# Supplementary material for: Genotypes of Eruca vesicaria subsp. sativa grown in contrasting field environments differ on transcriptomic and metabolomic levels, significantly impacting nutritional quality
Source: Front Plant Sci. 2023 Nov 2;14:1218984. doi: 10.3389/fpls.2023.1218984 (PMC10652768; doi:10.3389/fpls.2023.1218984)
Supplement: Supplementary File S6 — Pearson’s correlation analysis (n-1) results for six Eruca vesicaria subsp. sativa extreme line phytochemical compositions and selected gene expression data (related to sulfur metabolism, glucosinolate biosynthesis, glucosinolate hydrolysis, redox metabolism, VOC synthesis, stress response, and sugar metabolism). Values in bold are significant correlations p = <0.001. Red cells signify negative correlations, green cells signify positive correlations. [file Table_5.xlsx]

## Sheet: modules
genes	modules	KEGG AnnotInfo	KEGG url
evm.TU.scaffold1.163	M1	calmodulin-binding protein-like protein	http://www.genome.jp/dbget-bin/www_bget?ath:AT5G10660
evm.TU.scaffold10.193	M1	histone H4; K11254 histone H4	http://www.genome.jp/dbget-bin/www_bget?ath:AT3G53730
evm.TU.scaffold1008.16	M1	GSTF14; glutathione S-transferase (class phi) 14; K00799 glutathione S-transferase [EC:2.5.1.18]	http://www.genome.jp/dbget-bin/www_bget?ath:AT1G49860
evm.TU.scaffold1008.7	M1	nucleobase-ascorbate transporter 4	http://www.genome.jp/dbget-bin/www_bget?ath:AT1G49960
evm.TU.scaffold1010.23	M1	aspartyl protease-like protein	http://www.genome.jp/dbget-bin/www_bget?ath:AT1G03220
evm.TU.scaffold103.68	M1	BCB; blue-copper-binding protein	http://www.genome.jp/dbget-bin/www_bget?ath:AT5G20230
evm.TU.scaffold1037.13	M1	MIOX4; myo-inositol oxygenase 4; K00469 inositol oxygenase [EC:1.13.99.1]	http://www.genome.jp/dbget-bin/www_bget?ath:AT4G26260
evm.TU.scaffold1041.6	M1	MYB108; putative transcription factor MYB108; K09422 myb proto-oncogene protein, plant	http://www.genome.jp/dbget-bin/www_bget?ath:AT3G06490
evm.TU.scaffold1047.15	M1	PCAP1; plasma-membrane associated cation-binding protein 1	http://www.genome.jp/dbget-bin/www_bget?ath:AT4G20260
evm.TU.scaffold105.16	M1	QRT2; polygalacturonase QRT2	http://www.genome.jp/dbget-bin/www_bget?ath:AT3G07970
evm.TU.scaffold105.6	M1	phosphoglycerate mutase, 2,3-bisphosphoglycerate-independent; K15633 2,3-bisphosphoglycerate-independent phosphoglycerate mutase [EC:5.4.2.12]	http://www.genome.jp/dbget-bin/www_bget?ath:AT3G08590
evm.TU.scaffold105.7	M1	Clathrin, heavy chain; K04646 clathrin heavy chain	http://www.genome.jp/dbget-bin/www_bget?ath:AT3G08530
evm.TU.scaffold1053.15	M1	ethylene-responsive transcription factor ERF036	http://www.genome.jp/dbget-bin/www_bget?ath:AT3G16280
evm.TU.scaffold1055.1	M1	DCP2; mRNA-decapping enzyme subunit 2; K12613 mRNA-decapping enzyme subunit 2 [EC:3.6.1.62]	http://www.genome.jp/dbget-bin/www_bget?ath:AT5G13570
evm.TU.scaffold106.115	M1	hypothetical protein	http://www.genome.jp/dbget-bin/www_bget?ath:AT3G15250
evm.TU.scaffold106.32	M1	ESM1; epithiospecifier modifier 1	http://www.genome.jp/dbget-bin/www_bget?ath:AT3G14210
evm.TU.scaffold106.39	M1	PME3; pectin methylesterase 3; K01051 pectinesterase [EC:3.1.1.11]	http://www.genome.jp/dbget-bin/www_bget?ath:AT3G14310
evm.TU.scaffold106.99	M1	hypothetical protein	http://www.genome.jp/dbget-bin/www_bget?ath:AT3G15040
evm.TU.scaffold1060.1	M1	adenine nucleotide alpha hydrolases-like protein	http://www.genome.jp/dbget-bin/www_bget?ath:AT3G03270
evm.TU.scaffold1060.2	M1	HDG8; homeobox-leucine zipper protein HDG8; K09338 homeobox-leucine zipper protein	http://www.genome.jp/dbget-bin/www_bget?ath:AT3G03260
evm.TU.scaffold1067.1	M1	HB-7; homeobox-leucine zipper protein ATHB-7	http://www.genome.jp/dbget-bin/www_bget?ath:AT2G46680
evm.TU.scaffold1068.12	M1	OPR1; 12-oxophytodienoate reductase 1; K05894 12-oxophytodienoic acid reductase [EC:1.3.1.42]	http://www.genome.jp/dbget-bin/www_bget?ath:AT1G76680
evm.TU.scaffold1068.9	M1	hypothetical protein	http://www.genome.jp/dbget-bin/www_bget?ath:AT1G76600
evm.TU.scaffold107.8	M1	putative cysteine proteinase; K01376 [EC:3.4.22.-]	http://www.genome.jp/dbget-bin/www_bget?ath:AT3G49340
evm.TU.scaffold1071.7	M1	UGT73B1; UDP-glucosyl transferase 73B1	http://www.genome.jp/dbget-bin/www_bget?ath:AT4G34138
evm.TU.scaffold1071.8	M1	calcium-dependent lipid-binding domain-containing protein	http://www.genome.jp/dbget-bin/www_bget?ath:AT4G34150
evm.TU.scaffold1072.2	M1	PGIP2; polygalacturonase inhibitor 2	http://www.genome.jp/dbget-bin/www_bget?ath:AT5G06870
evm.TU.scaffold1081.28	M1	RHL41; high light responsive zinc finger protein ZAT12	http://www.genome.jp/dbget-bin/www_bget?ath:AT5G59820
evm.TU.scaffold1081.42	M1	histone H4; K11254 histone H4	http://www.genome.jp/dbget-bin/www_bget?ath:AT3G53730
evm.TU.scaffold1081.46	M1	Leucine-rich repeat protein kinase family protein	http://www.genome.jp/dbget-bin/www_bget?ath:AT5G59670
evm.TU.scaffold1081.65_evm.TU.scaffold1081.66	M1	LTP4; non-specific lipid-transfer protein 4	http://www.genome.jp/dbget-bin/www_bget?ath:AT5G59310
evm.TU.scaffold1089.8	M1	leucine-rich repeat protein kinase family protein	http://www.genome.jp/dbget-bin/www_bget?ath:AT5G59680
evm.TU.scaffold109.27	M1	MMP; matrix metalloproteinase	http://www.genome.jp/dbget-bin/www_bget?ath:AT1G70170
evm.TU.scaffold11.163	M1	Optic atrophy 3 protein (OPA3)	http://www.genome.jp/dbget-bin/www_bget?ath:AT1G28510
evm.TU.scaffold11.18	M1	ATSDI1; protein SULPHUR DEFICIENCY-INDUCED 1	http://www.genome.jp/dbget-bin/www_bget?ath:AT5G48850
evm.TU.scaffold11.248	M1	putative calcium-binding protein CML25; K13448 calcium-binding protein CML	http://www.genome.jp/dbget-bin/www_bget?ath:AT1G24620
evm.TU.scaffold11.31	M1	FPF1; flowering promoting factor 1	http://www.genome.jp/dbget-bin/www_bget?ath:AT5G24860
evm.TU.scaffold11.55	M1	bZIP1; basic leucine-zipper 1	http://www.genome.jp/dbget-bin/www_bget?ath:AT5G49450
evm.TU.scaffold1111.4	M1	nucleoporin autopeptidase; K14297 nuclear pore complex protein Nup98-Nup96	http://www.genome.jp/dbget-bin/www_bget?ath:AT1G10390
evm.TU.scaffold1133.17	M1	B-cell receptor-associated 31-like protein	http://www.genome.jp/dbget-bin/www_bget?ath:AT1G48440
evm.TU.scaffold1143.38	M1	PA-domain containing subtilase family protein	http://www.genome.jp/dbget-bin/www_bget?ath:AT4G30020
evm.TU.scaffold115.75	M1	CLE40; protein CLAVATA3/ESR-related 40	http://www.genome.jp/dbget-bin/www_bget?ath:AT5G12990
evm.TU.scaffold1156.16	M1	40S ribosomal protein S28-1; K02979 small subunit ribosomal protein S28e	http://www.genome.jp/dbget-bin/www_bget?ath:AT5G03850
evm.TU.scaffold1157.1	M1	calcium-dependent lipid-binding domain-containing protein	http://www.genome.jp/dbget-bin/www_bget?ath:AT4G15740
evm.TU.scaffold1159.18	M1	TT4; chalcone synthase; K00660 chalcone synthase [EC:2.3.1.74]	http://www.genome.jp/dbget-bin/www_bget?ath:AT5G13930
evm.TU.scaffold1161.2	M1	putative pectinesterase 29	http://www.genome.jp/dbget-bin/www_bget?ath:AT3G24130
evm.TU.scaffold1164.2	M1	DIN2; beta-glucosidase 30; K01188 beta-glucosidase [EC:3.2.1.21]	http://www.genome.jp/dbget-bin/www_bget?ath:AT3G60140
evm.TU.scaffold1171.23_evm.TU.scaffold1171.24	M1	hypothetical protein	http://www.genome.jp/dbget-bin/www_bget?ath:AT1G77220
evm.TU.scaffold1176.6	M1	SAUR-like auxin-responsive protein; K14488 SAUR family protein	http://www.genome.jp/dbget-bin/www_bget?ath:AT4G38860
evm.TU.scaffold1180.2	M1	hypothetical protein	http://www.genome.jp/dbget-bin/www_bget?ath:AT4G15610
evm.TU.scaffold119.47	M1	MYND-type zinc finger protein	http://www.genome.jp/dbget-bin/www_bget?ath:AT5G50450
evm.TU.scaffold1190.11	M1	tolB-related protein	http://www.genome.jp/dbget-bin/www_bget?ath:AT4G01870
evm.TU.scaffold1191.26	M1	peroxidase 1; K00430 peroxidase [EC:1.11.1.7]	http://www.genome.jp/dbget-bin/www_bget?ath:AT1G05240
evm.TU.scaffold1198.55	M1	WDL1; WVD2-like 1	http://www.genome.jp/dbget-bin/www_bget?ath:AT3G04630
evm.TU.scaffold12.128	M1	hypothetical protein	http://www.genome.jp/dbget-bin/www_bget?ath:AT1G54095
evm.TU.scaffold12.33	M1	hypothetical protein	http://www.genome.jp/dbget-bin/www_bget?ath:AT1G56060
evm.TU.scaffold120.53	M1	HAI1; putative protein phosphatase 2C 78; K14497 protein phosphatase 2C [EC:3.1.3.16]	http://www.genome.jp/dbget-bin/www_bget?ath:AT5G59220
evm.TU.scaffold1211.11	M1	GSH1; glutamate-cysteine ligase; K01919 glutamate--cysteine ligase [EC:6.3.2.2]	http://www.genome.jp/dbget-bin/www_bget?ath:AT4G23100
evm.TU.scaffold1217.5	M1	histone H1.2; K11275 histone H1/5	http://www.genome.jp/dbget-bin/www_bget?ath:AT2G30620
evm.TU.scaffold123.28	M1	NAC060; NAC domain containing protein 60	http://www.genome.jp/dbget-bin/www_bget?ath:AT3G44290
evm.TU.scaffold123.45	M1	putative cytochrome P450	http://www.genome.jp/dbget-bin/www_bget?ath:AT2G12190
evm.TU.scaffold123.87	M1	AAP6; amino acid permease 6	http://www.genome.jp/dbget-bin/www_bget?ath:AT5G49630
evm.TU.scaffold124.23	M1	zinc finger protein CONSTANS-LIKE 16	http://www.genome.jp/dbget-bin/www_bget?ath:AT1G25440
evm.TU.scaffold124.25	M1	KCS6; 3-ketoacyl-CoA synthase 6; K15397 3-ketoacyl-CoA synthase [EC:2.3.1.199]	http://www.genome.jp/dbget-bin/www_bget?ath:AT1G68530
evm.TU.scaffold1245.24	M1	UGT75B1; UDP-glucosyltransferase 75B1; K13692 UDP-glucose:(indol-3-yl)acetate beta-D-glucosyltransferase [EC:2.4.1.121]	http://www.genome.jp/dbget-bin/www_bget?ath:AT1G05560
evm.TU.scaffold1248.12	M1	MLP28; MLP-like protein 28	http://www.genome.jp/dbget-bin/www_bget?ath:AT1G70830
evm.TU.scaffold1252.30	M1	hypothetical protein	http://www.genome.jp/dbget-bin/www_bget?ath:AT1G06137
evm.TU.scaffold1252.4	M1	UGT74E2; Uridine diphosphate glycosyltransferase 74E2	http://www.genome.jp/dbget-bin/www_bget?ath:AT1G05680
evm.TU.scaffold126.3	M1	VQ motif-containing protein	http://www.genome.jp/dbget-bin/www_bget?ath:AT1G78410
evm.TU.scaffold1262.7	M1	putative invertase/pectin methylesterase inhibitor	http://www.genome.jp/dbget-bin/www_bget?ath:AT5G50040
evm.TU.scaffold1270.6	M1	PRA1.B4; prenylated RAB acceptor 1.B4	http://www.genome.jp/dbget-bin/www_bget?ath:AT2G38360
evm.TU.scaffold1278.32	M1	Regulator of chromosome condensation (RCC1) family protein	http://www.genome.jp/dbget-bin/www_bget?ath:AT3G53830
evm.TU.scaffold1278.41	M1	Bifunctional inhibitor/lipid-transfer protein/seed storage 2S albumin superfamily protein	http://www.genome.jp/dbget-bin/www_bget?ath:AT3G53980
evm.TU.scaffold1291.34	M1	rps12; ribosomal protein S12; K02950 small subunit ribosomal protein S12	http://www.genome.jp/dbget-bin/www_bget?ath:ArthMp085
evm.TU.scaffold1292.15	M1	KTI1; kunitz trypsin inhibitor 1	http://www.genome.jp/dbget-bin/www_bget?ath:AT1G73260
evm.TU.scaffold1297.2	M1	VQ motif-containing protein	http://www.genome.jp/dbget-bin/www_bget?ath:AT1G68450
evm.TU.scaffold1297.3	M1	hypothetical protein	http://www.genome.jp/dbget-bin/www_bget?ath:AT1G68440
evm.TU.scaffold13.53	M1	GDH2; glutamate dehydrogenase 2; K00261 glutamate dehydrogenase (NAD(P)+) [EC:1.4.1.3]	http://www.genome.jp/dbget-bin/www_bget?ath:AT5G07440
evm.TU.scaffold1301.10	M1	hypothetical protein	http://www.genome.jp/dbget-bin/www_bget?ath:AT1G06137
evm.TU.scaffold1308.6	M1	hypothetical protein	http://www.genome.jp/dbget-bin/www_bget?ath:AT1G23640
evm.TU.scaffold1309.5	M1	SULTR1;2; sulfate transporter 1;2; K17470 sulfate transporter 1, high-affinity	http://www.genome.jp/dbget-bin/www_bget?ath:AT1G78000
evm.TU.scaffold131.36	M1	CCS; copper chaperone for SOD1	http://www.genome.jp/dbget-bin/www_bget?ath:AT1G12520
evm.TU.scaffold1310.12	M1	heavy metal transport/detoxification domain-containing protein	http://www.genome.jp/dbget-bin/www_bget?ath:AT5G03380
evm.TU.scaffold1310.5	M1	hypothetical protein	http://www.genome.jp/dbget-bin/www_bget?ath:AT5G03210
evm.TU.scaffold1313.23	M1	PP2C5; protein phosphatase 2C 5	http://www.genome.jp/dbget-bin/www_bget?ath:AT2G40180
evm.TU.scaffold1319.3	M1	SPFH/Band 7/PHB domain-containing membrane-associated protein family	http://www.genome.jp/dbget-bin/www_bget?ath:AT5G64870
evm.TU.scaffold1319.5	M1	--	--
evm.TU.scaffold1320.3	M1	CRK36; cysteine-rich receptor-like protein kinase 36	http://www.genome.jp/dbget-bin/www_bget?ath:AT4G04490
evm.TU.scaffold1320.6	M1	aspartic proteinase A3; K08245 phytepsin [EC:3.4.23.40]	http://www.genome.jp/dbget-bin/www_bget?ath:AT4G04460
evm.TU.scaffold1326.2	M1	hypothetical protein	http://www.genome.jp/dbget-bin/www_bget?ath:AT3G02430
evm.TU.scaffold133.77	M1	ZF2; zinc-finger protein 2	http://www.genome.jp/dbget-bin/www_bget?ath:AT3G19580
evm.TU.scaffold1336.12	M1	glutaredoxin ATGRXS13	http://www.genome.jp/dbget-bin/www_bget?ath:AT1G03850
evm.TU.scaffold1336.7	M1	SOM; CCCH-type zinc finger protein SOMNUS	http://www.genome.jp/dbget-bin/www_bget?ath:AT1G03790
evm.TU.scaffold1337.5	M1	PCME; prenylcysteine methylesterase; K15889 prenylcysteine alpha-carboxyl methylesterase [EC:3.1.1.-]	http://www.genome.jp/dbget-bin/www_bget?ath:AT5G15860
evm.TU.scaffold134.23	M1	curculin-like (mannose-binding) lectin family protein	http://www.genome.jp/dbget-bin/www_bget?ath:AT5G18470
evm.TU.scaffold134.57	M1	CLT3; CRT (chloroquine-resistance transporter)-like transporter 3	http://www.genome.jp/dbget-bin/www_bget?ath:AT5G12170
evm.TU.scaffold1342.9	M1	PPa4; pyrophosphorylase 4; K01507 inorganic pyrophosphatase [EC:3.6.1.1]	http://www.genome.jp/dbget-bin/www_bget?ath:AT3G53620
evm.TU.scaffold1344.10	M1	VSP1; acid phosphatase VSP1	http://www.genome.jp/dbget-bin/www_bget?ath:AT5G24780
evm.TU.scaffold1348.23	M1	major facilitator protein	http://www.genome.jp/dbget-bin/www_bget?ath:AT5G14120
evm.TU.scaffold135.18	M1	lysophosphatidic acid acyltransferase	http://www.genome.jp/dbget-bin/www_bget?ath:AT4G24160
evm.TU.scaffold135.35	M1	TRE1; trehalase 1; K01194 alpha,alpha-trehalase [EC:3.2.1.28]	http://www.genome.jp/dbget-bin/www_bget?ath:AT4G24040
evm.TU.scaffold135.68	M1	galactose mutarotase-like superfamily protein; K01792 glucose-6-phosphate 1-epimerase [EC:5.1.3.15]	http://www.genome.jp/dbget-bin/www_bget?ath:AT4G23730
evm.TU.scaffold1352.17	M1	P5CS1; delta1-pyrroline-5-carboxylate synthase 1; K12657 delta-1-pyrroline-5-carboxylate synthetase [EC:2.7.2.11 1.2.1.41]	http://www.genome.jp/dbget-bin/www_bget?ath:AT2G39800
evm.TU.scaffold1356.5	M1	serine protease inhibitor, Kazal-type family protein	http://www.genome.jp/dbget-bin/www_bget?ath:AT3G61980
evm.TU.scaffold1356.9	M1	HB-12; homeobox-leucine zipper protein ATHB-12; K09338 homeobox-leucine zipper protein	http://www.genome.jp/dbget-bin/www_bget?ath:AT3G61890
evm.TU.scaffold137.45	M1	trehalose-phosphate phosphatase G; K01087 trehalose 6-phosphate phosphatase [EC:3.1.3.12]	http://www.genome.jp/dbget-bin/www_bget?ath:AT4G22590
evm.TU.scaffold137.86	M1	CYP81D4; cytochrome P450, family 81, subfamily D, polypeptide 4; K00517 [EC:1.14.-.-]	http://www.genome.jp/dbget-bin/www_bget?ath:AT4G37330
evm.TU.scaffold1373.9	M1	hypothetical protein	http://www.genome.jp/dbget-bin/www_bget?ath:AT2G38790
evm.TU.scaffold1374.11	M1	Rossmann-fold NAD(P)-binding domain-containing protein	http://www.genome.jp/dbget-bin/www_bget?ath:AT5G14700
evm.TU.scaffold139.172	M1	PLA-I{beta]2; phospholipase A1-Ibeta2	http://www.genome.jp/dbget-bin/www_bget?ath:AT4G16820
evm.TU.scaffold139.205	M1	GLN1;4; glutamine synthetase 1;4; K01915 glutamine synthetase [EC:6.3.1.2]	http://www.genome.jp/dbget-bin/www_bget?ath:AT5G16570
evm.TU.scaffold139.41	M1	UGT71B5; UDP-glucosyl transferase 71B5	http://www.genome.jp/dbget-bin/www_bget?ath:AT4G15280
evm.TU.scaffold139.49	M1	RTL1; protein RNAse II-like 1	http://www.genome.jp/dbget-bin/www_bget?ath:AT4G15417
evm.TU.scaffold139.67	M1	hypothetical protein	http://www.genome.jp/dbget-bin/www_bget?ath:AT4G15563
evm.TU.scaffold139.91	M1	NUDT7; nudix hydrolase 7	http://www.genome.jp/dbget-bin/www_bget?ath:AT4G12720
evm.TU.scaffold139.95	M1	hypothetical protein	http://www.genome.jp/dbget-bin/www_bget?ath:AT4G15990
evm.TU.scaffold1395.1	M1	DMR6; putative 2OG-Fe(II) oxygenase	http://www.genome.jp/dbget-bin/www_bget?ath:AT5G24530
evm.TU.scaffold1395.15	M1	LSU2; protein RESPONSE TO LOW SULFUR 2	http://www.genome.jp/dbget-bin/www_bget?ath:AT5G24660
evm.TU.scaffold1398.6	M1	PLA2A; phospholipase A 2A	http://www.genome.jp/dbget-bin/www_bget?ath:AT2G26560
evm.TU.scaffold14.129	M1	WES1; indole-3-acetic acid-amido synthetase GH3.5; K14487 auxin responsive GH3 gene family	http://www.genome.jp/dbget-bin/www_bget?ath:AT4G27260
evm.TU.scaffold14.226	M1	hypothetical protein	http://www.genome.jp/dbget-bin/www_bget?ath:AT4G32480
evm.TU.scaffold14.236	M1	hypothetical protein	http://www.genome.jp/dbget-bin/www_bget?ath:AT4G28460
evm.TU.scaffold14.7	M1	aldose 1-epimerase family protein; K01792 glucose-6-phosphate 1-epimerase [EC:5.1.3.15]	http://www.genome.jp/dbget-bin/www_bget?ath:AT4G25900
evm.TU.scaffold1403.6	M1	Granulin repeat cysteine protease family protein	http://www.genome.jp/dbget-bin/www_bget?ath:AT3G19390
evm.TU.scaffold1418.10	M1	ABR1; ethylene-responsive transcription factor ABR1	http://www.genome.jp/dbget-bin/www_bget?ath:AT5G64750
evm.TU.scaffold1418.11	M1	RGF9; root meristem growth factor 9	http://www.genome.jp/dbget-bin/www_bget?ath:AT5G64770
evm.TU.scaffold1418.13	M1	WRKY51; putative WRKY transcription factor 51	http://www.genome.jp/dbget-bin/www_bget?ath:AT5G64810
evm.TU.scaffold143.8	M1	FIS1B; hypothetical protein; K17969 mitochondrial fission 1 protein	http://www.genome.jp/dbget-bin/www_bget?ath:AT5G12390
evm.TU.scaffold1430.4	M1	hypothetical protein	http://www.genome.jp/dbget-bin/www_bget?ath:AT5G04080
evm.TU.scaffold1443.8	M1	Integrin-linked protein kinase family protein	http://www.genome.jp/dbget-bin/www_bget?ath:AT4G18950
evm.TU.scaffold1460.13	M1	Rap2.6L; ethylene-responsive transcription factor ERF113	http://www.genome.jp/dbget-bin/www_bget?ath:AT5G13330
evm.TU.scaffold1462.1	M1	F-box protein	http://www.genome.jp/dbget-bin/www_bget?ath:AT3G16210
evm.TU.scaffold1462.12	M1	probable isoaspartyl peptidase/L-asparaginase 2; K13051 beta-aspartyl-peptidase (threonine type) [EC:3.4.19.5]	http://www.genome.jp/dbget-bin/www_bget?ath:AT3G16150
evm.TU.scaffold147.44	M1	probable pectinesterase/pectinesterase inhibitor 20; K01051 pectinesterase [EC:3.1.1.11]	http://www.genome.jp/dbget-bin/www_bget?ath:AT2G47550
evm.TU.scaffold147.64	M1	transcription factor UPBEAT1	http://www.genome.jp/dbget-bin/www_bget?ath:AT2G47270
evm.TU.scaffold1478.1	M1	putative protein phosphatase 2C 61	http://www.genome.jp/dbget-bin/www_bget?ath:AT4G32950
evm.TU.scaffold1494.5	M1	hypothetical protein	http://www.genome.jp/dbget-bin/www_bget?ath:AT5G02580
evm.TU.scaffold15.86	M1	PRF4; profilin 4; K05759 profilin	http://www.genome.jp/dbget-bin/www_bget?ath:AT4G29340
evm.TU.scaffold1512.11	M1	plant invertase/pectin methylesterase inhibitor domain-containing protein	http://www.genome.jp/dbget-bin/www_bget?ath:AT1G62770
evm.TU.scaffold1512.9	M1	Cupredoxin superfamily protein	http://www.genome.jp/dbget-bin/www_bget?ath:AT2G15780
evm.TU.scaffold152.50	M1	WRKY22; WRKY transcription factor 22; K13425 WRKY transcription factor 22	http://www.genome.jp/dbget-bin/www_bget?ath:AT4G01250
evm.TU.scaffold1529.1	M1	AAE7; Acetate/butyrate--CoA ligase AAE7	http://www.genome.jp/dbget-bin/www_bget?ath:AT3G16910
evm.TU.scaffold1529.8	M1	putative protein phosphatase 2C	http://www.genome.jp/dbget-bin/www_bget?ath:AT3G16800
evm.TU.scaffold1538.13	M1	histone H3; K11253 histone H3	http://www.genome.jp/dbget-bin/www_bget?ath:AT3G27360
evm.TU.scaffold154.48	M1	GRAM domain family protein	http://www.genome.jp/dbget-bin/www_bget?ath:AT5G13200
evm.TU.scaffold1542.5	M1	CYP76C3; cytochrome P450 76C3	http://www.genome.jp/dbget-bin/www_bget?ath:AT2G45580
evm.TU.scaffold1546.8	M1	Got1/Sft2-like vescicle transport protein	http://www.genome.jp/dbget-bin/www_bget?ath:AT3G03180
evm.TU.scaffold1557.9	M1	PSK6; phytosulfokine 6 precursor	http://www.genome.jp/dbget-bin/www_bget?ath:AT4G37720
evm.TU.scaffold1558.1	M1	P-loop containing nucleoside triphosphate hydrolases superfamily protein	http://www.genome.jp/dbget-bin/www_bget?ath:AT2G46620
evm.TU.scaffold1576.4	M1	ALDH2C4; aldehyde dehydrogenase 2C4; K12355 coniferyl-aldehyde dehydrogenase [EC:1.2.1.68]	http://www.genome.jp/dbget-bin/www_bget?ath:AT3G24503
evm.TU.scaffold1579.1	M1	hypothetical protein	http://www.genome.jp/dbget-bin/www_bget?ath:AT5G65300
evm.TU.scaffold158.9	M1	Leucine-rich repeat transmembrane protein kinase	http://www.genome.jp/dbget-bin/www_bget?ath:AT1G29720
evm.TU.scaffold159.125	M1	hypothetical protein	http://www.genome.jp/dbget-bin/www_bget?ath:AT1G69890
evm.TU.scaffold1592.7	M1	AIG2-like protein	http://www.genome.jp/dbget-bin/www_bget?ath:AT3G28940
evm.TU.scaffold1595.3	M1	alpha/beta-Hydrolases superfamily protein	http://www.genome.jp/dbget-bin/www_bget?ath:AT3G15650
evm.TU.scaffold16.101	M1	pectin lyase-like superfamily protein; K01184 polygalacturonase [EC:3.2.1.15]	http://www.genome.jp/dbget-bin/www_bget?ath:AT5G14650
evm.TU.scaffold16.108	M1	GHMP kinase family protein; K16190 glucuronokinase [EC:2.7.1.43]	http://www.genome.jp/dbget-bin/www_bget?ath:AT5G14470
evm.TU.scaffold16.111	M1	RGLG2; E3 ubiquitin-protein ligase RGLG2; K16280 E3 ubiquitin-protein ligase RGLG [EC:6.3.2.19]	http://www.genome.jp/dbget-bin/www_bget?ath:AT5G14420
evm.TU.scaffold16.165	M1	ZIFL1; zinc induced facilitator-like 1 protein	http://www.genome.jp/dbget-bin/www_bget?ath:AT5G13750
evm.TU.scaffold16.195	M1	Rap2.6L; ethylene-responsive transcription factor ERF113	http://www.genome.jp/dbget-bin/www_bget?ath:AT5G13330
evm.TU.scaffold16.211	M1	SAG29; senescence-associated protein 29; K15382 solute carrier family 50 (sugar transporter)	http://www.genome.jp/dbget-bin/www_bget?ath:AT5G13170
evm.TU.scaffold160.25	M1	CYP71B2; cytochrome P450 71B2	http://www.genome.jp/dbget-bin/www_bget?ath:AT1G13080
evm.TU.scaffold1609.20	M1	Bifunctional inhibitor/lipid-transfer protein/seed storage 2S albumin superfamily protein	http://www.genome.jp/dbget-bin/www_bget?ath:AT3G53980
evm.TU.scaffold161.1	M1	hypothetical protein	http://www.genome.jp/dbget-bin/www_bget?ath:AT3G20300
evm.TU.scaffold161.38	M1	hypothetical protein	http://www.genome.jp/dbget-bin/www_bget?ath:AT3G19920
evm.TU.scaffold161.67	M1	hypothetical protein	http://www.genome.jp/dbget-bin/www_bget?ath:AT3G19615
evm.TU.scaffold162.55	M1	hypothetical protein	http://www.genome.jp/dbget-bin/www_bget?ath:AT4G34320
evm.TU.scaffold1623.12	M1	ARA12; subtilisin-like protease	http://www.genome.jp/dbget-bin/www_bget?ath:AT5G67360
evm.TU.scaffold1623.17	M1	LBD37; LOB domain-containing protein 37	http://www.genome.jp/dbget-bin/www_bget?ath:AT5G67420
evm.TU.scaffold1627.4	M1	SCRL8; protein SCR-like 8	http://www.genome.jp/dbget-bin/www_bget?ath:AT1G60983
evm.TU.scaffold1629.4	M1	GAE6; UDP-D-glucuronate 4-epimerase 6; K08679 UDP-glucuronate 4-epimerase [EC:5.1.3.6]	http://www.genome.jp/dbget-bin/www_bget?ath:AT3G23820
evm.TU.scaffold1632.16	M1	trihelix transcription factor GT-3a	http://www.genome.jp/dbget-bin/www_bget?ath:AT5G01380
evm.TU.scaffold1633.4	M1	putative leucine-rich repeat receptor-like serine/threonine-protein kinase	http://www.genome.jp/dbget-bin/www_bget?ath:AT2G24130
evm.TU.scaffold1638.3	M1	sugar transport protein 8	http://www.genome.jp/dbget-bin/www_bget?ath:AT5G26250
evm.TU.scaffold164.33	M1	NIP6;1; aquaporin NIP6-1; K09874 aquaporin NIP	http://www.genome.jp/dbget-bin/www_bget?ath:AT1G80760
evm.TU.scaffold164.8	M1	AVP1; Pyrophosphate-energized vacuolar membrane proton pump 1; K01507 inorganic pyrophosphatase [EC:3.6.1.1]	http://www.genome.jp/dbget-bin/www_bget?ath:AT1G15690
evm.TU.scaffold164.9	M1	plant thionin family protein	http://www.genome.jp/dbget-bin/www_bget?ath:AT2G26865
evm.TU.scaffold1642.6	M1	hypothetical protein	http://www.genome.jp/dbget-bin/www_bget?ath:AT5G39520
evm.TU.scaffold1642.7	M1	hypothetical protein	http://www.genome.jp/dbget-bin/www_bget?ath:AT5G39520
evm.TU.scaffold1659.14	M1	CCR2; cinnamoyl-CoA reductase; K09753 cinnamoyl-CoA reductase [EC:1.2.1.44]	http://www.genome.jp/dbget-bin/www_bget?ath:AT1G80820
evm.TU.scaffold1661.18	M1	GTE8; global transcription factor group E8	http://www.genome.jp/dbget-bin/www_bget?ath:AT3G27260
evm.TU.scaffold1664.3	M1	probable aldo-keto reductase 6	http://www.genome.jp/dbget-bin/www_bget?ath:AT1G60750
evm.TU.scaffold168.8	M1	ethylene-responsive transcription factor ERF112	http://www.genome.jp/dbget-bin/www_bget?ath:AT2G33710
evm.TU.scaffold1705.9	M1	hypothetical protein	http://www.genome.jp/dbget-bin/www_bget?ath:AT5G66650
evm.TU.scaffold1718.2	M1	hypothetical protein	http://www.genome.jp/dbget-bin/www_bget?ath:AT5G41100
evm.TU.scaffold1731.9	M1	BGL2; beta 1,3-glucanase 2	http://www.genome.jp/dbget-bin/www_bget?ath:AT3G57260
evm.TU.scaffold1747.3	M1	lipase class 3-related protein	http://www.genome.jp/dbget-bin/www_bget?ath:AT5G24220
evm.TU.scaffold1750.1	M1	hypothetical protein	http://www.genome.jp/dbget-bin/www_bget?ath:AT1G76070
evm.TU.scaffold1753.1	M1	CA1; carbonic anhydrase 1; K01673 carbonic anhydrase [EC:4.2.1.1]	http://www.genome.jp/dbget-bin/www_bget?ath:AT3G01500
evm.TU.scaffold1753.9	M1	DOX1; alpha-dioxygenase; K10529 alpha-dioxygenase [EC:1.-.-.-]	http://www.genome.jp/dbget-bin/www_bget?ath:AT3G01420
evm.TU.scaffold1755.15	M1	CAX4; vacuolar cation/proton exchanger 4; K07300 Ca2+:H+ antiporter	http://www.genome.jp/dbget-bin/www_bget?ath:AT5G01490
evm.TU.scaffold176.116	M1	kunitz family trypsin and protease inhibitor protein	http://www.genome.jp/dbget-bin/www_bget?ath:AT1G72290
evm.TU.scaffold176.26	M1	SS2; strictosidine synthase 2; K01757 strictosidine synthase [EC:4.3.3.2]	http://www.genome.jp/dbget-bin/www_bget?ath:AT1G74020
evm.TU.scaffold176.4	M1	pentatricopeptide repeat-containing protein	http://www.genome.jp/dbget-bin/www_bget?ath:AT1G74580
evm.TU.scaffold1761.6	M1	dehydration-responsive element-binding protein 2E	http://www.genome.jp/dbget-bin/www_bget?ath:AT2G38340
evm.TU.scaffold1764.12	M1	BIR1; BAK1-interacting receptor-like kinase BIR1	http://www.genome.jp/dbget-bin/www_bget?ath:AT5G48380
evm.TU.scaffold177.1	M1	NAC069; NAC transcription factor	http://www.genome.jp/dbget-bin/www_bget?ath:AT4G01550
evm.TU.scaffold1772.5	M1	membrane-associated kinase regulator family protein	http://www.genome.jp/dbget-bin/www_bget?ath:AT5G52900
evm.TU.scaffold1778.10	M1	CDPK-related kinase 4 (AtCRK4)	http://www.genome.jp/dbget-bin/www_bget?ath:AT5G24430
evm.TU.scaffold178.50	M1	RLP21; receptor like protein 21	http://www.genome.jp/dbget-bin/www_bget?ath:AT2G25470
evm.TU.scaffold18.41	M1	ankyrin-repeat containing protein	http://www.genome.jp/dbget-bin/www_bget?ath:AT1G03660
evm.TU.scaffold18.67	M1	NLA; E3 ubiquitin-protein ligase BAH1; K16275 E3 ubiquitin-protein ligase BAH [EC:6.3.2.19]	http://www.genome.jp/dbget-bin/www_bget?ath:AT1G02860
evm.TU.scaffold18.84	M1	ARFD1A; ADP-ribosylation factor D1A	http://www.genome.jp/dbget-bin/www_bget?ath:AT1G02440
evm.TU.scaffold18.96	M1	nodulin MtN21-like transporter family protein	http://www.genome.jp/dbget-bin/www_bget?ath:AT1G01070
evm.TU.scaffold1802.7	M1	StaR-like protein domain-containing protein	http://www.genome.jp/dbget-bin/www_bget?ath:AT1G27150
evm.TU.scaffold1805.9	M1	PP2-B11; phloem protein 2-B11	http://www.genome.jp/dbget-bin/www_bget?ath:AT1G80110
evm.TU.scaffold181.1	M1	PSK2; phytosulfokine-beta	http://www.genome.jp/dbget-bin/www_bget?ath:AT2G22860
evm.TU.scaffold181.33	M1	WRKY15; WRKY DNA-binding protein 15	http://www.genome.jp/dbget-bin/www_bget?ath:AT2G23320
evm.TU.scaffold1811.24	M1	DTX35; detoxifying efflux carrier 35; K03327 multidrug resistance protein, MATE family	http://www.genome.jp/dbget-bin/www_bget?ath:AT4G25640
evm.TU.scaffold1811.8	M1	XTH13; xyloglucan endotransglucosylase/hydrolase 13; K08235 xyloglucan:xyloglucosyl transferase [EC:2.4.1.207]	http://www.genome.jp/dbget-bin/www_bget?ath:AT5G57540
evm.TU.scaffold1811.9	M1	XTR6; probable xyloglucan endotransglucosylase/hydrolase protein 23; K08235 xyloglucan:xyloglucosyl transferase [EC:2.4.1.207]	http://www.genome.jp/dbget-bin/www_bget?ath:AT4G25810
evm.TU.scaffold1831.1	M1	LSU3; protein RESPONSE TO LOW SULFUR 3	http://www.genome.jp/dbget-bin/www_bget?ath:AT3G49570
evm.TU.scaffold186.2	M1	putative copper transport protein	http://www.genome.jp/dbget-bin/www_bget?ath:AT4G05030
evm.TU.scaffold1866.7	M1	pollen Ole e 1 allergen and extensin family protein	http://www.genome.jp/dbget-bin/www_bget?ath:AT3G16660
evm.TU.scaffold187.22	M1	protease inhibitor/seed storage/lipid transfer protein (LTP) family protein	http://www.genome.jp/dbget-bin/www_bget?ath:AT3G22600
evm.TU.scaffold188.73	M1	hypothetical protein	http://www.genome.jp/dbget-bin/www_bget?ath:AT5G57510
evm.TU.scaffold189.55	M1	PRP4; proline-rich protein 4	http://www.genome.jp/dbget-bin/www_bget?ath:AT4G38770
evm.TU.scaffold19.159	M1	hypothetical protein	http://www.genome.jp/dbget-bin/www_bget?ath:AT1G32928
evm.TU.scaffold19.54	M1	DREB2B; dehydration-responsive element-binding protein 2B; K09286 EREBP-like factor	http://www.genome.jp/dbget-bin/www_bget?ath:AT3G11020
evm.TU.scaffold190.16	M1	hypothetical protein	http://www.genome.jp/dbget-bin/www_bget?ath:AT1G07040
evm.TU.scaffold190.72	M1	phospholipase A1-IIalpha	http://www.genome.jp/dbget-bin/www_bget?ath:AT1G06250
evm.TU.scaffold1903.8	M1	--	--
evm.TU.scaffold1908.4	M1	zinc finger protein ZAT11	http://www.genome.jp/dbget-bin/www_bget?ath:AT2G37430
evm.TU.scaffold1908.5	M1	zinc finger protein ZAT11	http://www.genome.jp/dbget-bin/www_bget?ath:AT2G37430
evm.TU.scaffold1917.4	M1	hydroxyproline-rich glycoprotein family protein	http://www.genome.jp/dbget-bin/www_bget?ath:AT5G51680
evm.TU.scaffold192.33	M1	NAC062; transcription factor NTL6	http://www.genome.jp/dbget-bin/www_bget?ath:AT3G49530
evm.TU.scaffold193.38	M1	WRKY6; WRKY transcription factor 6	http://www.genome.jp/dbget-bin/www_bget?ath:AT1G62300
evm.TU.scaffold1930.3	M1	PPa2; soluble inorganic pyrophosphatase 2; K01507 inorganic pyrophosphatase [EC:3.6.1.1]	http://www.genome.jp/dbget-bin/www_bget?ath:AT2G18230
evm.TU.scaffold193477.1	M1	--	--
evm.TU.scaffold1938.2	M1	phosphoinositide phospholipase C 7; K05857 phosphatidylinositol phospholipase C, delta [EC:3.1.4.11]	http://www.genome.jp/dbget-bin/www_bget?ath:AT3G55940
evm.TU.scaffold194.4	M1	CCT motif family protein	http://www.genome.jp/dbget-bin/www_bget?ath:AT5G53420
evm.TU.scaffold195.61	M1	hypothetical protein	http://www.genome.jp/dbget-bin/www_bget?ath:AT2G27180
evm.TU.scaffold1950.17	M1	WD40 domain-containing protein	http://www.genome.jp/dbget-bin/www_bget?ath:AT3G18950
evm.TU.scaffold196.12	M1	PGL4; 6-phosphogluconolactonase 4; K01057 6-phosphogluconolactonase [EC:3.1.1.31]	http://www.genome.jp/dbget-bin/www_bget?ath:AT5G24410
evm.TU.scaffold196.53	M1	SLAH3; SLAC1 homologue 3	http://www.genome.jp/dbget-bin/www_bget?ath:AT5G24030
evm.TU.scaffold1961.4	M1	ring domain ligase 3	http://www.genome.jp/dbget-bin/www_bget?ath:AT5G63970
evm.TU.scaffold1971.3	M1	protein REI1-LIKE 1; K14816 pre-60S factor REI1	http://www.genome.jp/dbget-bin/www_bget?ath:AT4G31420
evm.TU.scaffold199.4	M1	QRT2; polygalacturonase QRT2	http://www.genome.jp/dbget-bin/www_bget?ath:AT3G07970
evm.TU.scaffold199.65	M1	BCE2; dihydrolipoamide branched chain acyltransferase; K09699 2-oxoisovalerate dehydrogenase E2 component (dihydrolipoyl transacylase) [EC:2.3.1.168]	http://www.genome.jp/dbget-bin/www_bget?ath:AT3G06850
evm.TU.scaffold199.76	M1	protein COILIN; K13150 coilin	http://www.genome.jp/dbget-bin/www_bget?ath:AT1G13030
evm.TU.scaffold199.77	M1	EMB2770; pre-mRNA-processing factor 6-like protein STA1; K12855 pre-mRNA-processing factor 6	http://www.genome.jp/dbget-bin/www_bget?ath:AT4G03430
evm.TU.scaffold1991.2	M1	ABR1; ethylene-responsive transcription factor ABR1	http://www.genome.jp/dbget-bin/www_bget?ath:AT5G64750
evm.TU.scaffold1992.16	M1	alpha/beta-Hydrolases superfamily protein	http://www.genome.jp/dbget-bin/www_bget?ath:AT3G15650
evm.TU.scaffold2.101	M1	Myosin heavy chain-related protein	http://www.genome.jp/dbget-bin/www_bget?ath:AT4G40020
evm.TU.scaffold2.12	M1	EXLA2; expansin-like A2	http://www.genome.jp/dbget-bin/www_bget?ath:AT4G38400
evm.TU.scaffold2.14	M1	ACT-like protein tyrosine kinase family protein	http://www.genome.jp/dbget-bin/www_bget?ath:AT4G38470
evm.TU.scaffold2.146	M1	BT5; BTB and TAZ domain protein 5	http://www.genome.jp/dbget-bin/www_bget?ath:AT4G37610
evm.TU.scaffold2.15	M1	hypothetical protein; K11667 INO80 complex subunit C	http://www.genome.jp/dbget-bin/www_bget?ath:AT4G38495
evm.TU.scaffold2.19	M1	SAUR-like auxin-responsive protein; K14488 SAUR family protein	http://www.genome.jp/dbget-bin/www_bget?ath:AT4G38840
evm.TU.scaffold2.211	M1	PQ-loop repeat family protein / transmembrane family protein	http://www.genome.jp/dbget-bin/www_bget?ath:AT4G36850
evm.TU.scaffold2.212	M1	hypothetical protein	http://www.genome.jp/dbget-bin/www_bget?ath:AT4G36820
evm.TU.scaffold2.45	M1	hypothetical protein	http://www.genome.jp/dbget-bin/www_bget?ath:AT4G39360
evm.TU.scaffold2.64	M1	GGT1; gamma-glutamyl transpeptidase 1; K18592 gamma-glutamyltranspeptidase / glutathione hydrolase / leukotriene-C4 hydrolase [EC:2.3.2.2 3.4.19.13 3.4.19.14]	http://www.genome.jp/dbget-bin/www_bget?ath:AT4G39640
evm.TU.scaffold20.1	M1	PRXR1; peroxidase 42; K00430 peroxidase [EC:1.11.1.7]	http://www.genome.jp/dbget-bin/www_bget?ath:AT4G21960
evm.TU.scaffold20.117	M1	putative CTP synthase; K01937 CTP synthase [EC:6.3.4.2]	http://www.genome.jp/dbget-bin/www_bget?ath:AT4G20320
evm.TU.scaffold20.220_evm.TU.scaffold20.221	M1	Integrin-linked protein kinase family protein	http://www.genome.jp/dbget-bin/www_bget?ath:AT4G18950
evm.TU.scaffold20.269	M1	hypothetical protein	http://www.genome.jp/dbget-bin/www_bget?ath:AT4G18425
evm.TU.scaffold20.3	M1	hypothetical protein	http://www.genome.jp/dbget-bin/www_bget?ath:AT4G21930
evm.TU.scaffold20.96	M1	FAD-binding Berberine family protein	http://www.genome.jp/dbget-bin/www_bget?ath:AT4G20860
evm.TU.scaffold200.70	M1	putative pectate lyase 22; K01728 pectate lyase [EC:4.2.2.2]	http://www.genome.jp/dbget-bin/www_bget?ath:AT5G63180
evm.TU.scaffold200.72	M1	BT1; BTB and TAZ domain protein 1	http://www.genome.jp/dbget-bin/www_bget?ath:AT5G63160
evm.TU.scaffold200.73	M1	PAP29; purple acid phosphatase 29	http://www.genome.jp/dbget-bin/www_bget?ath:AT5G63140
evm.TU.scaffold201.13	M1	alpha/beta-Hydrolases superfamily protein	http://www.genome.jp/dbget-bin/www_bget?ath:AT1G52700
evm.TU.scaffold2030.3	M1	PAP8; purple acid phosphatase 8	http://www.genome.jp/dbget-bin/www_bget?ath:AT2G01890
evm.TU.scaffold2039.2	M1	Galactose-binding protein	http://www.genome.jp/dbget-bin/www_bget?ath:AT1G71360
evm.TU.scaffold2045.1	M1	gibberellin-regulated protein 6	http://www.genome.jp/dbget-bin/www_bget?ath:AT1G74670
evm.TU.scaffold2045.22	M1	putative Isoflavone reductase	http://www.genome.jp/dbget-bin/www_bget?ath:AT1G75280
evm.TU.scaffold206.12	M1	AFP1; ABI five binding protein	http://www.genome.jp/dbget-bin/www_bget?ath:AT1G69260
evm.TU.scaffold206.22	M1	hypothetical protein	http://www.genome.jp/dbget-bin/www_bget?ath:AT1G69050
evm.TU.scaffold207.5	M1	BGAL5; beta-galactosidase 5	http://www.genome.jp/dbget-bin/www_bget?ath:AT1G45130
evm.TU.scaffold2091.14	M1	PMZ; zinc finger (AN1-like) family protein	http://www.genome.jp/dbget-bin/www_bget?ath:AT3G28210
evm.TU.scaffold21.9	M1	tetratricopeptide repeat (TPR)-like superfamily protein	http://www.genome.jp/dbget-bin/www_bget?ath:AT1G27110
evm.TU.scaffold2125.10	M1	bifunctional inhibitor/lipid-transfer protein/seed storage 2S albumin superfamily protein	http://www.genome.jp/dbget-bin/www_bget?ath:AT4G33550
evm.TU.scaffold213.12	M1	glycosyl hydrolase family protein; K05349 beta-glucosidase [EC:3.2.1.21]	http://www.genome.jp/dbget-bin/www_bget?ath:AT3G47000
evm.TU.scaffold213.36	M1	AGP2; arabinogalactan protein 2	http://www.genome.jp/dbget-bin/www_bget?ath:AT2G22470
evm.TU.scaffold213.63	M1	RPM1-interacting protein 4 (RIN4)	http://www.genome.jp/dbget-bin/www_bget?ath:AT3G48450
evm.TU.scaffold2135.4	M1	hypothetical protein	http://www.genome.jp/dbget-bin/www_bget?ath:AT2G47950
evm.TU.scaffold2158.11	M1	ZF1; zinc-finger protein 1	http://www.genome.jp/dbget-bin/www_bget?ath:AT5G67450
evm.TU.scaffold2162.6	M1	TGG2; myrosinase 2; K01237 myrosinase [EC:3.2.1.147]	http://www.genome.jp/dbget-bin/www_bget?ath:AT5G25980
evm.TU.scaffold217.101	M1	hypothetical protein	http://www.genome.jp/dbget-bin/www_bget?ath:AT1G23110
evm.TU.scaffold217.66	M1	UGT85A1; UDP-glycosyltransferase 85A1	http://www.genome.jp/dbget-bin/www_bget?ath:AT1G22400
evm.TU.scaffold217.93	M1	heavy-metal-associated domain-containing protein	http://www.genome.jp/dbget-bin/www_bget?ath:AT1G22990
evm.TU.scaffold2177.11	M1	MAN1; mannan endo-1,4-beta-mannosidase 1	http://www.genome.jp/dbget-bin/www_bget?ath:AT1G02310
evm.TU.scaffold2182.1	M1	FAD-binding Berberine family protein	http://www.genome.jp/dbget-bin/www_bget?ath:AT1G30700
evm.TU.scaffold2183.5	M1	hypothetical protein	http://www.genome.jp/dbget-bin/www_bget?ath:AT5G48335
evm.TU.scaffold2223.4	M1	BG3; beta-1,3-glucanase 3	http://www.genome.jp/dbget-bin/www_bget?ath:AT3G57240
evm.TU.scaffold223.19	M1	PIP2A; aquaporin PIP2-1; K09872 aquaporin PIP	http://www.genome.jp/dbget-bin/www_bget?ath:AT3G53420
evm.TU.scaffold2234.2	M1	hypothetical protein	http://www.genome.jp/dbget-bin/www_bget?ath:AT5G45690
evm.TU.scaffold2237.5	M1	SEC1B; protein transport sec1b; K15292 syntaxin-binding protein 1	http://www.genome.jp/dbget-bin/www_bget?ath:AT4G12120
evm.TU.scaffold2247.9	M1	PNC2; peroxisomal adenine nucleotide carrier 2	http://www.genome.jp/dbget-bin/www_bget?ath:AT5G27520
evm.TU.scaffold225.26	M1	MYB108; putative transcription factor MYB108; K09422 myb proto-oncogene protein, plant	http://www.genome.jp/dbget-bin/www_bget?ath:AT3G06490
evm.TU.scaffold225.74	M1	NF-YA2; nuclear transcription factor Y subunit A-2; K08064 nuclear transcription factor Y, alpha	http://www.genome.jp/dbget-bin/www_bget?ath:AT3G05690
evm.TU.scaffold2253.3	M1	heat shock protein Hsp18.5	http://www.genome.jp/dbget-bin/www_bget?ath:AT2G19310
evm.TU.scaffold2270.4	M1	CYCP2;1; cyclin p2;1	http://www.genome.jp/dbget-bin/www_bget?ath:AT3G21870
evm.TU.scaffold2286.10	M1	peroxidase 72; K00430 peroxidase [EC:1.11.1.7]	http://www.genome.jp/dbget-bin/www_bget?ath:AT5G66390
evm.TU.scaffold229.15	M1	calmodulin-binding protein-like protein	http://www.genome.jp/dbget-bin/www_bget?ath:AT5G10660
evm.TU.scaffold229.37	M1	histone H3; K11253 histone H3	http://www.genome.jp/dbget-bin/www_bget?ath:AT3G27360
evm.TU.scaffold2293.6	M1	probable isoaspartyl peptidase/L-asparaginase 2; K13051 beta-aspartyl-peptidase (threonine type) [EC:3.4.19.5]	http://www.genome.jp/dbget-bin/www_bget?ath:AT3G16150
evm.TU.scaffold23.103	M1	peroxidase 4; K00430 peroxidase [EC:1.11.1.7]	http://www.genome.jp/dbget-bin/www_bget?ath:AT1G14540
evm.TU.scaffold23.30	M1	hypothetical protein	http://www.genome.jp/dbget-bin/www_bget?ath:AT1G15385
evm.TU.scaffold23.31	M1	Lactoylglutathione lyase / glyoxalase I family protein	http://www.genome.jp/dbget-bin/www_bget?ath:AT1G15380
evm.TU.scaffold23.58	M1	phosphatidylserine synthase 1; K08730 phosphatidylserine synthase 2 [EC:2.7.8.29]	http://www.genome.jp/dbget-bin/www_bget?ath:AT1G15110
evm.TU.scaffold23.61	M1	putative glutamine amidotransferase	http://www.genome.jp/dbget-bin/www_bget?ath:AT1G15040
evm.TU.scaffold23.74	M1	PCR2; cadmium resistance protein 2	http://www.genome.jp/dbget-bin/www_bget?ath:AT1G14870
evm.TU.scaffold2309.6	M1	BGLU19; beta glucosidase 19; K01188 beta-glucosidase [EC:3.2.1.21]	http://www.genome.jp/dbget-bin/www_bget?ath:AT3G21370
evm.TU.scaffold2312.16	M1	auxin efflux carrier family protein; K07088	http://www.genome.jp/dbget-bin/www_bget?ath:AT5G65980
evm.TU.scaffold2321.3	M1	HTA6; histone H2A 6; K11251 histone H2A	http://www.genome.jp/dbget-bin/www_bget?ath:AT5G59870
evm.TU.scaffold2323.2	M1	STR18; thiosulfate sulfurtransferase 18	http://www.genome.jp/dbget-bin/www_bget?ath:AT5G66170
evm.TU.scaffold2330.15	M1	--	--
evm.TU.scaffold2331.9	M1	Kunitz family trypsin and protease inhibitor protein	http://www.genome.jp/dbget-bin/www_bget?ath:AT3G04320
evm.TU.scaffold2336.1	M1	EXPA10; expansin A10	http://www.genome.jp/dbget-bin/www_bget?ath:AT1G26770
evm.TU.scaffold2396.10_evm.TU.scaffold2396.9	M1	protein CER1-like 1	http://www.genome.jp/dbget-bin/www_bget?ath:AT1G02190
evm.TU.scaffold24.32	M1	ankyrin repeat-containing protein	http://www.genome.jp/dbget-bin/www_bget?ath:AT3G09550
evm.TU.scaffold2424.5	M1	defensin-like protein	http://www.genome.jp/dbget-bin/www_bget?ath:AT3G63360
evm.TU.scaffold243.7	M1	AGC2-1; AGC (cAMP-dependent, cGMP-dependent and protein kinase C) kinase family protein	http://www.genome.jp/dbget-bin/www_bget?ath:AT3G25250
evm.TU.scaffold2442.1	M1	CYP79C2; cytochrome p450 79c2	http://www.genome.jp/dbget-bin/www_bget?ath:AT1G58260
evm.TU.scaffold2455.8	M1	XND1; xylem NAC domain 1	http://www.genome.jp/dbget-bin/www_bget?ath:AT5G64530
evm.TU.scaffold246.17	M1	hypothetical protein	http://www.genome.jp/dbget-bin/www_bget?ath:AT2G20562
evm.TU.scaffold2462.3	M1	putative pectate lyase 8; K01728 pectate lyase [EC:4.2.2.2]	http://www.genome.jp/dbget-bin/www_bget?ath:AT3G07010
evm.TU.scaffold247.11	M1	FAD-binding and BBE domain-containing protein	http://www.genome.jp/dbget-bin/www_bget?ath:AT4G20840
evm.TU.scaffold2477.16	M1	MC5; metacaspase 5	http://www.genome.jp/dbget-bin/www_bget?ath:AT1G79330
evm.TU.scaffold25.3	M1	JAZ8; protein TIFY 5A	http://www.genome.jp/dbget-bin/www_bget?ath:AT1G30135
evm.TU.scaffold25.50	M1	CIPK18; CBL-interacting serine/threonine-protein kinase 18	http://www.genome.jp/dbget-bin/www_bget?ath:AT1G29230
evm.TU.scaffold250.18	M1	paraquat downregulated protein	http://www.genome.jp/dbget-bin/www_bget?ath:AT3G20340
evm.TU.scaffold250.22	M1	hypothetical protein	http://www.genome.jp/dbget-bin/www_bget?ath:AT3G20300
evm.TU.scaffold2507.9	M1	LTP6; lipid-transfer protein 6	http://www.genome.jp/dbget-bin/www_bget?ath:AT3G08770
evm.TU.scaffold254.20	M1	MYB95; putative transcription factor MYB95; K09422 myb proto-oncogene protein, plant	http://www.genome.jp/dbget-bin/www_bget?ath:AT1G74430
evm.TU.scaffold2552.5	M1	CIPK17; SNF1-related kinase	http://www.genome.jp/dbget-bin/www_bget?ath:AT1G48260
evm.TU.scaffold2559.17	M1	Regulator of Vps4 activity in the MVB pathway protein	http://www.genome.jp/dbget-bin/www_bget?ath:AT1G79910
evm.TU.scaffold256.10	M1	hypothetical protein	http://www.genome.jp/dbget-bin/www_bget?ath:AT1G09310
evm.TU.scaffold256.20	M1	putative wall-associated receptor kinase-like 11	http://www.genome.jp/dbget-bin/www_bget?ath:AT1G19390
evm.TU.scaffold256.24	M1	PP2-B15; phloem protein 2-B15	http://www.genome.jp/dbget-bin/www_bget?ath:AT1G09155
evm.TU.scaffold256.28	M1	SRC2; protein SRC2	http://www.genome.jp/dbget-bin/www_bget?ath:AT1G09070
evm.TU.scaffold256.40	M1	phosphoglycerate mutase-like protein	http://www.genome.jp/dbget-bin/www_bget?ath:AT1G08940
evm.TU.scaffold2568.14	M1	ETFQO; electron-transfer flavoprotein--ubiquinone oxidoreductase; K00311 electron-transferring-flavoprotein dehydrogenase [EC:1.5.5.1]	http://www.genome.jp/dbget-bin/www_bget?ath:AT2G43400
evm.TU.scaffold257.179	M1	NHO1; glycerol kinase; K00864 glycerol kinase [EC:2.7.1.30]	http://www.genome.jp/dbget-bin/www_bget?ath:AT1G80460
evm.TU.scaffold257.182	M1	D-glycerate 3-kinase; K15918 D-glycerate 3-kinase [EC:2.7.1.31]	http://www.genome.jp/dbget-bin/www_bget?ath:AT1G80380
evm.TU.scaffold257.76	M1	GSTU22; glutathione S-transferase TAU 22; K00799 glutathione S-transferase [EC:2.5.1.18]	http://www.genome.jp/dbget-bin/www_bget?ath:AT1G78340
evm.TU.scaffold257.80	M1	defensin-like protein 293	http://www.genome.jp/dbget-bin/www_bget?ath:AT2G04925
evm.TU.scaffold258.11	M1	PAP15; purple acid phosphatase 15	http://www.genome.jp/dbget-bin/www_bget?ath:AT3G07130
evm.TU.scaffold258.126	M1	MT2A; metallothionein 2A	http://www.genome.jp/dbget-bin/www_bget?ath:AT3G09390
evm.TU.scaffold258.72	M1	PLC2; phosphoinositide phospholipase C 2; K05857 phosphatidylinositol phospholipase C, delta [EC:3.1.4.11]	http://www.genome.jp/dbget-bin/www_bget?ath:AT3G08510
evm.TU.scaffold2594.10	M1	calcium-dependent lipid-binding domain-containing protein	http://www.genome.jp/dbget-bin/www_bget?ath:AT3G55470
evm.TU.scaffold26.11	M1	glycine-rich protein	http://www.genome.jp/dbget-bin/www_bget?ath:AT3G06780
evm.TU.scaffold26.130	M1	--	--
evm.TU.scaffold26.131	M1	Rubber elongation factor protein	http://www.genome.jp/dbget-bin/www_bget?ath:AT3G05500
evm.TU.scaffold26.132	M1	Rubber elongation factor protein	http://www.genome.jp/dbget-bin/www_bget?ath:AT3G05500
evm.TU.scaffold26.35	M1	MYB108; putative transcription factor MYB108; K09422 myb proto-oncogene protein, plant	http://www.genome.jp/dbget-bin/www_bget?ath:AT3G06490
evm.TU.scaffold26.41	M1	ATG8H; autophagy-related protein 8h; K08341 GABA(A) receptor-associated protein	http://www.genome.jp/dbget-bin/www_bget?ath:AT3G06420
evm.TU.scaffold26.84	M1	glycoprotein membrane precursor GPI-anchored protein	http://www.genome.jp/dbget-bin/www_bget?ath:AT3G06035
evm.TU.scaffold260.22	M1	hypothetical protein	http://www.genome.jp/dbget-bin/www_bget?ath:AT3G11740
evm.TU.scaffold260.44	M1	FLR1; leucine-rich repeat protein FLOR1	http://www.genome.jp/dbget-bin/www_bget?ath:AT3G12145
evm.TU.scaffold261.27	M1	hypothetical protein	http://www.genome.jp/dbget-bin/www_bget?ath:AT5G50830
evm.TU.scaffold2629.3	M1	DOGT1; UDP-glycosyltransferase 73C5; K13496 UDP-glucosyl transferase 73C [EC:2.4.1.-]	http://www.genome.jp/dbget-bin/www_bget?ath:AT2G36800
evm.TU.scaffold2631.5	M1	PLA-I{beta]2; phospholipase A1-Ibeta2	http://www.genome.jp/dbget-bin/www_bget?ath:AT4G16820
evm.TU.scaffold2642.2	M1	ESM1; epithiospecifier modifier 1	http://www.genome.jp/dbget-bin/www_bget?ath:AT3G14210
evm.TU.scaffold2649.8	M1	hypothetical protein	http://www.genome.jp/dbget-bin/www_bget?ath:AT1G02570
evm.TU.scaffold2665.1	M1	CSLD6; putative cellulose synthase-like protein D6	http://www.genome.jp/dbget-bin/www_bget?ath:AT1G32180
evm.TU.scaffold27.135	M1	hypothetical protein	http://www.genome.jp/dbget-bin/www_bget?ath:AT1G19020
evm.TU.scaffold27.56	M1	XCP2; xylem cysteine proteinase 2; K16290 xylem cysteine proteinase [EC:3.4.22.-]	http://www.genome.jp/dbget-bin/www_bget?ath:AT1G20850
evm.TU.scaffold27.83	M1	hypothetical protein	http://www.genome.jp/dbget-bin/www_bget?ath:AT1G20180
evm.TU.scaffold2702.2	M1	RING/U-box domain-containing protein	http://www.genome.jp/dbget-bin/www_bget?ath:AT2G44578
evm.TU.scaffold2702.3	M1	DIN2; beta-glucosidase 30; K01188 beta-glucosidase [EC:3.2.1.21]	http://www.genome.jp/dbget-bin/www_bget?ath:AT3G60140
evm.TU.scaffold2710.4	M1	glycosyltransferase family protein 2	http://www.genome.jp/dbget-bin/www_bget?ath:AT5G60700
evm.TU.scaffold2725.1	M1	CKX2; cytokinin oxidase 2; K00279 cytokinin dehydrogenase [EC:1.5.99.12]	http://www.genome.jp/dbget-bin/www_bget?ath:AT2G19500
evm.TU.scaffold2730.7	M1	hypothetical protein	http://www.genome.jp/dbget-bin/www_bget?ath:AT4G33980
evm.TU.scaffold2738.12	M1	UGE3; UDP-glucose 4-epimerase; K01784 UDP-glucose 4-epimerase [EC:5.1.3.2]	http://www.genome.jp/dbget-bin/www_bget?ath:AT1G63180
evm.TU.scaffold277.57	M1	histone H3; K11253 histone H3	http://www.genome.jp/dbget-bin/www_bget?ath:AT3G27360
evm.TU.scaffold28.17	M1	glycerophosphoryl diester phosphodiesterase family protein	http://www.genome.jp/dbget-bin/www_bget?ath:AT5G41080
evm.TU.scaffold28.60	M1	hypothetical protein	http://www.genome.jp/dbget-bin/www_bget?ath:AT5G40690
evm.TU.scaffold2818.2	M1	WRKY25; WRKY transcription factor 25; K13423 WRKY transcription factor 25	http://www.genome.jp/dbget-bin/www_bget?ath:AT2G30250
evm.TU.scaffold282.101	M1	AHP4; histidine-containing phosphotransfer protein 4; K14490 histidine-containing phosphotransfer peotein	http://www.genome.jp/dbget-bin/www_bget?ath:AT3G16360
evm.TU.scaffold2823.3	M1	hypothetical protein	http://www.genome.jp/dbget-bin/www_bget?ath:AT1G32928
evm.TU.scaffold283.6	M1	G4; chlorophyll synthase; K04040 chlorophyll synthase [EC:2.5.1.62]	http://www.genome.jp/dbget-bin/www_bget?ath:AT3G51820
evm.TU.scaffold2859.2	M1	hypothetical protein	http://www.genome.jp/dbget-bin/www_bget?ath:AT1G52342
evm.TU.scaffold286.16	M1	subtilase family protein	http://www.genome.jp/dbget-bin/www_bget?ath:AT5G45650
evm.TU.scaffold286.59	M1	hypothetical protein	http://www.genome.jp/dbget-bin/www_bget?ath:AT1G25400
evm.TU.scaffold286.60	M1	protein kinase superfamily protein	http://www.genome.jp/dbget-bin/www_bget?ath:AT1G25390
evm.TU.scaffold288.11	M1	MVA1; Hydroxymethylglutaryl-CoA synthase; K01641 hydroxymethylglutaryl-CoA synthase [EC:2.3.3.10]	http://www.genome.jp/dbget-bin/www_bget?ath:AT4G11820
evm.TU.scaffold29.47	M1	TIL; temperature-induced lipocalin TIL1; K03098 apolipoprotein D and lipocalin family protein	http://www.genome.jp/dbget-bin/www_bget?ath:AT5G58070
evm.TU.scaffold292.1	M1	hypothetical protein	http://www.genome.jp/dbget-bin/www_bget?ath:AT1G24575
evm.TU.scaffold292.47	M1	hypothetical protein	http://www.genome.jp/dbget-bin/www_bget?ath:AT1G68430
evm.TU.scaffold293.16	M1	hypothetical protein	http://www.genome.jp/dbget-bin/www_bget?ath:AT5G46090
evm.TU.scaffold293.30	M1	hypothetical protein	http://www.genome.jp/dbget-bin/www_bget?ath:AT5G46230
evm.TU.scaffold293.40	M1	putative F-box/kelch-repeat protein	http://www.genome.jp/dbget-bin/www_bget?ath:AT1G61540
evm.TU.scaffold295.12	M1	CRK10; cysteine-rich receptor-like protein kinase 10	http://www.genome.jp/dbget-bin/www_bget?ath:AT4G23180
evm.TU.scaffold2951.2	M1	probable isoaspartyl peptidase/L-asparaginase 2; K13051 beta-aspartyl-peptidase (threonine type) [EC:3.4.19.5]	http://www.genome.jp/dbget-bin/www_bget?ath:AT3G16150
evm.TU.scaffold296.8	M1	BGLU46; beta glucosidase 46; K05350 beta-glucosidase [EC:3.2.1.21]	http://www.genome.jp/dbget-bin/www_bget?ath:AT1G61820
evm.TU.scaffold299.36	M1	O-Glycosyl hydrolases family 17 protein	http://www.genome.jp/dbget-bin/www_bget?ath:AT3G55430
evm.TU.scaffold3.13	M1	--	--
evm.TU.scaffold3.132	M1	hydroxyproline-rich glycoprotein family protein	http://www.genome.jp/dbget-bin/www_bget?ath:AT1G72790
evm.TU.scaffold3.164	M1	KTI1; kunitz trypsin inhibitor 1	http://www.genome.jp/dbget-bin/www_bget?ath:AT1G73260
evm.TU.scaffold3.173	M1	KTI1; kunitz trypsin inhibitor 1	http://www.genome.jp/dbget-bin/www_bget?ath:AT1G73260
evm.TU.scaffold3.176	M1	Kunitz family trypsin and protease inhibitor protein	http://www.genome.jp/dbget-bin/www_bget?ath:AT1G73325
evm.TU.scaffold3.190	M1	NUDT21; nudix hydrolase 21; K07766 diphosphoinositol-polyphosphate diphosphatase [EC:3.6.1.52]	http://www.genome.jp/dbget-bin/www_bget?ath:AT1G73540
evm.TU.scaffold3.207	M1	hypothetical protein	http://www.genome.jp/dbget-bin/www_bget?ath:AT1G73750
evm.TU.scaffold3.232	M1	strictosidine synthase-like protein; K01757 strictosidine synthase [EC:4.3.3.2]	http://www.genome.jp/dbget-bin/www_bget?ath:AT1G74010
evm.TU.scaffold3.87	M1	ERO1; endoplasmic oxidoreductin-1; K10976 ERO1-like protein beta [EC:1.8.4.-]	http://www.genome.jp/dbget-bin/www_bget?ath:AT1G72280
evm.TU.scaffold3.89	M1	kunitz family trypsin and protease inhibitor protein	http://www.genome.jp/dbget-bin/www_bget?ath:AT1G72290
evm.TU.scaffold3.90	M1	kunitz family trypsin and protease inhibitor protein	http://www.genome.jp/dbget-bin/www_bget?ath:AT1G72290
evm.TU.scaffold3.92	M1	kunitz family trypsin and protease inhibitor protein	http://www.genome.jp/dbget-bin/www_bget?ath:AT1G72290
evm.TU.scaffold3.93	M1	kunitz family trypsin and protease inhibitor protein	http://www.genome.jp/dbget-bin/www_bget?ath:AT1G72290
evm.TU.scaffold300.34	M1	ATSDI1; protein SULPHUR DEFICIENCY-INDUCED 1	http://www.genome.jp/dbget-bin/www_bget?ath:AT5G48850
evm.TU.scaffold303.24	M1	trehalose-phosphate phosphatase G; K01087 trehalose 6-phosphate phosphatase [EC:3.1.3.12]	http://www.genome.jp/dbget-bin/www_bget?ath:AT4G22590
evm.TU.scaffold306.14	M1	putative cysteine proteinase; K01376 [EC:3.4.22.-]	http://www.genome.jp/dbget-bin/www_bget?ath:AT4G11320
evm.TU.scaffold306.17	M1	putative cysteine proteinase; K01376 [EC:3.4.22.-]	http://www.genome.jp/dbget-bin/www_bget?ath:AT4G11320
evm.TU.scaffold308.3	M1	cysteine proteinase-like protein	http://www.genome.jp/dbget-bin/www_bget?ath:AT2G27420
evm.TU.scaffold31.104	M1	2-Cys_Prx_B; 2-cysteine peroxiredoxin B; K03386 peroxiredoxin (alkyl hydroperoxide reductase subunit C) [EC:1.11.1.15]	http://www.genome.jp/dbget-bin/www_bget?ath:AT5G06290
evm.TU.scaffold310.26	M1	hypothetical protein	http://www.genome.jp/dbget-bin/www_bget?ath:AT4G28460
evm.TU.scaffold3104.3	M1	SLAH3; SLAC1 homologue 3	http://www.genome.jp/dbget-bin/www_bget?ath:AT5G24030
evm.TU.scaffold3115.8	M1	NPC4; non-specific phospholipase C4; K01114 phospholipase C [EC:3.1.4.3]	http://www.genome.jp/dbget-bin/www_bget?ath:AT3G03530
evm.TU.scaffold313.27	M1	MLP328; MLP-like protein 328	http://www.genome.jp/dbget-bin/www_bget?ath:AT2G01520
evm.TU.scaffold3149.1	M1	hypothetical protein	http://www.genome.jp/dbget-bin/www_bget?ath:AT2G33520
evm.TU.scaffold32.138	M1	metal ion binding protein	http://www.genome.jp/dbget-bin/www_bget?ath:AT3G56891
evm.TU.scaffold32.180	M1	hypothetical protein	http://www.genome.jp/dbget-bin/www_bget?ath:AT2G25460
evm.TU.scaffold32.21	M1	AGF2; AT-hook protein of GA feedback 2	http://www.genome.jp/dbget-bin/www_bget?ath:AT3G55560
evm.TU.scaffold32.40	M1	hypothetical protein	http://www.genome.jp/dbget-bin/www_bget?ath:AT3G55790
evm.TU.scaffold32.53	M1	JRG21; jasmonate-regulated protein JRG21	http://www.genome.jp/dbget-bin/www_bget?ath:AT3G55970
evm.TU.scaffold323.39	M1	hydroxyproline-rich glycoprotein-like protein	http://www.genome.jp/dbget-bin/www_bget?ath:AT1G63540
evm.TU.scaffold325.8	M1	XGD1; xylogalacturonan beta-1,3-xylosyltransferase; K18789 xylogalacturonan beta-1,3-xylosyltransferase [EC:2.4.2.41]	http://www.genome.jp/dbget-bin/www_bget?ath:AT5G33290
evm.TU.scaffold3256.1	M1	Yippee family putative zinc-binding protein	http://www.genome.jp/dbget-bin/www_bget?ath:AT3G11230
evm.TU.scaffold326.52	M1	VTE1; tocopherol cyclase; K09834 tocopherol cyclase [EC:5.5.1.24]	http://www.genome.jp/dbget-bin/www_bget?ath:AT4G32770
evm.TU.scaffold327.12	M1	hypothetical protein	http://www.genome.jp/dbget-bin/www_bget?ath:AT4G19390
evm.TU.scaffold327.22	M1	CML37; calcium-binding protein CML37; K13448 calcium-binding protein CML	http://www.genome.jp/dbget-bin/www_bget?ath:AT5G42380
evm.TU.scaffold327.51	M1	Late embryogenesis abundant-related protein	http://www.genome.jp/dbget-bin/www_bget?ath:AT1G54890
evm.TU.scaffold327.6	M1	histone H3; K11253 histone H3	http://www.genome.jp/dbget-bin/www_bget?ath:AT3G27360
evm.TU.scaffold3272.1	M1	--	--
evm.TU.scaffold33.98	M1	MUB4; membrane-anchored ubiquitin-fold protein 4	http://www.genome.jp/dbget-bin/www_bget?ath:AT3G26980
evm.TU.scaffold330.7	M1	RBP-DR1; RNA-binding protein-defense related 1; K13207 CUG-BP- and ETR3-like factor	http://www.genome.jp/dbget-bin/www_bget?ath:AT4G03110
evm.TU.scaffold337.25	M1	BIK1; serine/threonine-protein kinase BIK1	http://www.genome.jp/dbget-bin/www_bget?ath:AT2G39660
evm.TU.scaffold337.35	M1	alpha/beta-Hydrolases superfamily protein	http://www.genome.jp/dbget-bin/www_bget?ath:AT2G39420
evm.TU.scaffold3376.1	M1	HB-7; homeobox-leucine zipper protein ATHB-7	http://www.genome.jp/dbget-bin/www_bget?ath:AT2G46680
evm.TU.scaffold342.19	M1	ATG8H; autophagy-related protein 8h; K08341 GABA(A) receptor-associated protein	http://www.genome.jp/dbget-bin/www_bget?ath:AT3G06420
evm.TU.scaffold342.66	M1	serine/threonine-protein phosphatase PP1 isozyme 9; K06269 serine/threonine-protein phosphatase PP1 catalytic subunit [EC:3.1.3.16]	http://www.genome.jp/dbget-bin/www_bget?ath:AT3G05580
evm.TU.scaffold342.82	M1	ATL6; E3 ubiquitin-protein ligase ATL6; K10664 E3 ubiquitin-protein ligase ATL6/9/15/31/42/55 [EC:6.3.2.19]	http://www.genome.jp/dbget-bin/www_bget?ath:AT3G05200
evm.TU.scaffold343.17	M1	ERD5; proline dehydrogenase 1; K00318 proline dehydrogenase [EC:1.5.-.-]	http://www.genome.jp/dbget-bin/www_bget?ath:AT3G30775
evm.TU.scaffold3477.1	M1	PDR5; ABC transporter G family member 33	http://www.genome.jp/dbget-bin/www_bget?ath:AT2G37280
evm.TU.scaffold348.24	M1	SAUR-like auxin-responsive protein; K14488 SAUR family protein	http://www.genome.jp/dbget-bin/www_bget?ath:AT5G53590
evm.TU.scaffold349.18	M1	hypothetical protein	http://www.genome.jp/dbget-bin/www_bget?ath:AT2G22320
evm.TU.scaffold35.29	M1	hypothetical protein	http://www.genome.jp/dbget-bin/www_bget?ath:AT2G15760
evm.TU.scaffold355.25	M1	peptidase S41 family protein	http://www.genome.jp/dbget-bin/www_bget?ath:AT3G57680
evm.TU.scaffold355.39	M1	SIP2; putative galactinol--sucrose galactosyltransferase 2; K06617 raffinose synthase [EC:2.4.1.82]	http://www.genome.jp/dbget-bin/www_bget?ath:AT3G57520
evm.TU.scaffold3551.1	M1	ELMO/CED-12 family protein	http://www.genome.jp/dbget-bin/www_bget?ath:AT3G03610
evm.TU.scaffold3566.1	M1	regulator of chromosome condensation 1	http://www.genome.jp/dbget-bin/www_bget?ath:AT3G15430
evm.TU.scaffold36.28	M1	glycosyltransferase family protein 2	http://www.genome.jp/dbget-bin/www_bget?ath:AT5G60700
evm.TU.scaffold36.97	M1	RHF2A; E3 ubiquitin-protein ligase RHF2A; K19043 E3 ubiquitin-protein ligase RHF [EC:6.3.2.19]	http://www.genome.jp/dbget-bin/www_bget?ath:AT5G22000
evm.TU.scaffold361.2	M1	PIP1;4; plasma membrane intrinsic protein 1;4; K09872 aquaporin PIP	http://www.genome.jp/dbget-bin/www_bget?ath:AT4G00430
evm.TU.scaffold362.5	M1	MADS-box family protein	http://www.genome.jp/dbget-bin/www_bget?ath:AT3G12510
evm.TU.scaffold365.6	M1	ACA1; alpha carbonic anhydrase 1; K01674 carbonic anhydrase [EC:4.2.1.1]	http://www.genome.jp/dbget-bin/www_bget?ath:AT3G52720
evm.TU.scaffold366.29	M1	CNBT1; cyclic nucleotide-binding transporter 1; K05391 cyclic nucleotide gated channel, other eukaryote	http://www.genome.jp/dbget-bin/www_bget?ath:AT3G17700
evm.TU.scaffold366.41	M1	putative lipid transfer protein	http://www.genome.jp/dbget-bin/www_bget?ath:AT4G30880
evm.TU.scaffold367.23	M1	HCF106; sec-independent protein translocase protein TATB	http://www.genome.jp/dbget-bin/www_bget?ath:AT5G52440
evm.TU.scaffold372.4	M1	VQ motif-containing protein	http://www.genome.jp/dbget-bin/www_bget?ath:AT2G22880
evm.TU.scaffold373.30	M1	PR-6 proteinase inhibitor family protein	http://www.genome.jp/dbget-bin/www_bget?ath:AT2G38870
evm.TU.scaffold373.31	M1	BZO2H1; basic leucine zipper 10	http://www.genome.jp/dbget-bin/www_bget?ath:AT4G02640
evm.TU.scaffold379.4	M1	PMI2; plastid movement impaired 2 protein	http://www.genome.jp/dbget-bin/www_bget?ath:AT1G66480
evm.TU.scaffold38.31	M1	ACAT2; acetoacetyl-CoA thiolase 2; K00626 acetyl-CoA C-acetyltransferase [EC:2.3.1.9]	http://www.genome.jp/dbget-bin/www_bget?ath:AT5G48230
evm.TU.scaffold38.47	M1	RS27A; 40S ribosomal protein S27-2; K02978 small subunit ribosomal protein S27e	http://www.genome.jp/dbget-bin/www_bget?ath:AT3G61110
evm.TU.scaffold38.65	M1	ERD5; proline dehydrogenase 1; K00318 proline dehydrogenase [EC:1.5.-.-]	http://www.genome.jp/dbget-bin/www_bget?ath:AT3G30775
evm.TU.scaffold387.15	M1	hypothetical protein	http://www.genome.jp/dbget-bin/www_bget?ath:AT5G55060
evm.TU.scaffold387.57	M1	hypothetical protein	http://www.genome.jp/dbget-bin/www_bget?ath:AT5G54300
evm.TU.scaffold3901.2	M1	pollen Ole e 1 allergen and extensin family protein	http://www.genome.jp/dbget-bin/www_bget?ath:AT3G16660
evm.TU.scaffold395.14	M1	WRKY8; putative WRKY transcription factor 8	http://www.genome.jp/dbget-bin/www_bget?ath:AT5G46350
evm.TU.scaffold397.12	M1	ANAC087; NAC domain containing protein 87	http://www.genome.jp/dbget-bin/www_bget?ath:AT5G18270
evm.TU.scaffold4.111	M1	S-adenosylmethionine-dependent methyltransferase domain-containing protein	http://www.genome.jp/dbget-bin/www_bget?ath:AT1G69523
evm.TU.scaffold4.171	M1	IDA; protein IDA	http://www.genome.jp/dbget-bin/www_bget?ath:AT1G68765
evm.TU.scaffold4.85	M1	putative protein serine/threonine kinase; K04733 interleukin-1 receptor-associated kinase 4 [EC:2.7.11.1]	http://www.genome.jp/dbget-bin/www_bget?ath:AT1G69790
evm.TU.scaffold40.72	M1	putative protein kinase	http://www.genome.jp/dbget-bin/www_bget?ath:AT1G76360
evm.TU.scaffold40.80	M1	hypothetical protein	http://www.genome.jp/dbget-bin/www_bget?ath:AT1G76600
evm.TU.scaffold400.32	M1	PSK5; putative phytosulfokines 5 precursor	http://www.genome.jp/dbget-bin/www_bget?ath:AT5G65870
evm.TU.scaffold400.8	M1	ZF1; zinc-finger protein 1	http://www.genome.jp/dbget-bin/www_bget?ath:AT5G67450
evm.TU.scaffold401.18	M1	RABA1e; RAB GTPase homolog A1E	http://www.genome.jp/dbget-bin/www_bget?ath:AT4G18430
evm.TU.scaffold406.27	M1	AGAL2; alpha-galactosidase 2; K07407 alpha-galactosidase [EC:3.2.1.22]	http://www.genome.jp/dbget-bin/www_bget?ath:AT5G08370
evm.TU.scaffold4060.1	M1	DRT100; DNA-damage-repair/toleration protein DRT100	http://www.genome.jp/dbget-bin/www_bget?ath:AT3G12610
evm.TU.scaffold407.14	M1	MYB28; transcription factor MYB28; K09422 myb proto-oncogene protein, plant	http://www.genome.jp/dbget-bin/www_bget?ath:AT5G61420
evm.TU.scaffold408.11	M1	probable pectinesterase/pectinesterase inhibitor 20; K01051 pectinesterase [EC:3.1.1.11]	http://www.genome.jp/dbget-bin/www_bget?ath:AT2G47550
evm.TU.scaffold41.28	M1	nodulin MtN21-like transporter family protein	http://www.genome.jp/dbget-bin/www_bget?ath:AT4G30420
evm.TU.scaffold41.47	M1	CDEF1; GDSL esterase/lipase	http://www.genome.jp/dbget-bin/www_bget?ath:AT4G30140
evm.TU.scaffold411.26	M1	3-oxo-5-alpha-steroid 4-dehydrogenase family protein	http://www.genome.jp/dbget-bin/www_bget?ath:AT5G16010
evm.TU.scaffold412.15	M1	hydrolase, alpha/beta fold family protein	http://www.genome.jp/dbget-bin/www_bget?ath:AT3G24420
evm.TU.scaffold424.42	M1	ALDH11A3; NADP-dependent glyceraldehyde-3-phosphate dehydrogenase; K00131 glyceraldehyde-3-phosphate dehydrogenase (NADP+) [EC:1.2.1.9]	http://www.genome.jp/dbget-bin/www_bget?ath:AT2G24270
evm.TU.scaffold425.9	M1	hypothetical protein	http://www.genome.jp/dbget-bin/www_bget?ath:AT2G46940
evm.TU.scaffold43.32	M1	5PTASE11; Type I inositol-1,4,5-trisphosphate 5-phosphatase 11	http://www.genome.jp/dbget-bin/www_bget?ath:AT1G47510
evm.TU.scaffold434.67	M1	glutaredoxin-C14	http://www.genome.jp/dbget-bin/www_bget?ath:AT3G62960
evm.TU.scaffold436.3	M1	NRT1.5; nitrate transporter 1.5	http://www.genome.jp/dbget-bin/www_bget?ath:AT1G32450
evm.TU.scaffold4363.5	M1	hypothetical protein	http://www.genome.jp/dbget-bin/www_bget?ath:AT2G43250
evm.TU.scaffold439.23	M1	AGT2; alanine:glyoxylate aminotransferase 2; K00827 alanine-glyoxylate transaminase / (R)-3-amino-2-methylpropionate-pyruvate transaminase [EC:2.6.1.44 2.6.1.40]	http://www.genome.jp/dbget-bin/www_bget?ath:AT4G39660
evm.TU.scaffold439.24	M1	hypothetical protein	http://www.genome.jp/dbget-bin/www_bget?ath:AT4G39610
evm.TU.scaffold442.20	M1	seven in absentia (SINA) domain-containing protein	http://www.genome.jp/dbget-bin/www_bget?ath:AT3G13672
evm.TU.scaffold444.23	M1	SPX1; SPX domain-containing protein 1	http://www.genome.jp/dbget-bin/www_bget?ath:AT5G20150
evm.TU.scaffold444.41	M1	RPT6A; regulatory particle triple-A ATPase 6A; K03066 26S proteasome regulatory subunit T6	http://www.genome.jp/dbget-bin/www_bget?ath:AT5G19990
evm.TU.scaffold452.8	M1	rhamnogalacturonate lyase-like protein; K18195 rhamnogalacturonan endolyase [EC:4.2.2.23]	http://www.genome.jp/dbget-bin/www_bget?ath:AT2G22620
evm.TU.scaffold459.10	M1	NAC036; NAC transcription factor family protein NAC036	http://www.genome.jp/dbget-bin/www_bget?ath:AT2G17040
evm.TU.scaffold46.23	M1	LTI65; protein LOW-TEMPERATURE-INDUCED 65	http://www.genome.jp/dbget-bin/www_bget?ath:AT5G52300
evm.TU.scaffold462.11	M1	HSFA2; heat stress transcription factor A-2; K09419 heat shock transcription factor, other eukaryote	http://www.genome.jp/dbget-bin/www_bget?ath:AT2G26150
evm.TU.scaffold462.21	M1	LTP4; non-specific lipid-transfer protein 4	http://www.genome.jp/dbget-bin/www_bget?ath:AT5G59310
evm.TU.scaffold467.29	M1	pollen Ole e 1 allergen and extensin family protein	http://www.genome.jp/dbget-bin/www_bget?ath:AT3G16660
evm.TU.scaffold471.25	M1	bHLH093; transcription factor bHLH93	http://www.genome.jp/dbget-bin/www_bget?ath:AT5G65640
evm.TU.scaffold4743.2	M1	protein kinase superfamily protein	http://www.genome.jp/dbget-bin/www_bget?ath:AT2G39110
evm.TU.scaffold476.9	M1	ELIP1; chlorophyll A-B binding, early light-inducible protein	http://www.genome.jp/dbget-bin/www_bget?ath:AT3G22840
evm.TU.scaffold48.109	M1	MLO12; protein MILDEW RESISTANCE LOCUS O 12; K08472 mlo protein	http://www.genome.jp/dbget-bin/www_bget?ath:AT2G39200
evm.TU.scaffold48.123	M1	PR-6 proteinase inhibitor family protein	http://www.genome.jp/dbget-bin/www_bget?ath:AT2G38870
evm.TU.scaffold48.15	M1	putative peptide/nitrate transporter	http://www.genome.jp/dbget-bin/www_bget?ath:AT2G40460
evm.TU.scaffold48.30	M1	DREB2C; dehydration-responsive element-binding protein 2C	http://www.genome.jp/dbget-bin/www_bget?ath:AT2G40340
evm.TU.scaffold48.68	M1	P5CS1; delta1-pyrroline-5-carboxylate synthase 1; K12657 delta-1-pyrroline-5-carboxylate synthetase [EC:2.7.2.11 1.2.1.41]	http://www.genome.jp/dbget-bin/www_bget?ath:AT2G39800
evm.TU.scaffold48.80	M1	BIK1; serine/threonine-protein kinase BIK1	http://www.genome.jp/dbget-bin/www_bget?ath:AT2G39660
evm.TU.scaffold48.84	M1	hypothetical protein	http://www.genome.jp/dbget-bin/www_bget?ath:AT2G39518
evm.TU.scaffold483.19	M1	HTB2; histone H2B; K11252 histone H2B	http://www.genome.jp/dbget-bin/www_bget?ath:AT5G22880
evm.TU.scaffold49.49	M1	KAT3; potassium channel KAT3	http://www.genome.jp/dbget-bin/www_bget?ath:AT4G32650
evm.TU.scaffold5.195	M1	--	--
evm.TU.scaffold5.22	M1	UNE18; oxysterol-binding protein-related protein 3A	http://www.genome.jp/dbget-bin/www_bget?ath:AT5G02100
evm.TU.scaffold5.99	M1	hypothetical protein	http://www.genome.jp/dbget-bin/www_bget?ath:AT5G03210
evm.TU.scaffold50.32	M1	CAD5; cinnamyl alcohol dehydrogenase 5; K00083 cinnamyl-alcohol dehydrogenase [EC:1.1.1.195]	http://www.genome.jp/dbget-bin/www_bget?ath:AT4G34230
evm.TU.scaffold505.6	M1	--	--
evm.TU.scaffold508.8	M1	histone H4; K11254 histone H4	http://www.genome.jp/dbget-bin/www_bget?ath:AT3G53730
evm.TU.scaffold51.17	M1	bifunctional inhibitor/lipid-transfer protein/seed storage 2S albumin-like protein	http://www.genome.jp/dbget-bin/www_bget?ath:AT1G48750
evm.TU.scaffold51.45	M1	MAPKKK17; mitogen-activated protein kinase kinase kinase 17	http://www.genome.jp/dbget-bin/www_bget?ath:AT2G32510
evm.TU.scaffold51.85	M1	hypothetical protein	http://www.genome.jp/dbget-bin/www_bget?ath:AT2G31945
evm.TU.scaffold514.101	M1	ANAC087; NAC domain containing protein 87	http://www.genome.jp/dbget-bin/www_bget?ath:AT5G18270
evm.TU.scaffold514.64	M1	SAUR-like auxin-responsive protein; K14488 SAUR family protein	http://www.genome.jp/dbget-bin/www_bget?ath:AT5G18020
evm.TU.scaffold514.71	M1	SAUR-like auxin-responsive protein; K14488 SAUR family protein	http://www.genome.jp/dbget-bin/www_bget?ath:AT5G18020
evm.TU.scaffold514.72	M1	SAUR-like auxin-responsive protein; K14488 SAUR family protein	http://www.genome.jp/dbget-bin/www_bget?ath:AT5G18020
evm.TU.scaffold52.280	M1	BES1; protein brassinazole-resistant 2; K14503 brassinosteroid resistant 1/2	http://www.genome.jp/dbget-bin/www_bget?ath:AT1G19350
evm.TU.scaffold52.73	M1	putative serine/threonine kinase	http://www.genome.jp/dbget-bin/www_bget?ath:AT1G16670
evm.TU.scaffold520.66	M1	TFL2; chromo domain-containing protein LHP1	http://www.genome.jp/dbget-bin/www_bget?ath:AT5G17690
evm.TU.scaffold520.67	M1	--	--
evm.TU.scaffold5204.3	M1	PIP2B; aquaporin PIP2-2; K09872 aquaporin PIP	http://www.genome.jp/dbget-bin/www_bget?ath:AT2G37170
evm.TU.scaffold5204.4	M1	PIP2B; aquaporin PIP2-2; K09872 aquaporin PIP	http://www.genome.jp/dbget-bin/www_bget?ath:AT2G37170
evm.TU.scaffold523.28	M1	chaperone DnaJ-domain containing protein	http://www.genome.jp/dbget-bin/www_bget?ath:AT3G13310
evm.TU.scaffold526.23	M1	FAD-binding Berberine family protein	http://www.genome.jp/dbget-bin/www_bget?ath:AT5G44390
evm.TU.scaffold536.42	M1	bifunctional inhibitor/lipid-transfer protein/seed storage 2S albumin-like protein	http://www.genome.jp/dbget-bin/www_bget?ath:AT5G55450
evm.TU.scaffold54.11	M1	probable folate-biopterin transporter 4	http://www.genome.jp/dbget-bin/www_bget?ath:AT5G54860
evm.TU.scaffold542.19	M1	hydroxyproline-rich glycoprotein-like protein	http://www.genome.jp/dbget-bin/www_bget?ath:AT1G61080
evm.TU.scaffold544.11	M1	SVB; protein SMALLER WITH VARIABLE BRANCHES	http://www.genome.jp/dbget-bin/www_bget?ath:AT1G56580
evm.TU.scaffold547.17	M1	hypothetical protein	http://www.genome.jp/dbget-bin/www_bget?ath:AT2G31985
evm.TU.scaffold547.23	M1	Acyl-CoA N-acyltransferases (NAT) superfamily protein	http://www.genome.jp/dbget-bin/www_bget?ath:AT2G32030
evm.TU.scaffold547.27	M1	hypothetical protein	http://www.genome.jp/dbget-bin/www_bget?ath:AT2G32210
evm.TU.scaffold549.8	M1	glycosyl hydrolase family protein; K05349 beta-glucosidase [EC:3.2.1.21]	http://www.genome.jp/dbget-bin/www_bget?ath:AT3G47000
evm.TU.scaffold551.33	M1	ASD2; alpha-L-arabinofuranosidase 2; K01209 alpha-N-arabinofuranosidase [EC:3.2.1.55]	http://www.genome.jp/dbget-bin/www_bget?ath:AT5G26120
evm.TU.scaffold553.20	M1	Rhamnogalacturonate lyase family protein; K18195 rhamnogalacturonan endolyase [EC:4.2.2.23]	http://www.genome.jp/dbget-bin/www_bget?ath:AT4G38030
evm.TU.scaffold553.22	M1	ELI3-2; cinnamyl alcohol dehydrogenase 8; K00083 cinnamyl-alcohol dehydrogenase [EC:1.1.1.195]	http://www.genome.jp/dbget-bin/www_bget?ath:AT4G37990
evm.TU.scaffold553.9	M1	RING-H2 finger protein ATL32	http://www.genome.jp/dbget-bin/www_bget?ath:AT4G40070
evm.TU.scaffold557.25	M1	CEJ1; ethylene-responsive transcription factor ERF011	http://www.genome.jp/dbget-bin/www_bget?ath:AT3G50260
evm.TU.scaffold56.129	M1	ribonuclease T2; K01166 ribonuclease T2 [EC:3.1.27.1]	http://www.genome.jp/dbget-bin/www_bget?ath:AT1G14220
evm.TU.scaffold56.207	M1	Lactoylglutathione lyase / glyoxalase I family protein	http://www.genome.jp/dbget-bin/www_bget?ath:AT1G15380
evm.TU.scaffold56.208	M1	hypothetical protein	http://www.genome.jp/dbget-bin/www_bget?ath:AT1G15385
evm.TU.scaffold56.231	M1	--	--
evm.TU.scaffold56.84	M1	hypothetical protein	http://www.genome.jp/dbget-bin/www_bget?ath:AT1G13520
evm.TU.scaffold56.86	M1	hypothetical protein	http://www.genome.jp/dbget-bin/www_bget?ath:AT1G13520
evm.TU.scaffold57.129_evm.TU.scaffold57.131	M1	hypothetical protein	http://www.genome.jp/dbget-bin/www_bget?ath:AT3G54520
evm.TU.scaffold57.13	M1	hypothetical protein	http://www.genome.jp/dbget-bin/www_bget?ath:AT1G67920
evm.TU.scaffold57.14	M1	glycine-rich protein	http://www.genome.jp/dbget-bin/www_bget?ath:AT1G67870
evm.TU.scaffold57.18	M1	putative protein phosphatase 2C 14	http://www.genome.jp/dbget-bin/www_bget?ath:AT1G67820
evm.TU.scaffold57.81	M1	Adenine nucleotide alpha hydrolases-like superfamily protein	http://www.genome.jp/dbget-bin/www_bget?ath:AT3G53990
evm.TU.scaffold576.9	M1	TBL35; protein trichome birefringence-like 35	http://www.genome.jp/dbget-bin/www_bget?ath:AT5G01620
evm.TU.scaffold577.35	M1	polyketide cyclase/dehydrase and lipid transport superfamily protein	http://www.genome.jp/dbget-bin/www_bget?ath:AT1G23120
evm.TU.scaffold577.69	M1	major latex family protein	http://www.genome.jp/dbget-bin/www_bget?ath:AT1G24000
evm.TU.scaffold58.34	M1	DIN9; mannose-6-phosphate isomerase; K01809 mannose-6-phosphate isomerase [EC:5.3.1.8]	http://www.genome.jp/dbget-bin/www_bget?ath:AT1G67070
evm.TU.scaffold58.8	M1	F-box/kelch-repeat protein	http://www.genome.jp/dbget-bin/www_bget?ath:AT1G67480
evm.TU.scaffold584.19	M1	CKX5; cytokinin dehydrogenase 5; K00279 cytokinin dehydrogenase [EC:1.5.99.12]	http://www.genome.jp/dbget-bin/www_bget?ath:AT1G75450
evm.TU.scaffold585.25	M1	CYP71B11; cytochrome P450 71B11; K00517 [EC:1.14.-.-]	http://www.genome.jp/dbget-bin/www_bget?ath:AT5G25120
evm.TU.scaffold586.25	M1	chaperone DnaJ-domain containing protein	http://www.genome.jp/dbget-bin/www_bget?ath:AT5G21430
evm.TU.scaffold586.49	M1	FAD/NAD(P)-binding oxidoreductase family protein	http://www.genome.jp/dbget-bin/www_bget?ath:AT5G22140
evm.TU.scaffold595.10	M1	OFP5; ovate family protein 5	http://www.genome.jp/dbget-bin/www_bget?ath:AT4G18830
evm.TU.scaffold598.56	M1	putative pectinesterase/pectinesterase inhibitor 59; K01051 pectinesterase [EC:3.1.1.11]	http://www.genome.jp/dbget-bin/www_bget?ath:AT5G51490
evm.TU.scaffold598.58	M1	LTP4; non-specific lipid-transfer protein 4	http://www.genome.jp/dbget-bin/www_bget?ath:AT5G59310
evm.TU.scaffold6.133	M1	hypothetical protein	http://www.genome.jp/dbget-bin/www_bget?ath:AT2G44260
evm.TU.scaffold6.20	M1	PI4K_GAMMA_4; phosphoinositide 4-kinase gamma 4	http://www.genome.jp/dbget-bin/www_bget?ath:AT2G46500
evm.TU.scaffold60.176	M1	BON3; protein BONZAI 3	http://www.genome.jp/dbget-bin/www_bget?ath:AT1G08860
evm.TU.scaffold60.18	M1	1-aminocyclopropane-1-carboxylate oxidase; K05933 aminocyclopropanecarboxylate oxidase [EC:1.14.17.4]	http://www.genome.jp/dbget-bin/www_bget?ath:AT1G12010
evm.TU.scaffold60.19	M1	stigma-specific stig1 family protein	http://www.genome.jp/dbget-bin/www_bget?ath:AT1G11925
evm.TU.scaffold60.191	M1	THA1; threonine aldolase; K01620 threonine aldolase [EC:4.1.2.5]	http://www.genome.jp/dbget-bin/www_bget?ath:AT1G08630
evm.TU.scaffold60.2	M1	putative flavin monooxygenase	http://www.genome.jp/dbget-bin/www_bget?ath:AT1G12200
evm.TU.scaffold60.21	M1	stigma-specific stig1 family protein	http://www.genome.jp/dbget-bin/www_bget?ath:AT1G11925
evm.TU.scaffold60.240	M1	pentatricopeptide repeat-containing protein	http://www.genome.jp/dbget-bin/www_bget?ath:AT1G07590
evm.TU.scaffold60.90	M1	alpha/beta-Hydrolases superfamily protein	http://www.genome.jp/dbget-bin/www_bget?ath:AT1G10740
evm.TU.scaffold600.1	M1	BGL2; beta 1,3-glucanase 2	http://www.genome.jp/dbget-bin/www_bget?ath:AT3G57260
evm.TU.scaffold609.40	M1	CYP72A15; cytochrome P450, family 72, subfamily A, polypeptide 15	http://www.genome.jp/dbget-bin/www_bget?ath:AT3G14690
evm.TU.scaffold61.40	M1	hypothetical protein	http://www.genome.jp/dbget-bin/www_bget?ath:AT2G01300
evm.TU.scaffold611.9	M1	MYB15; myb domain protein 15; K09422 myb proto-oncogene protein, plant	http://www.genome.jp/dbget-bin/www_bget?ath:AT3G23250
evm.TU.scaffold618.2	M1	--	--
evm.TU.scaffold625.4	M1	TBL9; protein trichome birefringence-like 9	http://www.genome.jp/dbget-bin/www_bget?ath:AT5G06230
evm.TU.scaffold628.27	M1	hypothetical protein	http://www.genome.jp/dbget-bin/www_bget?ath:AT4G33467
evm.TU.scaffold628.49	M1	hypothetical protein	http://www.genome.jp/dbget-bin/www_bget?ath:AT4G33145
evm.TU.scaffold629.20	M1	ATG8E; autophagy-related protein 8e; K08341 GABA(A) receptor-associated protein	http://www.genome.jp/dbget-bin/www_bget?ath:AT2G45170
evm.TU.scaffold629.26	M1	putative metal tolerance protein C3	http://www.genome.jp/dbget-bin/www_bget?ath:AT3G58060
evm.TU.scaffold63.50	M1	HVA22E; HVA22-like protein E; K17279 receptor expression-enhancing protein 5/6	http://www.genome.jp/dbget-bin/www_bget?ath:AT5G50720
evm.TU.scaffold63.71	M1	hypothetical protein	http://www.genome.jp/dbget-bin/www_bget?ath:AT4G25170
evm.TU.scaffold633.3	M1	hypothetical protein	http://www.genome.jp/dbget-bin/www_bget?ath:AT2G45990
evm.TU.scaffold633.31	M1	PP2C5; protein phosphatase 2C 5	http://www.genome.jp/dbget-bin/www_bget?ath:AT2G40180
evm.TU.scaffold633.38	M1	pollen Ole e 1 allergen and extensin family protein	http://www.genome.jp/dbget-bin/www_bget?ath:AT2G40113
evm.TU.scaffold639.8	M1	hypothetical protein	http://www.genome.jp/dbget-bin/www_bget?ath:AT2G44260
evm.TU.scaffold64.16	M1	ERD5; proline dehydrogenase 1; K00318 proline dehydrogenase [EC:1.5.-.-]	http://www.genome.jp/dbget-bin/www_bget?ath:AT3G30775
evm.TU.scaffold644.10	M1	ADG1; glucose-1-phosphate adenylyltransferase small subunit; K00975 glucose-1-phosphate adenylyltransferase [EC:2.7.7.27]	http://www.genome.jp/dbget-bin/www_bget?ath:AT5G48300
evm.TU.scaffold648.11	M1	AIG2L; avirulence induced protein 2 like protein	http://www.genome.jp/dbget-bin/www_bget?ath:AT5G39720
evm.TU.scaffold648.24	M1	nodulin MtN21 /EamA-like transporter family protein	http://www.genome.jp/dbget-bin/www_bget?ath:AT5G40240
evm.TU.scaffold65.41	M1	SPH8; S-protein homologue 8	http://www.genome.jp/dbget-bin/www_bget?ath:AT5G38435
evm.TU.scaffold651.28	M1	hypothetical protein	http://www.genome.jp/dbget-bin/www_bget?ath:AT3G19615
evm.TU.scaffold653.15	M1	SEX4; phosphoglucan phosphatase DSP4	http://www.genome.jp/dbget-bin/www_bget?ath:AT3G52180
evm.TU.scaffold656.7	M1	--	--
evm.TU.scaffold659.16	M1	hypothetical protein	http://www.genome.jp/dbget-bin/www_bget?ath:AT4G27580
evm.TU.scaffold66.41	M1	late embryogenesis abundant domain-containing protein	http://www.genome.jp/dbget-bin/www_bget?ath:AT2G42560
evm.TU.scaffold661.99	M1	putative protein phosphatase 2C 2	http://www.genome.jp/dbget-bin/www_bget?ath:AT1G07160
evm.TU.scaffold67.28	M1	OFP2; ovate family protein 2	http://www.genome.jp/dbget-bin/www_bget?ath:AT2G30400
evm.TU.scaffold67.29	M1	OFP17; ovate family protein 17	http://www.genome.jp/dbget-bin/www_bget?ath:AT2G30395
evm.TU.scaffold67.48	M1	RGLG1; E3 ubiquitin-protein ligase RGLG1; K16280 E3 ubiquitin-protein ligase RGLG [EC:6.3.2.19]	http://www.genome.jp/dbget-bin/www_bget?ath:AT3G01650
evm.TU.scaffold67.65	M1	SPFH/Band 7/PHB domain-containing membrane-associated protein	http://www.genome.jp/dbget-bin/www_bget?ath:AT3G01290
evm.TU.scaffold67.87	M1	TMAC2; Ninja-family protein AFP4	http://www.genome.jp/dbget-bin/www_bget?ath:AT3G02140
evm.TU.scaffold672.10	M1	AGD13; putative ADP-ribosylation factor GTPase-activating protein AGD13; K12486 stromal membrane-associated protein	http://www.genome.jp/dbget-bin/www_bget?ath:AT4G05330
evm.TU.scaffold685.4	M1	hypothetical protein	http://www.genome.jp/dbget-bin/www_bget?ath:AT5G51390
evm.TU.scaffold687.16	M1	ROPGEF13; RHO guanyl-nucleotide exchange factor 13	http://www.genome.jp/dbget-bin/www_bget?ath:AT3G16130
evm.TU.scaffold69.11	M1	LOG1; cytokinin riboside 5'-monophosphate phosphoribohydrolase LOG1; K06966	http://www.genome.jp/dbget-bin/www_bget?ath:AT2G28305
evm.TU.scaffold69.23	M1	hypothetical protein	http://www.genome.jp/dbget-bin/www_bget?ath:AT2G28400
evm.TU.scaffold69.33	M1	BGAL8; beta-galactosidase 8	http://www.genome.jp/dbget-bin/www_bget?ath:AT2G28470
evm.TU.scaffold692.27	M1	Rubber elongation factor protein	http://www.genome.jp/dbget-bin/www_bget?ath:AT3G05500
evm.TU.scaffold694.24	M1	CWLP; cell wall-plasma membrane linker protein	http://www.genome.jp/dbget-bin/www_bget?ath:AT3G22120
evm.TU.scaffold699.15	M1	CDSP32; thioredoxin-like protein CDSP32	http://www.genome.jp/dbget-bin/www_bget?ath:AT1G76080
evm.TU.scaffold70.23	M1	Galactosyltransferase family protein	http://www.genome.jp/dbget-bin/www_bget?ath:AT5G57500
evm.TU.scaffold700.32	M1	hypothetical protein	http://www.genome.jp/dbget-bin/www_bget?ath:AT1G67850
evm.TU.scaffold701.25	M1	COR413-PM2; cold-regulated 413-plasma membrane 2	http://www.genome.jp/dbget-bin/www_bget?ath:AT3G50830
evm.TU.scaffold704.26	M1	THA1; threonine aldolase; K01620 threonine aldolase [EC:4.1.2.5]	http://www.genome.jp/dbget-bin/www_bget?ath:AT1G08630
evm.TU.scaffold704.77	M1	C3HC4-type RING finger-containing protein	http://www.genome.jp/dbget-bin/www_bget?ath:AT1G08050
evm.TU.scaffold71.71	M1	ERF6; ethylene responsive element binding factor 6; K09286 EREBP-like factor	http://www.genome.jp/dbget-bin/www_bget?ath:AT4G17490
evm.TU.scaffold71.72	M1	ERF-1; ethylene-responsive transcription factor 1A; K09286 EREBP-like factor	http://www.genome.jp/dbget-bin/www_bget?ath:AT4G17500
evm.TU.scaffold718.5	M1	KDEL-tailed cysteine endopeptidase CEP2; K16292 KDEL-tailed cysteine endopeptidase [EC:3.4.22.-]	http://www.genome.jp/dbget-bin/www_bget?ath:AT3G48340
evm.TU.scaffold72.45	M1	SRO2; probable inactive poly [ADP-ribose] polymerase SRO2	http://www.genome.jp/dbget-bin/www_bget?ath:AT1G23550
evm.TU.scaffold721.6	M1	hypothetical protein	http://www.genome.jp/dbget-bin/www_bget?ath:AT2G01300
evm.TU.scaffold725.14	M1	CYSD2; cysteine synthase D2; K01738 cysteine synthase A [EC:2.5.1.47]	http://www.genome.jp/dbget-bin/www_bget?ath:AT5G28020
evm.TU.scaffold726.25	M1	histone H4; K11254 histone H4	http://www.genome.jp/dbget-bin/www_bget?ath:AT3G53730
evm.TU.scaffold726.40	M1	MLO3; MLO-like protein 3; K08472 mlo protein	http://www.genome.jp/dbget-bin/www_bget?ath:AT3G45290
evm.TU.scaffold73.169	M1	ABC transporter G family member 2	http://www.genome.jp/dbget-bin/www_bget?ath:AT2G37360
evm.TU.scaffold73.177	M1	zinc finger protein ZAT11	http://www.genome.jp/dbget-bin/www_bget?ath:AT2G37430
evm.TU.scaffold73.182	M1	nodulin MtN21-like transporter family protein	http://www.genome.jp/dbget-bin/www_bget?ath:AT2G37460
evm.TU.scaffold73.19	M1	Protein kinase family protein	http://www.genome.jp/dbget-bin/www_bget?ath:AT5G09890
evm.TU.scaffold73.205	M1	hypothetical protein	http://www.genome.jp/dbget-bin/www_bget?ath:AT2G37750
evm.TU.scaffold73.223	M1	SOUL-1; heam-binding protein 2	http://www.genome.jp/dbget-bin/www_bget?ath:AT2G37970
evm.TU.scaffold73.239	M1	2-oxoglutarate (2OG) and Fe(II)-dependent oxygenase-like protein	http://www.genome.jp/dbget-bin/www_bget?ath:AT2G38240
evm.TU.scaffold73.80	M1	YLS9; protein NDR1/HIN1-like 10	http://www.genome.jp/dbget-bin/www_bget?ath:AT2G35980
evm.TU.scaffold733.12	M1	ERF-1; ethylene-responsive transcription factor 1A; K09286 EREBP-like factor	http://www.genome.jp/dbget-bin/www_bget?ath:AT4G17500
evm.TU.scaffold734.10	M1	IAA7; auxin-responsive protein IAA7; K14484 auxin-responsive protein IAA	http://www.genome.jp/dbget-bin/www_bget?ath:AT3G23050
evm.TU.scaffold738.14	M1	GDH2; glutamate dehydrogenase 2; K00261 glutamate dehydrogenase (NAD(P)+) [EC:1.4.1.3]	http://www.genome.jp/dbget-bin/www_bget?ath:AT5G07440
evm.TU.scaffold738.15	M1	PPME1; pectinesterase PPME1; K01051 pectinesterase [EC:3.1.1.11]	http://www.genome.jp/dbget-bin/www_bget?ath:AT1G69940
evm.TU.scaffold739.16	M1	S-adenosyl-L-methionine-dependent methyltransferase-like protein	http://www.genome.jp/dbget-bin/www_bget?ath:AT5G54400
evm.TU.scaffold74.15	M1	PP2-B2; phloem protein 2-B2	http://www.genome.jp/dbget-bin/www_bget?ath:AT2G02250
evm.TU.scaffold74.173	M1	PIF4; transcription factor PIF4; K16189 phytochrome-interacting factor 4	http://www.genome.jp/dbget-bin/www_bget?ath:AT2G43010
evm.TU.scaffold74.174	M1	PIF4; transcription factor PIF4; K16189 phytochrome-interacting factor 4	http://www.genome.jp/dbget-bin/www_bget?ath:AT2G43010
evm.TU.scaffold74.18	M1	SNARE associated Golgi protein	http://www.genome.jp/dbget-bin/www_bget?ath:AT2G02370
evm.TU.scaffold74.8	M1	TOM3; tobamovirus multiplication protein 3	http://www.genome.jp/dbget-bin/www_bget?ath:AT2G02180
evm.TU.scaffold745.18	M1	AGL42; protein AGAMOUS-like 42	http://www.genome.jp/dbget-bin/www_bget?ath:AT5G62165
evm.TU.scaffold747.21	M1	pollen Ole e 1 allergen and extensin family protein	http://www.genome.jp/dbget-bin/www_bget?ath:AT4G17215
evm.TU.scaffold751.6	M1	oxidoreductase, 2OG-Fe(II) oxygenase family protein	http://www.genome.jp/dbget-bin/www_bget?ath:AT4G10490
evm.TU.scaffold758.12	M1	FIB; fibrillin	http://www.genome.jp/dbget-bin/www_bget?ath:AT4G04020
evm.TU.scaffold760.30	M1	bZIP1; basic leucine-zipper 1	http://www.genome.jp/dbget-bin/www_bget?ath:AT5G49450
evm.TU.scaffold763.5	M1	hypothetical protein	http://www.genome.jp/dbget-bin/www_bget?ath:AT4G04480
evm.TU.scaffold774.34	M1	VGT1; vacuolar glucose transporter 1	http://www.genome.jp/dbget-bin/www_bget?ath:AT3G03090
evm.TU.scaffold774.35	M1	VGT1; vacuolar glucose transporter 1	http://www.genome.jp/dbget-bin/www_bget?ath:AT3G03090
evm.TU.scaffold774.4	M1	calcium-dependent lipid-binding family protein	http://www.genome.jp/dbget-bin/www_bget?ath:AT3G04360
evm.TU.scaffold774.6	M1	RmlC-like cupins superfamily protein	http://www.genome.jp/dbget-bin/www_bget?ath:AT3G04300
evm.TU.scaffold777.6	M1	hypothetical protein	http://www.genome.jp/dbget-bin/www_bget?ath:AT1G03340
evm.TU.scaffold782.13	M1	ERF110; ethylene-responsive transcription factor ERF110	http://www.genome.jp/dbget-bin/www_bget?ath:AT5G50080
evm.TU.scaffold795.11	M1	TDT; tonoplast dicarboxylate transporter; K14445 solute carrier family 13 (sodium-dependent dicarboxylate transporter), member 2/3/5	http://www.genome.jp/dbget-bin/www_bget?ath:AT5G47560
evm.TU.scaffold8.162	M1	Regulator of Vps4 activity in the MVB pathway protein	http://www.genome.jp/dbget-bin/www_bget?ath:AT1G13340
evm.TU.scaffold8.187	M1	hypothetical protein	http://www.genome.jp/dbget-bin/www_bget?ath:AT1G12845
evm.TU.scaffold8.281	M1	G-type lectin S-receptor-like serine/threonine-protein kinase	http://www.genome.jp/dbget-bin/www_bget?ath:AT1G61360
evm.TU.scaffold8.73	M1	GOS11; golgi snare 11; K08495 golgi SNAP receptor complex member 1	http://www.genome.jp/dbget-bin/www_bget?ath:AT1G15880
evm.TU.scaffold801.4	M1	hypothetical protein	http://www.genome.jp/dbget-bin/www_bget?ath:AT5G55135
evm.TU.scaffold81.23	M1	CIPK13; CBL-interacting serine/threonine-protein kinase 13	http://www.genome.jp/dbget-bin/www_bget?ath:AT2G34180
evm.TU.scaffold81.55	M1	ethylene-responsive transcription factor ERF112	http://www.genome.jp/dbget-bin/www_bget?ath:AT2G33710
evm.TU.scaffold81.71	M1	NAC041; NAC domain containing protein 41	http://www.genome.jp/dbget-bin/www_bget?ath:AT2G33480
evm.TU.scaffold81.72	M1	GLTP1; glycolipid transfer protein 1	http://www.genome.jp/dbget-bin/www_bget?ath:AT2G33470
evm.TU.scaffold81.73	M1	RIC1; ROP-interactive CRIB motif-containing protein 1	http://www.genome.jp/dbget-bin/www_bget?ath:AT2G33460
evm.TU.scaffold82.2	M1	TED4; heme oxygenase 1; K00510 heme oxygenase [EC:1.14.99.3]	http://www.genome.jp/dbget-bin/www_bget?ath:AT2G26670
evm.TU.scaffold825.8	M1	AGL8; agamous-like MADS-box protein AGL8; K09264 MADS-box transcription factor, plant	http://www.genome.jp/dbget-bin/www_bget?ath:AT5G60910
evm.TU.scaffold827.14	M1	hypothetical protein	http://www.genome.jp/dbget-bin/www_bget?ath:AT3G55240
evm.TU.scaffold829.11	M1	PYL5; abscisic acid receptor PYL5; K14496 abscisic acid receptor PYR/PYL family	http://www.genome.jp/dbget-bin/www_bget?ath:AT5G05440
evm.TU.scaffold829.25	M1	ASA1; anthranilate synthase component I-1; K01657 anthranilate synthase component I [EC:4.1.3.27]	http://www.genome.jp/dbget-bin/www_bget?ath:AT5G05730
evm.TU.scaffold829.4	M1	Heavy metal transport/detoxification superfamily protein	http://www.genome.jp/dbget-bin/www_bget?ath:AT5G05365
evm.TU.scaffold831.15	M1	XTR8; xyloglucan endotransglucosylase/hydrolase; K08235 xyloglucan:xyloglucosyl transferase [EC:2.4.1.207]	http://www.genome.jp/dbget-bin/www_bget?ath:AT3G44990
evm.TU.scaffold834.12	M1	aspartyl protease-like protein	http://www.genome.jp/dbget-bin/www_bget?ath:AT2G42980
evm.TU.scaffold837.16	M1	APR2; 5'-adenylylsulfate reductase 2; K05907 adenylyl-sulfate reductase (glutathione) [EC:1.8.4.9]	http://www.genome.jp/dbget-bin/www_bget?ath:AT1G62180
evm.TU.scaffold840.10	M1	NRPB9A; DNA-directed RNA polymerases II, IV and V subunit 9A; K03017 DNA-directed RNA polymerase II subunit RPB9	http://www.genome.jp/dbget-bin/www_bget?ath:AT3G16980
evm.TU.scaffold840.5	M1	hypothetical protein	http://www.genome.jp/dbget-bin/www_bget?ath:AT5G13210
evm.TU.scaffold840.6	M1	hypothetical protein	http://www.genome.jp/dbget-bin/www_bget?ath:AT3G24780
evm.TU.scaffold841.25	M1	WRKY75; putative WRKY transcription factor 75	http://www.genome.jp/dbget-bin/www_bget?ath:AT5G13080
evm.TU.scaffold850.1	M1	tetratricopeptide repeat domain-containing protein	http://www.genome.jp/dbget-bin/www_bget?ath:AT5G20190
evm.TU.scaffold855.36	M1	FAD-binding Berberine family protein	http://www.genome.jp/dbget-bin/www_bget?ath:AT1G26390
evm.TU.scaffold856.11	M1	hypoxia-responsive family protein	http://www.genome.jp/dbget-bin/www_bget?ath:AT5G27760
evm.TU.scaffold857.42	M1	protein kinase family protein	http://www.genome.jp/dbget-bin/www_bget?ath:AT3G57740
evm.TU.scaffold857.43	M1	remorin-like protein	http://www.genome.jp/dbget-bin/www_bget?ath:AT2G41870
evm.TU.scaffold858.19	M1	IQD13; protein IQ-domain 13	http://www.genome.jp/dbget-bin/www_bget?ath:AT3G59690
evm.TU.scaffold867.27	M1	ZW9; protein ZW9	http://www.genome.jp/dbget-bin/www_bget?ath:AT1G58270
evm.TU.scaffold869.3	M1	lysophosphatidic acid acyltransferase	http://www.genome.jp/dbget-bin/www_bget?ath:AT4G24160
evm.TU.scaffold872.17	M1	--	--
evm.TU.scaffold872.2	M1	PCK2; phosphoenolpyruvate carboxykinase 2; K01610 phosphoenolpyruvate carboxykinase (ATP) [EC:4.1.1.49]	http://www.genome.jp/dbget-bin/www_bget?ath:AT5G65690
evm.TU.scaffold873.18	M1	PE11; pectinesterase 11; K01051 pectinesterase [EC:3.1.1.11]	http://www.genome.jp/dbget-bin/www_bget?ath:AT2G21610
evm.TU.scaffold881.3	M1	PR1; pathogenesis-related protein 1; K13449 pathogenesis-related protein 1	http://www.genome.jp/dbget-bin/www_bget?ath:AT2G14610
evm.TU.scaffold886.5	M1	NF-YB8; nuclear transcription factor Y subunit B-8	http://www.genome.jp/dbget-bin/www_bget?ath:AT2G37060
evm.TU.scaffold891.5	M1	hypothetical protein	http://www.genome.jp/dbget-bin/www_bget?ath:AT2G05910
evm.TU.scaffold896.14	M1	RNS3; ribonuclease 3; K01166 ribonuclease T2 [EC:3.1.27.1]	http://www.genome.jp/dbget-bin/www_bget?ath:AT1G26820
evm.TU.scaffold9.118	M1	BETA-TIP; beta-tonoplast intrinsic protein; K09873 aquaporin TIP	http://www.genome.jp/dbget-bin/www_bget?ath:AT1G17810
evm.TU.scaffold9.160	M1	hypothetical protein	http://www.genome.jp/dbget-bin/www_bget?ath:AT1G16950
evm.TU.scaffold9.67	M1	hypothetical protein	http://www.genome.jp/dbget-bin/www_bget?ath:AT1G19020
evm.TU.scaffold9.68	M1	hypothetical protein	http://www.genome.jp/dbget-bin/www_bget?ath:AT1G19020
evm.TU.scaffold9.75	M1	WRKY61; putative WRKY transcription factor 61	http://www.genome.jp/dbget-bin/www_bget?ath:AT1G18860
evm.TU.scaffold9.89	M1	60S ribosomal protein L6-3; K02934 large subunit ribosomal protein L6e	http://www.genome.jp/dbget-bin/www_bget?ath:AT1G74050
evm.TU.scaffold900.10	M1	HMA5; putative copper-transporting ATPase HMA5; K17686 Cu+-exporting ATPase [EC:3.6.3.54]	http://www.genome.jp/dbget-bin/www_bget?ath:AT1G63440
evm.TU.scaffold901.11	M1	HPL1; hydroperoxide lyase 1; K10528 hydroperoxide lyase [EC:4.1.2.-]	http://www.genome.jp/dbget-bin/www_bget?ath:AT4G15440
evm.TU.scaffold906.43	M1	bidirectional sugar transporter SWEET2; K15382 solute carrier family 50 (sugar transporter)	http://www.genome.jp/dbget-bin/www_bget?ath:AT3G14770
evm.TU.scaffold91.52	M1	LAC7; laccase 7; K05909 laccase [EC:1.10.3.2]	http://www.genome.jp/dbget-bin/www_bget?ath:AT3G09220
evm.TU.scaffold912.34	M1	histone H3.3; K11253 histone H3	http://www.genome.jp/dbget-bin/www_bget?ath:AT5G10980
evm.TU.scaffold919.5	M1	proline dehydrogenase 2; K00318 proline dehydrogenase [EC:1.5.-.-]	http://www.genome.jp/dbget-bin/www_bget?ath:AT5G38710
evm.TU.scaffold92.11	M1	FUT6; fucosyltransferase 6; K13681 xyloglucan fucosyltransferase [EC:2.4.1.-]	http://www.genome.jp/dbget-bin/www_bget?ath:AT1G14080
evm.TU.scaffold92.75	M1	stigma-specific stig1 family protein	http://www.genome.jp/dbget-bin/www_bget?ath:AT1G11925
evm.TU.scaffold93.70	M1	hypothetical protein	http://www.genome.jp/dbget-bin/www_bget?ath:AT4G24310
evm.TU.scaffold930.18	M1	MES9; methyl esterase 9; K08233 polyneuridine-aldehyde esterase [EC:3.1.1.78]	http://www.genome.jp/dbget-bin/www_bget?ath:AT4G37150
evm.TU.scaffold933.21	M1	putative membrane lipoprotein	http://www.genome.jp/dbget-bin/www_bget?ath:AT3G18250
evm.TU.scaffold936.2	M1	peroxidase 37; K00430 peroxidase [EC:1.11.1.7]	http://www.genome.jp/dbget-bin/www_bget?ath:AT4G08770
evm.TU.scaffold943.8	M1	OSM34; osmotin-like protein OSM34	http://www.genome.jp/dbget-bin/www_bget?ath:AT4G11650
evm.TU.scaffold947.30	M1	hypothetical protein	http://www.genome.jp/dbget-bin/www_bget?ath:AT2G44220
evm.TU.scaffold947.36	M1	bifunctional inhibitor/lipid-transfer protein/seed storage 2S albumin superfamily protein	http://www.genome.jp/dbget-bin/www_bget?ath:AT2G44300
evm.TU.scaffold952.23	M1	ATAF2; protein ATAF2	http://www.genome.jp/dbget-bin/www_bget?ath:AT5G08790
evm.TU.scaffold952.30	M1	DIC3; dicarboxylate carrier 3	http://www.genome.jp/dbget-bin/www_bget?ath:AT5G09470
evm.TU.scaffold952.32	M1	DIC3; dicarboxylate carrier 3	http://www.genome.jp/dbget-bin/www_bget?ath:AT5G09470
evm.TU.scaffold955.1	M1	ASN1; asparagine synthetase [glutamine-hydrolyzing]; K01953 asparagine synthase (glutamine-hydrolysing) [EC:6.3.5.4]	http://www.genome.jp/dbget-bin/www_bget?ath:AT3G47340
evm.TU.scaffold956.5	M1	ribulose bisphosphate carboxylase small chain 1B; K01602 ribulose-bisphosphate carboxylase small chain [EC:4.1.1.39]	http://www.genome.jp/dbget-bin/www_bget?ath:AT5G38430
evm.TU.scaffold962.4	M1	CBL9; calcineurin B-like protein 9; K06268 serine/threonine-protein phosphatase 2B regulatory subunit	http://www.genome.jp/dbget-bin/www_bget?ath:AT5G47100
evm.TU.scaffold968.44	M1	SHP1; agamous-like MADS-box protein AGL1; K09264 MADS-box transcription factor, plant	http://www.genome.jp/dbget-bin/www_bget?ath:AT3G58780
evm.TU.scaffold976.10	M1	HAT1; homeobox-leucine zipper protein HAT1; K09338 homeobox-leucine zipper protein	http://www.genome.jp/dbget-bin/www_bget?ath:AT4G17460
evm.TU.scaffold978.1	M1	RLK; receptor lectin kinase	http://www.genome.jp/dbget-bin/www_bget?ath:AT2G37710
evm.TU.scaffold978.4	M1	hypothetical protein	http://www.genome.jp/dbget-bin/www_bget?ath:AT2G37750
evm.TU.scaffold98.21	M1	CIII heat shock protein 17.4; K13993 HSP20 family protein	http://www.genome.jp/dbget-bin/www_bget?ath:AT1G54050
evm.TU.scaffold98.25	M1	GLIP3; GDSL motif lipase 3	http://www.genome.jp/dbget-bin/www_bget?ath:AT1G53990
evm.TU.scaffold98.26	M1	GLIP5; GDSL esterase/lipase 5	http://www.genome.jp/dbget-bin/www_bget?ath:AT1G53920
evm.TU.scaffold993.19	M1	40S ribosomal protein S20-2; K02969 small subunit ribosomal protein S20e	http://www.genome.jp/dbget-bin/www_bget?ath:AT3G47370
novel.1005	M1	GDSL esterase/lipase	http://www.genome.jp/dbget-bin/www_bget?ath:AT1G33811
novel.1281	M1	CSDP1; cold shock protein 1; K09250 cellular nucleic acid-binding protein	http://www.genome.jp/dbget-bin/www_bget?ath:AT4G36020
novel.1537	M1	polynucleotidyl transferase, ribonuclease H-like protein	http://www.genome.jp/dbget-bin/www_bget?ath:AT1G74390
novel.1608	M1	--	--
novel.1654	M1	--	--
novel.1979	M1	--	--
novel.2082	M1	--	--
novel.2105	M1	--	--
novel.2212	M1	hypothetical protein	http://www.genome.jp/dbget-bin/www_bget?ath:AT1G55205
novel.2423	M1	putative F-box/FBD/LRR-repeat protein	http://www.genome.jp/dbget-bin/www_bget?ath:AT4G00320
novel.280	M1	--	--
novel.282	M1	AAA-type ATPase domain-containing protein	http://www.genome.jp/dbget-bin/www_bget?ath:AT3G19740
novel.3100	M1	PF00232:Glycosyl hydrolase family 1
novel.3340	M1	--
novel.344	M1	hypothetical protein	http://www.genome.jp/dbget-bin/www_bget?ath:AT5G41980
novel.3515	M1	--
novel.3654	M1	--
novel.3687	M1	PF00195:Chalcone and stilbene synthases, N-terminal domain
novel.3710	M1	--
novel.3970	M1	--
novel.633	M1	--	--
novel.634	M1	--	--
novel.638	M1	putative protein phosphatase 2C 79	http://www.genome.jp/dbget-bin/www_bget?ath:AT5G66080
novel.75	M1	CRK41; cysteine-rich receptor-like protein kinase 41	http://www.genome.jp/dbget-bin/www_bget?ath:AT4G00970
novel.835	M1	SBP (S-ribonuclease binding protein) family protein; K19042 E3 ubiquitin-protein ligase BOI and related proteins [EC:6.3.2.19]	http://www.genome.jp/dbget-bin/www_bget?ath:AT4G35070
novel.880	M1	aspartyl protease-like protein	http://www.genome.jp/dbget-bin/www_bget?ath:AT1G03220
evm.TU.scaffold1051.5	M10	nodulin MtN21-like transporter family protein	http://www.genome.jp/dbget-bin/www_bget?ath:AT2G39510
evm.TU.scaffold106.74	M10	CYP72A15; cytochrome P450, family 72, subfamily A, polypeptide 15	http://www.genome.jp/dbget-bin/www_bget?ath:AT3G14690
evm.TU.scaffold1060.10	M10	hypothetical protein	http://www.genome.jp/dbget-bin/www_bget?ath:AT3G03170
evm.TU.scaffold107.2	M10	PGL2; 6-phosphogluconolactonase 2; K01057 6-phosphogluconolactonase [EC:3.1.1.31]	http://www.genome.jp/dbget-bin/www_bget?ath:AT3G49360
evm.TU.scaffold107.20	M10	signal recognition particle subunit SRP9; K03109 signal recognition particle subunit SRP9	http://www.genome.jp/dbget-bin/www_bget?ath:AT3G49100
evm.TU.scaffold107.3	M10	PGL2; 6-phosphogluconolactonase 2; K01057 6-phosphogluconolactonase [EC:3.1.1.31]	http://www.genome.jp/dbget-bin/www_bget?ath:AT3G49360
evm.TU.scaffold107.47	M10	CXE12; probable carboxylesterase 12	http://www.genome.jp/dbget-bin/www_bget?ath:AT3G48690
evm.TU.scaffold11.183	M10	GH3.17; indole-3-acetic acid-amido synthetase GH3.17; K14487 auxin responsive GH3 gene family	http://www.genome.jp/dbget-bin/www_bget?ath:AT1G28130
evm.TU.scaffold118.21	M10	RING/U-box superfamily protein	http://www.genome.jp/dbget-bin/www_bget?ath:AT5G01960
evm.TU.scaffold123.56	M10	--	--
evm.TU.scaffold1245.3	M10	hypothetical protein	http://www.genome.jp/dbget-bin/www_bget?ath:AT1G05340
evm.TU.scaffold1252.17	M10	2-oxoglutarate-dependent dioxygenase-like protein	http://www.genome.jp/dbget-bin/www_bget?ath:AT1G06620
evm.TU.scaffold1252.24	M10	hypothetical protein	http://www.genome.jp/dbget-bin/www_bget?ath:AT1G06050
evm.TU.scaffold1261.11	M10	NBS1; nijmegen breakage syndrome 1 protein; K10867 nijmegen breakage syndrome protein 1	http://www.genome.jp/dbget-bin/www_bget?ath:AT3G02680
evm.TU.scaffold1261.19	M10	hypothetical protein	http://www.genome.jp/dbget-bin/www_bget?ath:AT3G02790
evm.TU.scaffold1265.26	M10	hypothetical protein	http://www.genome.jp/dbget-bin/www_bget?ath:AT2G46200
evm.TU.scaffold1329.13	M10	ABIL1; protein ABIL1	http://www.genome.jp/dbget-bin/www_bget?ath:AT2G46225
evm.TU.scaffold1352.7	M10	acid phosphatase class IIIB protein	http://www.genome.jp/dbget-bin/www_bget?ath:AT2G39920
evm.TU.scaffold1373.1	M10	hypothetical protein	http://www.genome.jp/dbget-bin/www_bget?ath:AT2G38640
evm.TU.scaffold1373.10	M10	calmodulin-binding protein-like protein	http://www.genome.jp/dbget-bin/www_bget?ath:AT2G38800
evm.TU.scaffold1373.22	M10	Rossmann-fold NAD(P)-binding domain-containing protein	http://www.genome.jp/dbget-bin/www_bget?ath:AT2G39080
evm.TU.scaffold1373.23	M10	Rossmann-fold NAD(P)-binding domain-containing protein	http://www.genome.jp/dbget-bin/www_bget?ath:AT2G39080
evm.TU.scaffold1373.6	M10	sodium/pyruvate cotransporter BASS2; K03453 bile acid:Na+ symporter, BASS family	http://www.genome.jp/dbget-bin/www_bget?ath:AT2G26900
evm.TU.scaffold1437.2	M10	aldolase-type TIM barrel family protein; K05539 tRNA-dihydrouridine synthase A [EC:1.-.-.-]	http://www.genome.jp/dbget-bin/www_bget?ath:AT5G47970
evm.TU.scaffold1437.23	M10	RPS13A; 40S ribosomal protein S13-2; K02953 small subunit ribosomal protein S13e	http://www.genome.jp/dbget-bin/www_bget?ath:AT4G00100
evm.TU.scaffold1437.33	M10	ZPR1; little zipper 1 protein	http://www.genome.jp/dbget-bin/www_bget?ath:AT2G45450
evm.TU.scaffold1437.35	M10	FLA8; FASCICLIN-like arabinogalactan protein 8	http://www.genome.jp/dbget-bin/www_bget?ath:AT2G45470
evm.TU.scaffold1437.5	M10	alpha/beta-Hydrolases superfamily protein	http://www.genome.jp/dbget-bin/www_bget?ath:AT2G44970
evm.TU.scaffold147.71	M10	hypothetical protein	http://www.genome.jp/dbget-bin/www_bget?ath:AT2G47200
evm.TU.scaffold147.84	M10	peptide chain release factor 1; K02835 peptide chain release factor 1	http://www.genome.jp/dbget-bin/www_bget?ath:AT2G47020
evm.TU.scaffold1488.19	M10	S-adenosyl-L-methionine-dependent methyltransferase domain-containing protein	http://www.genome.jp/dbget-bin/www_bget?ath:AT1G16445
evm.TU.scaffold1525.1	M10	--	--
evm.TU.scaffold1525.5	M10	SPFH/Band 7/PHB domain-containing membrane-associated protein	http://www.genome.jp/dbget-bin/www_bget?ath:AT3G01290
evm.TU.scaffold159.123	M10	Cox19-like CHCH family protein	http://www.genome.jp/dbget-bin/www_bget?ath:AT5G09570
evm.TU.scaffold1715.1	M10	FPA; Flowering time control protein FPA	http://www.genome.jp/dbget-bin/www_bget?ath:AT2G43410
evm.TU.scaffold1715.2	M10	3beta-hydroxysteroid-dehydrogenase/decarboxylase isoform 3; K07748 sterol-4alpha-carboxylate 3-dehydrogenase (decarboxylating) [EC:1.1.1.170]	http://www.genome.jp/dbget-bin/www_bget?ath:AT2G43420
evm.TU.scaffold1761.17	M10	hypothetical protein	http://www.genome.jp/dbget-bin/www_bget?ath:AT2G38465
evm.TU.scaffold1761.18_evm.TU.scaffold1761.19	M10	WRKY33; putative WRKY transcription factor 33; K13424 WRKY transcription factor 33	http://www.genome.jp/dbget-bin/www_bget?ath:AT2G38470
evm.TU.scaffold1795.12	M10	putative NADH dehydrogenase [ubiquinone] 1 alpha subcomplex subunit 12; K11352 NADH dehydrogenase (ubiquinone) 1 alpha subcomplex subunit 12	http://www.genome.jp/dbget-bin/www_bget?ath:AT3G03100
evm.TU.scaffold1795.7	M10	--	--
evm.TU.scaffold190.79	M10	MYB13; myb domain protein 13; K09422 myb proto-oncogene protein, plant	http://www.genome.jp/dbget-bin/www_bget?ath:AT1G06180
evm.TU.scaffold2025.13	M10	hypothetical protein	http://www.genome.jp/dbget-bin/www_bget?ath:AT2G44010
evm.TU.scaffold2025.18	M10	GDI2; RAB GDP dissociation inhibitor 2; K17255 Rab GDP dissociation inhibitor	http://www.genome.jp/dbget-bin/www_bget?ath:AT3G59920
evm.TU.scaffold2025.19	M10	60S ribosomal protein L7-3; K02937 large subunit ribosomal protein L7e	http://www.genome.jp/dbget-bin/www_bget?ath:AT2G44120
evm.TU.scaffold2025.21	M10	cysteine protease ATG4a; K08342 cysteine protease ATG4 [EC:3.4.22.-]	http://www.genome.jp/dbget-bin/www_bget?ath:AT2G44140
evm.TU.scaffold2025.22	M10	ASHH3; histone-lysine N-methyltransferase ASHH3; K11423 histone-lysine N-methyltransferase SETD2 [EC:2.1.1.43]	http://www.genome.jp/dbget-bin/www_bget?ath:AT2G44150
evm.TU.scaffold2025.8	M10	hypothetical protein	http://www.genome.jp/dbget-bin/www_bget?ath:AT2G43945
evm.TU.scaffold204.2	M10	hypothetical protein	http://www.genome.jp/dbget-bin/www_bget?ath:AT2G04900
evm.TU.scaffold2045.10	M10	FAB1; 3-oxoacyl-[acyl-carrier-protein] synthase II; K09458 3-oxoacyl-[acyl-carrier-protein] synthase II [EC:2.3.1.179]	http://www.genome.jp/dbget-bin/www_bget?ath:AT1G74960
evm.TU.scaffold2045.3	M10	EDS16; Isochorismate synthase 1; K02552 menaquinone-specific isochorismate synthase [EC:5.4.4.2]	http://www.genome.jp/dbget-bin/www_bget?ath:AT1G74710
evm.TU.scaffold2056.3	M10	PSRP4; plastid-specific ribosomal protein 4; K19033 RPS31; 30S ribosomal protein S31	http://www.genome.jp/dbget-bin/www_bget?ath:AT2G38140
evm.TU.scaffold21.10	M10	Actin cross-linking protein	http://www.genome.jp/dbget-bin/www_bget?ath:AT1G27100
evm.TU.scaffold21.100	M10	hypothetical protein	http://www.genome.jp/dbget-bin/www_bget?ath:AT1G24600
evm.TU.scaffold21.102	M10	hypothetical protein	http://www.genome.jp/dbget-bin/www_bget?ath:AT1G24577
evm.TU.scaffold21.103	M10	hypothetical protein	http://www.genome.jp/dbget-bin/www_bget?ath:AT1G24575
evm.TU.scaffold21.104	M10	RING/U-box domain-containing protein; K16285 RING/U-box domain-containing protein	http://www.genome.jp/dbget-bin/www_bget?ath:AT1G67856
evm.TU.scaffold21.105	M10	hypothetical protein	http://www.genome.jp/dbget-bin/www_bget?ath:AT1G24560
evm.TU.scaffold21.106	M10	hypothetical protein	http://www.genome.jp/dbget-bin/www_bget?ath:AT1G24560
evm.TU.scaffold21.118	M10	G6PD3; glucose-6-phosphate dehydrogenase 3; K00036 glucose-6-phosphate 1-dehydrogenase [EC:1.1.1.49]	http://www.genome.jp/dbget-bin/www_bget?ath:AT1G24280
evm.TU.scaffold21.120	M10	hypothetical protein	http://www.genome.jp/dbget-bin/www_bget?ath:AT5G13090
evm.TU.scaffold21.97	M10	putative calcium-binding protein CML25; K13448 calcium-binding protein CML	http://www.genome.jp/dbget-bin/www_bget?ath:AT1G24620
evm.TU.scaffold2121.10	M10	ANL2; homeobox-leucine zipper protein ANTHOCYANINLESS 2	http://www.genome.jp/dbget-bin/www_bget?ath:AT4G00730
evm.TU.scaffold213.58	M10	CYP71A23; cytochrome P450 71A23	http://www.genome.jp/dbget-bin/www_bget?ath:AT3G48300
evm.TU.scaffold2316.1	M10	BGLU15; beta glucosidase 15; K01188 beta-glucosidase [EC:3.2.1.21]	http://www.genome.jp/dbget-bin/www_bget?ath:AT2G44450
evm.TU.scaffold2316.4	M10	BGLU27; beta glucosidase 27; K01188 beta-glucosidase [EC:3.2.1.21]	http://www.genome.jp/dbget-bin/www_bget?ath:AT3G60120
evm.TU.scaffold2332.7	M10	hypothetical protein	http://www.genome.jp/dbget-bin/www_bget?ath:AT4G29735
evm.TU.scaffold2367.5	M10	BGLU27; beta glucosidase 27; K01188 beta-glucosidase [EC:3.2.1.21]	http://www.genome.jp/dbget-bin/www_bget?ath:AT3G60120
evm.TU.scaffold2440.3	M10	TPP; thylakoid processing peptide; K03100 signal peptidase I [EC:3.4.21.89]	http://www.genome.jp/dbget-bin/www_bget?ath:AT2G30440
evm.TU.scaffold2465.7	M10	GPS1; geranyl diphosphate synthase 1; K14066 geranyl diphosphate synthase [EC:2.5.1.1]	http://www.genome.jp/dbget-bin/www_bget?ath:AT2G34630
evm.TU.scaffold25.109	M10	NAC005; NAC domain-containing protein 5	http://www.genome.jp/dbget-bin/www_bget?ath:AT1G02250
evm.TU.scaffold25.25	M10	metallo-beta-lactamase domain-containing protein	http://www.genome.jp/dbget-bin/www_bget?ath:AT1G29700
evm.TU.scaffold25.62	M10	50S ribosomal protein L34; K02914 large subunit ribosomal protein L34	http://www.genome.jp/dbget-bin/www_bget?ath:AT1G29070
evm.TU.scaffold252.8	M10	Nucleic acid-binding, OB-fold-like protein	http://www.genome.jp/dbget-bin/www_bget?ath:AT1G14800
evm.TU.scaffold2522.12	M10	NAD(P)-binding Rossmann-fold-containing protein	http://www.genome.jp/dbget-bin/www_bget?ath:AT2G37660
evm.TU.scaffold2555.2	M10	CAX1; vacuolar cation/proton exchanger 1; K07300 Ca2+:H+ antiporter	http://www.genome.jp/dbget-bin/www_bget?ath:AT2G38170
evm.TU.scaffold2568.12	M10	hypothetical protein	http://www.genome.jp/dbget-bin/www_bget?ath:AT2G43340
evm.TU.scaffold26.97	M10	hypothetical protein	http://www.genome.jp/dbget-bin/www_bget?ath:AT3G05937
evm.TU.scaffold26.99	M10	heavy-metal-associated domain-containing protein	http://www.genome.jp/dbget-bin/www_bget?ath:AT3G05920
evm.TU.scaffold2715.10	M10	UDP-glycosyltransferase 86A1	http://www.genome.jp/dbget-bin/www_bget?ath:AT2G36970
evm.TU.scaffold2715.6	M10	C2H2-type zinc finger-containing protein; K14821 bud site selection protein 20	http://www.genome.jp/dbget-bin/www_bget?ath:AT2G36930
evm.TU.scaffold2715.9	M10	UDP-glycosyltransferase 86A1	http://www.genome.jp/dbget-bin/www_bget?ath:AT2G36970
evm.TU.scaffold2841.13	M10	hypothetical protein	http://www.genome.jp/dbget-bin/www_bget?ath:AT2G42190
evm.TU.scaffold2841.15	M10	PGL34; plastoglobulin 34kD	http://www.genome.jp/dbget-bin/www_bget?ath:AT3G58010
evm.TU.scaffold2841.4	M10	emb2184; 50S ribosomal protein L31; K02909 large subunit ribosomal protein L31	http://www.genome.jp/dbget-bin/www_bget?ath:AT1G75350
evm.TU.scaffold2841.7	M10	hypothetical protein	http://www.genome.jp/dbget-bin/www_bget?ath:AT2G42310
evm.TU.scaffold2841.9	M10	transcription factor bHLH130	http://www.genome.jp/dbget-bin/www_bget?ath:AT2G42280
evm.TU.scaffold3113.5	M10	phosphatidylinositol N-acetylglucosaminyltransferase, GPI19/PIG-P subunit; K03861 phosphatidylinositol glycan, class P	http://www.genome.jp/dbget-bin/www_bget?ath:AT2G39445
evm.TU.scaffold3113.7	M10	RPL23AA; 60S ribosomal protein L23a-1; K02893 large subunit ribosomal protein L23Ae	http://www.genome.jp/dbget-bin/www_bget?ath:AT2G39460
evm.TU.scaffold3113.8	M10	PPL2; PsbP-like protein 2	http://www.genome.jp/dbget-bin/www_bget?ath:AT2G39470
evm.TU.scaffold326.13	M10	WRKY18; WRKY DNA-binding protein 18	http://www.genome.jp/dbget-bin/www_bget?ath:AT4G31800
evm.TU.scaffold3477.2	M10	PDR5; ABC transporter G family member 33	http://www.genome.jp/dbget-bin/www_bget?ath:AT2G37280
evm.TU.scaffold3576.1	M10	NAD(P)-binding Rossmann-fold-containing protein	http://www.genome.jp/dbget-bin/www_bget?ath:AT2G37660
evm.TU.scaffold3576.3	M10	FHY1; far-red elongated hypocotyl 1 protein	http://www.genome.jp/dbget-bin/www_bget?ath:AT2G37678
evm.TU.scaffold3576.5	M10	RLK; receptor lectin kinase	http://www.genome.jp/dbget-bin/www_bget?ath:AT2G37710
evm.TU.scaffold4054.3	M10	BIK1; serine/threonine-protein kinase BIK1	http://www.genome.jp/dbget-bin/www_bget?ath:AT2G39660
evm.TU.scaffold4163.1	M10	MAT3; S-adenosylmethionine synthase 3; K00789 S-adenosylmethionine synthetase [EC:2.5.1.6]	http://www.genome.jp/dbget-bin/www_bget?ath:AT2G36880
evm.TU.scaffold42.43	M10	MES18; methyl esterase 18	http://www.genome.jp/dbget-bin/www_bget?ath:AT5G58310
evm.TU.scaffold4363.2	M10	--	--
evm.TU.scaffold4429.1	M10	RTFL8; protein rotundifolia like 8	http://www.genome.jp/dbget-bin/www_bget?ath:AT2G39705
evm.TU.scaffold477.3	M10	PAP22; purple acid phosphatase 22	http://www.genome.jp/dbget-bin/www_bget?ath:AT3G52820
evm.TU.scaffold482.15	M10	--	--
evm.TU.scaffold51.81	M10	F-box and associated interaction domains-containing protein	http://www.genome.jp/dbget-bin/www_bget?ath:AT1G09650
evm.TU.scaffold56.110	M10	[fructose-bisphosphate aldolase]-lysine N-methyltransferase; K00592 [ribulose-bisphosphate carboxylase]-lysine N-methyltransferase [EC:2.1.1.127]	http://www.genome.jp/dbget-bin/www_bget?ath:AT1G14030
evm.TU.scaffold56.114	M10	GCK domain-containing protein	http://www.genome.jp/dbget-bin/www_bget?ath:AT1G14060
evm.TU.scaffold56.142	M10	NADH dehydrogenase (ubiquinone)	http://www.genome.jp/dbget-bin/www_bget?ath:AT1G14450
evm.TU.scaffold56.171	M10	Sec14p-like phosphatidylinositol transfer family protein	http://www.genome.jp/dbget-bin/www_bget?ath:AT1G14820
evm.TU.scaffold56.175	M10	NUDT18; nudix hydrolase 18	http://www.genome.jp/dbget-bin/www_bget?ath:AT1G14860
evm.TU.scaffold56.178	M10	PCR1; cadmium resistance protein 1	http://www.genome.jp/dbget-bin/www_bget?ath:AT1G14880
evm.TU.scaffold56.18_evm.TU.scaffold56.22	M10	CPN10; chaperonin 10; K04078 chaperonin GroES	http://www.genome.jp/dbget-bin/www_bget?ath:AT1G14980
evm.TU.scaffold56.182	M10	pentatricopeptide repeat-containing protein	http://www.genome.jp/dbget-bin/www_bget?ath:AT1G12300
evm.TU.scaffold56.202	M10	hypothetical protein	http://www.genome.jp/dbget-bin/www_bget?ath:AT1G15350
evm.TU.scaffold56.23	M10	A20/AN1-like zinc finger family protein	http://www.genome.jp/dbget-bin/www_bget?ath:AT1G12440
evm.TU.scaffold56.3	M10	polynucleotidyl transferase, ribonuclease H-like superfamily protein; K07447 putative holliday junction resolvase [EC:3.1.-.-]	http://www.genome.jp/dbget-bin/www_bget?ath:AT1G12244
evm.TU.scaffold56.4	M10	Pentapeptide repeat-containing protein	http://www.genome.jp/dbget-bin/www_bget?ath:AT1G12250
evm.TU.scaffold56.48	M10	hypothetical protein	http://www.genome.jp/dbget-bin/www_bget?ath:AT1G12830
evm.TU.scaffold56.63	M10	CYP71B2; cytochrome P450 71B2	http://www.genome.jp/dbget-bin/www_bget?ath:AT1G13080
evm.TU.scaffold56.79	M10	GAPC1; glyceraldehyde-3-phosphate dehydrogenase C subunit 1; K00134 glyceraldehyde 3-phosphate dehydrogenase [EC:1.2.1.12]	http://www.genome.jp/dbget-bin/www_bget?ath:AT3G04120
evm.TU.scaffold56.81	M10	hypothetical protein	http://www.genome.jp/dbget-bin/www_bget?ath:AT1G13470
evm.TU.scaffold56.98	M10	SGS3-like protein FDM4	http://www.genome.jp/dbget-bin/www_bget?ath:AT1G13790
evm.TU.scaffold577.16	M10	hypothetical protein	http://www.genome.jp/dbget-bin/www_bget?ath:AT3G13950
evm.TU.scaffold60.44	M10	PMEPCRA; methylesterase PCR A; K01051 pectinesterase [EC:3.1.1.11]	http://www.genome.jp/dbget-bin/www_bget?ath:AT1G11580
evm.TU.scaffold60.59	M10	BFN1; endonuclease 1	http://www.genome.jp/dbget-bin/www_bget?ath:AT1G11190
evm.TU.scaffold60.8	M10	hypothetical protein	http://www.genome.jp/dbget-bin/www_bget?ath:AT1G12150
evm.TU.scaffold633.13	M10	--	--
evm.TU.scaffold693.23	M10	ELMO/CED-12 family protein	http://www.genome.jp/dbget-bin/www_bget?ath:AT3G03610
evm.TU.scaffold693.40	M10	--	--
evm.TU.scaffold693.7	M10	RNA-binding ASCH domain protein	http://www.genome.jp/dbget-bin/www_bget?ath:AT3G03320
evm.TU.scaffold726.15	M10	histone H4; K11254 histone H4	http://www.genome.jp/dbget-bin/www_bget?ath:AT3G53730
evm.TU.scaffold726.27	M10	histone H4; K11254 histone H4	http://www.genome.jp/dbget-bin/www_bget?ath:AT3G53730
evm.TU.scaffold737.12	M10	HCF153; high chlorophyll fluorescence 153 protein	http://www.genome.jp/dbget-bin/www_bget?ath:AT4G31560
evm.TU.scaffold737.23	M10	FLP1; flowering-promoting factor 1-like protein 1	http://www.genome.jp/dbget-bin/www_bget?ath:AT4G31380
evm.TU.scaffold737.29	M10	AIG2-like protein	http://www.genome.jp/dbget-bin/www_bget?ath:AT4G31310
evm.TU.scaffold8.117	M10	TWN2; Valyl-tRNA synthetase; K01873 valyl-tRNA synthetase [EC:6.1.1.9]	http://www.genome.jp/dbget-bin/www_bget?ath:AT1G14610
evm.TU.scaffold834.29	M10	CSY3; citrate synthase 3; K01647 citrate synthase [EC:2.3.3.1]	http://www.genome.jp/dbget-bin/www_bget?ath:AT2G42790
evm.TU.scaffold834.30	M10	DNAJ heat shock N-terminal domain-containing protein	http://www.genome.jp/dbget-bin/www_bget?ath:AT2G42750
evm.TU.scaffold911.12	M10	sugar transporter ERD6-like 12	http://www.genome.jp/dbget-bin/www_bget?ath:AT3G05400
evm.TU.scaffold960.21	M10	Signal peptidase complex subunit 3B; K12948 signal peptidase complex subunit 3 [EC:3.4.-.-]	http://www.genome.jp/dbget-bin/www_bget?ath:AT5G27430
evm.TU.scaffold960.23	M10	ERCC1; DNA excision repair protein ERCC-1; K10849 DNA excision repair protein ERCC-1	http://www.genome.jp/dbget-bin/www_bget?ath:AT3G05210
evm.TU.scaffold978.6	M10	aldo-keto reductase family 4 member C9	http://www.genome.jp/dbget-bin/www_bget?ath:AT2G37770
evm.TU.scaffold994.19	M10	RHC1A; RING-H2 finger C1A; K11982 E3 ubiquitin-protein ligase RNF115/126 [EC:6.3.2.19]	http://www.genome.jp/dbget-bin/www_bget?ath:AT2G40830
evm.TU.scaffold994.48	M10	hypothetical protein	http://www.genome.jp/dbget-bin/www_bget?ath:AT2G04900
evm.TU.scaffold994.49	M10	F-box and associated interaction domains-containing protein	http://www.genome.jp/dbget-bin/www_bget?ath:AT1G09650
evm.TU.scaffold994.6	M10	EXPA8; expansin A8	http://www.genome.jp/dbget-bin/www_bget?ath:AT2G40610
novel.133	M10	RPP8; disease resistance protein RPP8	http://www.genome.jp/dbget-bin/www_bget?ath:AT5G43470
novel.188	M10	--
novel.2231	M10	F-box/RNI-like/FBD-like domains-containing protein	http://www.genome.jp/dbget-bin/www_bget?ath:AT1G16930
novel.2235	M10	Bifunctional inhibitor/lipid-transfer protein/seed storage 2S albumin superfamily protein	http://www.genome.jp/dbget-bin/www_bget?ath:AT1G18280
novel.2472	M10	transcription factor bHLH87	http://www.genome.jp/dbget-bin/www_bget?ath:AT3G21330
novel.2867	M10	--
novel.3106	M10	--
novel.3226	M10	--
novel.3549	M10	--
novel.3840	M10	--
evm.TU.scaffold120.39	M11	hypothetical protein	http://www.genome.jp/dbget-bin/www_bget?ath:AT5G59080
evm.TU.scaffold120.54	M11	--	--
evm.TU.scaffold120.72	M11	GIL1; protein GRAVITROPIC IN THE LIGHT	http://www.genome.jp/dbget-bin/www_bget?ath:AT5G58960
evm.TU.scaffold1256.13	M11	--	--
evm.TU.scaffold1278.46	M11	AtIPCS1; phosphatidylinositol:ceramide inositolphosphotransferase 1	http://www.genome.jp/dbget-bin/www_bget?ath:AT3G54020
evm.TU.scaffold128.41	M11	60S ribosomal protein L21-1; K02889 large subunit ribosomal protein L21e	http://www.genome.jp/dbget-bin/www_bget?ath:AT1G09690
evm.TU.scaffold128.63	M11	--	--
evm.TU.scaffold128.81	M11	chaperone DnaJ-domain-containing protein	http://www.genome.jp/dbget-bin/www_bget?ath:AT1G77930
evm.TU.scaffold130.8	M11	--	--
evm.TU.scaffold1330.1	M11	PDR6; ABC transporter G family member 34	http://www.genome.jp/dbget-bin/www_bget?ath:AT2G36380
evm.TU.scaffold1330.2	M11	IWS1; IWS1-like protein; K17498 transcription factor SPN1	http://www.genome.jp/dbget-bin/www_bget?ath:AT1G32130
evm.TU.scaffold1378.10	M11	ARID/BRIGHT AND ELM2 DNA-binding domain-containing protein	http://www.genome.jp/dbget-bin/www_bget?ath:AT2G46040
evm.TU.scaffold1378.11	M11	MEE31; mannose-6-phosphate isomerase; K01809 mannose-6-phosphate isomerase [EC:5.3.1.8]	http://www.genome.jp/dbget-bin/www_bget?ath:AT3G02570
evm.TU.scaffold138.17	M11	haloacid dehalogenase-like hydrolase family protein	http://www.genome.jp/dbget-bin/www_bget?ath:AT2G25870
evm.TU.scaffold139.55	M11	UGT84A3; UDP-glycosyltransferase 84A3	http://www.genome.jp/dbget-bin/www_bget?ath:AT4G15490
evm.TU.scaffold1466.8	M11	--	--
evm.TU.scaffold1466.9	M11	GLY3; persulfide dioxygenase ETHE1-like protein; K17725 sulfur dioxygenase [EC:1.13.11.18]	http://www.genome.jp/dbget-bin/www_bget?ath:AT1G53580
evm.TU.scaffold1467.6	M11	hypothetical protein	http://www.genome.jp/dbget-bin/www_bget?ath:AT4G15620
evm.TU.scaffold1505.1	M11	WRKY70; WRKY transcription factor 70	http://www.genome.jp/dbget-bin/www_bget?ath:AT3G56400
evm.TU.scaffold1586.1	M11	EXO70A2; exocyst subunit exo70-A2; K07195 exocyst complex component 7	http://www.genome.jp/dbget-bin/www_bget?ath:AT5G52340
evm.TU.scaffold1670.2	M11	CBS and DUF21 domain-containing protein; K16302 metal transporter CNNM	http://www.genome.jp/dbget-bin/www_bget?ath:AT4G14240
evm.TU.scaffold1675.2	M11	40S ribosomal protein S25-1; K02975 small subunit ribosomal protein S25e	http://www.genome.jp/dbget-bin/www_bget?ath:AT2G16360
evm.TU.scaffold170.16	M11	CAB1; chlorophyll A/B binding protein 1; K08912 light-harvesting complex II chlorophyll a/b binding protein 1	http://www.genome.jp/dbget-bin/www_bget?ath:AT1G29930
evm.TU.scaffold1731.8	M11	--	--
evm.TU.scaffold1759.3	M11	NTRA; NADPH-dependent thioredoxin reductase A; K00384 thioredoxin reductase (NADPH) [EC:1.8.1.9]	http://www.genome.jp/dbget-bin/www_bget?ath:AT2G17420
evm.TU.scaffold1760.4	M11	Helicase protein with RING/U-box domain; K15505 DNA repair protein RAD5 [EC:3.6.4.-]	http://www.genome.jp/dbget-bin/www_bget?ath:AT5G43530
evm.TU.scaffold1910.4	M11	MLP31; MLP-like protein 31	http://www.genome.jp/dbget-bin/www_bget?ath:AT1G70840
evm.TU.scaffold1948.6	M11	RABB1C; RAB GTPase homolog B1C; K07877 Ras-related protein Rab-2A	http://www.genome.jp/dbget-bin/www_bget?ath:AT4G17170
evm.TU.scaffold2.133	M11	cytochrome c oxidase subunit 6a; K02266 cytochrome c oxidase subunit 6a	http://www.genome.jp/dbget-bin/www_bget?ath:AT4G37830
evm.TU.scaffold2.139	M11	ANT; AP2-like ethylene-responsive transcription factor ANT; K09285 AP2-like factor, ANT lineage	http://www.genome.jp/dbget-bin/www_bget?ath:AT4G37750
evm.TU.scaffold2.165	M11	BRU6; indole-3-acetic acid-amido synthetase GH3.2; K14487 auxin responsive GH3 gene family	http://www.genome.jp/dbget-bin/www_bget?ath:AT4G37390
evm.TU.scaffold2.174	M11	SEP4; protein SEPALLATA 4	http://www.genome.jp/dbget-bin/www_bget?ath:AT2G03710
evm.TU.scaffold2.175	M11	VGT1; vacuolar glucose transporter 1	http://www.genome.jp/dbget-bin/www_bget?ath:AT3G03090
evm.TU.scaffold2.269	M11	S-adenosyl-L-methionine-dependent methyltransferase domain-containing protein; K18826 calmodulin-lysine N-methyltransferase [EC:2.1.1.60]	http://www.genome.jp/dbget-bin/www_bget?ath:AT4G35987
evm.TU.scaffold2.74	M11	OEP16-3; outer envelope pore protein 16-3	http://www.genome.jp/dbget-bin/www_bget?ath:AT2G42210
evm.TU.scaffold2001.7	M11	putative receptor-like protein kinase	http://www.genome.jp/dbget-bin/www_bget?ath:AT2G39360
evm.TU.scaffold21.11	M11	regulator of chromosome condensation-like protein	http://www.genome.jp/dbget-bin/www_bget?ath:AT1G27060
evm.TU.scaffold2198.10	M11	AL5; alfin-like 5 protein	http://www.genome.jp/dbget-bin/www_bget?ath:AT5G20510
evm.TU.scaffold2267.1	M11	--	--
evm.TU.scaffold2286.9	M11	RAB18; dehydrin Rab18	http://www.genome.jp/dbget-bin/www_bget?ath:AT5G66400
evm.TU.scaffold2336.4	M11	AL4; PHD finger protein ALFIN-LIKE 4	http://www.genome.jp/dbget-bin/www_bget?ath:AT5G26210
evm.TU.scaffold235.19	M11	--	--
evm.TU.scaffold235.22	M11	--	--
evm.TU.scaffold241.5	M11	BUBR1; BUB1-related protein BUBR1; K02178 checkpoint serine/threonine-protein kinase [EC:2.7.11.1]	http://www.genome.jp/dbget-bin/www_bget?ath:AT2G33560
evm.TU.scaffold241.6	M11	HL; PAP-specific phosphatase HAL2-like protein; K01082 3'(2'), 5'-bisphosphate nucleotidase [EC:3.1.3.7]	http://www.genome.jp/dbget-bin/www_bget?ath:AT5G54390
evm.TU.scaffold241.7	M11	BUBR1; BUB1-related protein BUBR1; K02178 checkpoint serine/threonine-protein kinase [EC:2.7.11.1]	http://www.genome.jp/dbget-bin/www_bget?ath:AT2G33560
evm.TU.scaffold2440.4	M11	AP-1 complex subunit sigma-2; K12394 AP-1 complex subunit sigma 1/2	http://www.genome.jp/dbget-bin/www_bget?ath:AT4G35410
evm.TU.scaffold245.61	M11	hypothetical protein	http://www.genome.jp/dbget-bin/www_bget?ath:AT3G25080
evm.TU.scaffold247.1	M11	--	--
evm.TU.scaffold247.2	M11	VPS2.1; vacuolar protein sorting-associated protein 2-1; K12191 charged multivesicular body protein 2A	http://www.genome.jp/dbget-bin/www_bget?ath:AT2G06530
evm.TU.scaffold247.8	M11	CML42; calcium-binding protein CML42; K13448 calcium-binding protein CML	http://www.genome.jp/dbget-bin/www_bget?ath:AT4G20780
evm.TU.scaffold2507.2	M11	hypothetical protein	http://www.genome.jp/dbget-bin/www_bget?ath:AT3G08890
evm.TU.scaffold256.4	M11	RNA-binding (RRM/RBD/RNP motifs) family protein	http://www.genome.jp/dbget-bin/www_bget?ath:AT5G03495
evm.TU.scaffold256.62	M11	Ycf37-like photosystem I biogenesis related protein	http://www.genome.jp/dbget-bin/www_bget?ath:AT1G22700
evm.TU.scaffold2595.4	M11	Papain family cysteine protease	http://www.genome.jp/dbget-bin/www_bget?ath:AT1G29080
evm.TU.scaffold2595.5	M11	EDL2; EID1-like F-box protein 2	http://www.genome.jp/dbget-bin/www_bget?ath:AT5G39360
evm.TU.scaffold2706.8	M11	IBR1; short-chain dehydrogenase/reductase A; K11147 dehydrogenase/reductase SDR family member 4 [EC:1.1.-.-]	http://www.genome.jp/dbget-bin/www_bget?ath:AT4G05530
evm.TU.scaffold271.19	M11	IMPA-2; importin alpha isoform 2	http://www.genome.jp/dbget-bin/www_bget?ath:AT4G16143
evm.TU.scaffold29.27	M11	myb-like HTH transcriptional regulator family protein	http://www.genome.jp/dbget-bin/www_bget?ath:AT5G58340
evm.TU.scaffold29.33	M11	ATM2; ABC transporter B family member 24; K05663 mitochondrial ABC transporter ATM	http://www.genome.jp/dbget-bin/www_bget?ath:AT4G28620
evm.TU.scaffold29.38	M11	hypothetical protein	http://www.genome.jp/dbget-bin/www_bget?ath:AT5G58250
evm.TU.scaffold29.52	M11	hypothetical protein	http://www.genome.jp/dbget-bin/www_bget?ath:AT5G58020
evm.TU.scaffold29.67	M11	--	--
evm.TU.scaffold311.6	M11	--	--
evm.TU.scaffold316.8	M11	Nucleic acid-binding, OB-fold-like protein	http://www.genome.jp/dbget-bin/www_bget?ath:AT1G14800
evm.TU.scaffold356.54	M11	NC domain-containing protein-related	http://www.genome.jp/dbget-bin/www_bget?ath:AT3G02700
evm.TU.scaffold383.21	M11	--	--
evm.TU.scaffold383.28	M11	--	--
evm.TU.scaffold383.4	M11	40S ribosomal protein S14-2; K02955 small subunit ribosomal protein S14e	http://www.genome.jp/dbget-bin/www_bget?ath:AT3G11510
evm.TU.scaffold3834.3	M11	O-methyltransferase-like protein	http://www.genome.jp/dbget-bin/www_bget?ath:AT1G33030
evm.TU.scaffold396.10	M11	glycerophosphoryl diester phosphodiesterase; K01126 glycerophosphoryl diester phosphodiesterase [EC:3.1.4.46]	http://www.genome.jp/dbget-bin/www_bget?ath:AT1G74210
evm.TU.scaffold398.11	M11	BGAL15; beta-galactosidase 15	http://www.genome.jp/dbget-bin/www_bget?ath:AT1G31740
evm.TU.scaffold401.3	M11	protease inhibitor/seed storage/LTP family protein	http://www.genome.jp/dbget-bin/www_bget?ath:AT1G70250
evm.TU.scaffold401.4	M11	putative receptor serine/threonine kinase	http://www.genome.jp/dbget-bin/www_bget?ath:AT4G18250
evm.TU.scaffold50.110	M11	SBP (S-ribonuclease binding protein) family protein; K19042 E3 ubiquitin-protein ligase BOI and related proteins [EC:6.3.2.19]	http://www.genome.jp/dbget-bin/www_bget?ath:AT4G35070
evm.TU.scaffold50.61	M11	ribosomal protein L10 family protein; K14815 mRNA turnover protein 4	http://www.genome.jp/dbget-bin/www_bget?ath:AT1G25260
evm.TU.scaffold509.1	M11	NUDX25; ppGpp pyrophosphohydrolase	http://www.genome.jp/dbget-bin/www_bget?ath:AT1G30110
evm.TU.scaffold51.42	M11	hypothetical protein	http://www.genome.jp/dbget-bin/www_bget?ath:AT1G05070
evm.TU.scaffold514.100_evm.TU.scaffold514.99	M11	protein binding / zinc ion binding protein	http://www.genome.jp/dbget-bin/www_bget?ath:AT5G18260
evm.TU.scaffold514.110	M11	anamorsin homolog	http://www.genome.jp/dbget-bin/www_bget?ath:AT5G18400
evm.TU.scaffold514.6	M11	Spc97 / Spc98 family of spindle pole body (SBP) component; K16569 gamma-tubulin complex component 2	http://www.genome.jp/dbget-bin/www_bget?ath:AT5G17410
evm.TU.scaffold514.7	M11	Spc97 / Spc98 family of spindle pole body (SBP) component; K16569 gamma-tubulin complex component 2	http://www.genome.jp/dbget-bin/www_bget?ath:AT5G17410
evm.TU.scaffold514.86	M11	hypothetical protein	http://www.genome.jp/dbget-bin/www_bget?ath:AT5G18130
evm.TU.scaffold514.91	M11	H/ACA ribonucleoprotein complex, subunit Gar1/Naf1 protein; K11128 H/ACA ribonucleoprotein complex subunit 1	http://www.genome.jp/dbget-bin/www_bget?ath:AT3G03920
evm.TU.scaffold52.113	M11	GSTU24; glutathione S-transferase TAU 24; K00799 glutathione S-transferase [EC:2.5.1.18]	http://www.genome.jp/dbget-bin/www_bget?ath:AT1G17170
evm.TU.scaffold53.13	M11	Basic-leucine zipper (bZIP) transcription factor family protein	http://www.genome.jp/dbget-bin/www_bget?ath:AT4G38900
evm.TU.scaffold53.19	M11	RCY1; ania-6a type arginine-rich cyclin	http://www.genome.jp/dbget-bin/www_bget?ath:AT2G26430
evm.TU.scaffold53.46	M11	hypothetical protein	http://www.genome.jp/dbget-bin/www_bget?ath:AT1G27300
evm.TU.scaffold53.50	M11	SPL11; squamosa promoter-binding-like protein 11	http://www.genome.jp/dbget-bin/www_bget?ath:AT1G27360
evm.TU.scaffold55.9	M11	--	--
evm.TU.scaffold586.11	M11	glyceraldehyde-3-phosphate dehydrogenase-like protein	http://www.genome.jp/dbget-bin/www_bget?ath:AT5G21060
evm.TU.scaffold586.18	M11	SUB; receptor-like kinase STRUBBELIG	http://www.genome.jp/dbget-bin/www_bget?ath:AT1G11130
evm.TU.scaffold641.7	M11	SSE1; peroxin-16; K13335 peroxin-16	http://www.genome.jp/dbget-bin/www_bget?ath:AT2G45690
evm.TU.scaffold649.2	M11	factor of DNA methylation 1	http://www.genome.jp/dbget-bin/www_bget?ath:AT1G15910
evm.TU.scaffold649.3	M11	polynucleotidyl transferase, ribonuclease H-like superfamily protein	http://www.genome.jp/dbget-bin/www_bget?ath:AT4G09490
evm.TU.scaffold649.4	M11	GMI1; gamma-irradiation and mitomycin c induced 1	http://www.genome.jp/dbget-bin/www_bget?ath:AT5G24280
evm.TU.scaffold678.1	M11	ZCF125; kinesin-like protein; K11498 centromeric protein E	http://www.genome.jp/dbget-bin/www_bget?ath:AT1G59540
evm.TU.scaffold688.11	M11	RER1; protein reticulata-related 1	http://www.genome.jp/dbget-bin/www_bget?ath:AT5G22790
evm.TU.scaffold690.5	M11	transcription regulator	http://www.genome.jp/dbget-bin/www_bget?ath:AT5G13240
evm.TU.scaffold704.1	M11	CJD1; protein CJD1	http://www.genome.jp/dbget-bin/www_bget?ath:AT1G08640
evm.TU.scaffold704.14	M11	CDC5; cell division cycle 5-like protein; K12860 pre-mRNA-splicing factor CDC5/CEF1	http://www.genome.jp/dbget-bin/www_bget?ath:AT1G09770
evm.TU.scaffold704.16	M11	CDC5; cell division cycle 5-like protein; K12860 pre-mRNA-splicing factor CDC5/CEF1	http://www.genome.jp/dbget-bin/www_bget?ath:AT1G09770
evm.TU.scaffold704.17	M11	CDC5; cell division cycle 5-like protein; K12860 pre-mRNA-splicing factor CDC5/CEF1	http://www.genome.jp/dbget-bin/www_bget?ath:AT1G09770
evm.TU.scaffold704.58	M11	hypothetical protein	http://www.genome.jp/dbget-bin/www_bget?ath:AT3G50685
evm.TU.scaffold704.6	M11	ATP binding microtubule motor family protein; K10401 kinesin family member 18/19	http://www.genome.jp/dbget-bin/www_bget?ath:AT1G18550
evm.TU.scaffold72.39	M11	--	--
evm.TU.scaffold72.59	M11	hypothetical protein	http://www.genome.jp/dbget-bin/www_bget?ath:AT1G23850
evm.TU.scaffold733.3	M11	7-hydroxymethyl chlorophyll a reductase; K18010 7-hydroxymethyl chlorophyll a reductase [EC:1.17.7.2]	http://www.genome.jp/dbget-bin/www_bget?ath:AT1G04620
evm.TU.scaffold733.4	M11	GTP-binding protein	http://www.genome.jp/dbget-bin/www_bget?ath:AT5G39960
evm.TU.scaffold744.18	M11	1,4-dihydroxy-2-naphthoyl-CoA thioesterase 1	http://www.genome.jp/dbget-bin/www_bget?ath:AT1G48320
evm.TU.scaffold744.22	M11	--	--
evm.TU.scaffold81.11	M11	--	--
evm.TU.scaffold817.13	M11	PAH2; phosphatidic acid phosphohydrolase 2; K15728 phosphatidate phosphatase LPIN [EC:3.1.3.4]	http://www.genome.jp/dbget-bin/www_bget?ath:AT5G42870
evm.TU.scaffold817.14	M11	P-loop containing nucleoside triphosphate hydrolases superfamily protein	http://www.genome.jp/dbget-bin/www_bget?ath:AT2G30630
evm.TU.scaffold817.15	M11	ankyrin repeat-containing protein	http://www.genome.jp/dbget-bin/www_bget?ath:AT3G09890
evm.TU.scaffold838.2	M11	hypothetical protein	http://www.genome.jp/dbget-bin/www_bget?ath:AT5G22270
evm.TU.scaffold838.5	M11	OFP10; Ovate family protein 10	http://www.genome.jp/dbget-bin/www_bget?ath:AT5G22240
evm.TU.scaffold842.16	M11	Indole glucosinolate O-methyltransferase 4	http://www.genome.jp/dbget-bin/www_bget?ath:AT1G21130
evm.TU.scaffold842.18	M11	TPP2; tripeptidyl peptidase II; K01280 tripeptidyl-peptidase II [EC:3.4.14.10]	http://www.genome.jp/dbget-bin/www_bget?ath:AT4G20850
evm.TU.scaffold842.2	M11	EXT3; extensin 3	http://www.genome.jp/dbget-bin/www_bget?ath:AT1G21310
evm.TU.scaffold842.7	M11	WAK5; wall-associated receptor kinase 5	http://www.genome.jp/dbget-bin/www_bget?ath:AT1G21230
novel.1077	M11	--
novel.1366	M11	putative wall-associated receptor kinase-like 11	http://www.genome.jp/dbget-bin/www_bget?ath:AT1G19390
novel.1373	M11	putative disease resistance protein RDL6/RF9	http://www.genome.jp/dbget-bin/www_bget?ath:AT1G59218
novel.1936	M11	--
novel.2029	M11	--
novel.2046	M11	ATP synthase subunit delta'; K02134 F-type H+-transporting ATPase subunit delta	http://www.genome.jp/dbget-bin/www_bget?ath:AT5G47030
novel.2047	M11	hypothetical protein	http://www.genome.jp/dbget-bin/www_bget?ath:AT2G41230
novel.2103	M11	GSL11; putative callose synthase 6; K11000 callose synthase [EC:2.4.1.-]	http://www.genome.jp/dbget-bin/www_bget?ath:AT3G59100
novel.2301	M11	putative receptor-like protein kinase	http://www.genome.jp/dbget-bin/www_bget?ath:AT3G47110
novel.2523	M11	--
novel.2871	M11	--
novel.2872	M11	ALATS; Alanyl-tRNA synthetase; K01872 alanyl-tRNA synthetase [EC:6.1.1.7]	http://www.genome.jp/dbget-bin/www_bget?ath:AT1G50200
novel.2968	M11	TGG2; myrosinase 2; K01237 myrosinase [EC:3.2.1.147]	http://www.genome.jp/dbget-bin/www_bget?ath:AT5G25980
novel.298	M11	MRH6; MORPHOGENESIS OF ROOT HAIR 6	http://www.genome.jp/dbget-bin/www_bget?ath:AT2G03720
novel.3149	M11	--
novel.3451	M11	--
novel.3511	M11	--
novel.3540	M11	--
novel.3818	M11	--
novel.892	M11	--
novel.895	M11	putative ADP-ribosylation factor GTPase-activating protein AGD11; K12486 stromal membrane-associated protein	http://www.genome.jp/dbget-bin/www_bget?ath:AT3G07940
evm.TU.scaffold1.101	M12	hypothetical protein	http://www.genome.jp/dbget-bin/www_bget?ath:AT5G09960
evm.TU.scaffold1.109	M12	TGA4; transcription factor TGA4; K14431 transcription factor TGA	http://www.genome.jp/dbget-bin/www_bget?ath:AT5G10030
evm.TU.scaffold1.110	M12	hypothetical protein	http://www.genome.jp/dbget-bin/www_bget?ath:AT5G10040
evm.TU.scaffold1.193	M12	serine-rich protein-like protein	http://www.genome.jp/dbget-bin/www_bget?ath:AT5G11090
evm.TU.scaffold1.2	M12	PK3; serine/threonine protein kinase 3; K08856 serine/threonine kinase 16 [EC:2.7.11.1]	http://www.genome.jp/dbget-bin/www_bget?ath:AT5G08160
evm.TU.scaffold1.244	M12	thioredoxin family protein	http://www.genome.jp/dbget-bin/www_bget?ath:AT5G11640
evm.TU.scaffold1.248	M12	--	--
evm.TU.scaffold1.25	M12	VQ motif-containing protein	http://www.genome.jp/dbget-bin/www_bget?ath:AT5G08480
evm.TU.scaffold1.273	M12	peptidyl-prolyl cis-trans isomerase	http://www.genome.jp/dbget-bin/www_bget?ath:AT4G17070
evm.TU.scaffold1.289	M12	hypothetical protein	http://www.genome.jp/dbget-bin/www_bget?ath:AT5G12240
evm.TU.scaffold1.3	M12	EMB1873; agmatine deiminase; K10536 agmatine deiminase [EC:3.5.3.12]	http://www.genome.jp/dbget-bin/www_bget?ath:AT5G08170
evm.TU.scaffold1.4	M12	H/ACA ribonucleoprotein complex subunit 2-like protein; K11129 H/ACA ribonucleoprotein complex subunit 2	http://www.genome.jp/dbget-bin/www_bget?ath:AT5G08180
evm.TU.scaffold1.54	M12	winged-helix DNA-binding transcription factor family protein	http://www.genome.jp/dbget-bin/www_bget?ath:AT5G08780
evm.TU.scaffold1.57	M12	KIWI; RNA polymerase II transcriptional coactivator KIWI	http://www.genome.jp/dbget-bin/www_bget?ath:AT5G09250
evm.TU.scaffold1.62	M12	VPS9B; vacuolar sorting protein 9 (VPS9) domain protein	http://www.genome.jp/dbget-bin/www_bget?ath:AT5G09320
evm.TU.scaffold1.64	M12	NAC082; NAC domain containing protein 82	http://www.genome.jp/dbget-bin/www_bget?ath:AT5G09330
evm.TU.scaffold1.72	M12	EXL2; protein EXORDIUM like 2	http://www.genome.jp/dbget-bin/www_bget?ath:AT5G64260
evm.TU.scaffold1.74	M12	CPuORF43; conserved peptide upstream open reading frame 43	http://www.genome.jp/dbget-bin/www_bget?ath:AT5G09461
evm.TU.scaffold10.144	M12	GSTU2; glutathione S-transferase tau 2; K00799 glutathione S-transferase [EC:2.5.1.18]	http://www.genome.jp/dbget-bin/www_bget?ath:AT2G29480
evm.TU.scaffold10.181	M12	CXIP4; CAX-interacting protein 4	http://www.genome.jp/dbget-bin/www_bget?ath:AT2G28910
evm.TU.scaffold1012.5	M12	LCD1; protein LOWER CELL DENSITY 1	http://www.genome.jp/dbget-bin/www_bget?ath:AT2G37860
evm.TU.scaffold1012.8	M12	--	--
evm.TU.scaffold1127.19	M12	hypothetical protein	http://www.genome.jp/dbget-bin/www_bget?ath:AT1G51100
evm.TU.scaffold1127.29	M12	cell redox homeostasis protein	http://www.genome.jp/dbget-bin/www_bget?ath:AT1G50950
evm.TU.scaffold1127.38	M12	hypothetical protein	http://www.genome.jp/dbget-bin/www_bget?ath:AT1G09470
evm.TU.scaffold1179.3	M12	calcium-independent phospholipase A	http://www.genome.jp/dbget-bin/www_bget?ath:AT4G19860
evm.TU.scaffold12.104	M12	WBC27; ABC transporter G family member 26	http://www.genome.jp/dbget-bin/www_bget?ath:AT3G13220
evm.TU.scaffold12.28	M12	NOP56; nucleolar protein NOP56-like protein; K14564 nucleolar protein 56	http://www.genome.jp/dbget-bin/www_bget?ath:AT1G56110
evm.TU.scaffold12.32	M12	--	--
evm.TU.scaffold12.41	M12	CSLE1; cellulose synthase-like protein E1	http://www.genome.jp/dbget-bin/www_bget?ath:AT1G55850
evm.TU.scaffold12.57	M12	ZML2; GATA transcription factor 28	http://www.genome.jp/dbget-bin/www_bget?ath:AT1G51600
evm.TU.scaffold13.11	M12	E13L3; glucan endo-1,3-beta-glucosidase-like protein 3	http://www.genome.jp/dbget-bin/www_bget?ath:AT5G08000
evm.TU.scaffold13.114	M12	EIF2_ALPHA; translation initiation factor eIF-2 alpha subunit; K03237 translation initiation factor 2 subunit 1	http://www.genome.jp/dbget-bin/www_bget?ath:AT5G05470
evm.TU.scaffold13.115	M12	RNA-binding (RRM/RBD/RNP motifs) family protein	http://www.genome.jp/dbget-bin/www_bget?ath:AT5G03480
evm.TU.scaffold13.116	M12	CDKC;1; cyclin-dependent kinase C;1; K08819 cyclin-dependent kinase 12/13 [EC:2.7.11.22 2.7.11.23]	http://www.genome.jp/dbget-bin/www_bget?ath:AT5G10270
evm.TU.scaffold13.117	M12	COP9; COP9 signalosome complex subunit 8; K12181 COP9 signalosome complex subunit 8	http://www.genome.jp/dbget-bin/www_bget?ath:AT4G14110
evm.TU.scaffold13.121	M12	TBR; protein TRICHOME BIREFRINGENCE	http://www.genome.jp/dbget-bin/www_bget?ath:AT5G06700
evm.TU.scaffold13.127	M12	LEA4-5; late embryogenesis abundant protein 4-5	http://www.genome.jp/dbget-bin/www_bget?ath:AT5G06760
evm.TU.scaffold13.154	M12	thioredoxin-related protein	http://www.genome.jp/dbget-bin/www_bget?ath:AT5G06430
evm.TU.scaffold13.18	M12	SNAP33; soluble N-ethylmaleimide-sensitive factor adaptor protein 33	http://www.genome.jp/dbget-bin/www_bget?ath:AT5G61210
evm.TU.scaffold13.20	M12	F-box/RNI-like/FBD-like domain-containing protein	http://www.genome.jp/dbget-bin/www_bget?ath:AT1G48400
evm.TU.scaffold13.50	M12	PMSR2; peptide methionine sulfoxide reductase A2; K07304 peptide-methionine (S)-S-oxide reductase [EC:1.8.4.11]	http://www.genome.jp/dbget-bin/www_bget?ath:AT5G07460
evm.TU.scaffold13.58	M12	hypothetical protein	http://www.genome.jp/dbget-bin/www_bget?ath:AT5G07380
evm.TU.scaffold13.69	M12	RBL3; RHOMBOID-like protein 3	http://www.genome.jp/dbget-bin/www_bget?ath:AT5G07250
evm.TU.scaffold13.70	M12	RBL3; RHOMBOID-like protein 3	http://www.genome.jp/dbget-bin/www_bget?ath:AT5G07250
evm.TU.scaffold13.85	M12	40S ribosomal protein S4-3; K02987 small subunit ribosomal protein S4e	http://www.genome.jp/dbget-bin/www_bget?ath:AT5G58420
evm.TU.scaffold13.94	M12	ST2A; sulfotransferase 2A	http://www.genome.jp/dbget-bin/www_bget?ath:AT5G07010
evm.TU.scaffold137.21	M12	ISU1; iron-sulfur cluster assembly protein 1	http://www.genome.jp/dbget-bin/www_bget?ath:AT4G22220
evm.TU.scaffold137.41	M12	S-adenosyl-L-methionine-dependent methyltransferase domain-containing protein	http://www.genome.jp/dbget-bin/www_bget?ath:AT4G22530
evm.TU.scaffold14.6	M12	aldose 1-epimerase family protein; K01792 glucose-6-phosphate 1-epimerase [EC:5.1.3.15]	http://www.genome.jp/dbget-bin/www_bget?ath:AT4G25900
evm.TU.scaffold14.65	M12	CPSUFE; chloroplast sulfur E	http://www.genome.jp/dbget-bin/www_bget?ath:AT4G26500
evm.TU.scaffold14.96	M12	SUMO1; small ubiquitin-related modifier 1; K12160 small ubiquitin-related modifier	http://www.genome.jp/dbget-bin/www_bget?ath:AT4G26840
evm.TU.scaffold155.40	M12	hypothetical protein	http://www.genome.jp/dbget-bin/www_bget?ath:AT1G52857
evm.TU.scaffold16.130	M12	HEMG2; protoporphyrinogen oxidase-like protein; K00231 oxygen-dependent protoporphyrinogen oxidase [EC:1.3.3.4]	http://www.genome.jp/dbget-bin/www_bget?ath:AT5G14220
evm.TU.scaffold16.157	M12	FtsJ-like methyltransferase family protein	http://www.genome.jp/dbget-bin/www_bget?ath:AT5G13830
evm.TU.scaffold16.189	M12	ubiquinol-cytochrome C reductase iron-sulfur subunit; K00411 ubiquinol-cytochrome c reductase iron-sulfur subunit [EC:1.10.2.2]	http://www.genome.jp/dbget-bin/www_bget?ath:AT5G13440
evm.TU.scaffold16.190	M12	ubiquinol-cytochrome C reductase iron-sulfur subunit; K00411 ubiquinol-cytochrome c reductase iron-sulfur subunit [EC:1.10.2.2]	http://www.genome.jp/dbget-bin/www_bget?ath:AT5G13430
evm.TU.scaffold16.63	M12	hypothetical protein	http://www.genome.jp/dbget-bin/www_bget?ath:AT5G15190
evm.TU.scaffold1811.32	M12	cleavage/polyadenylation specificity factor; K14397 cleavage and polyadenylation specificity factor subunit 5	http://www.genome.jp/dbget-bin/www_bget?ath:AT4G25550
evm.TU.scaffold1995.14	M12	hyaluronan mediated motility receptor-related protein	http://www.genome.jp/dbget-bin/www_bget?ath:AT5G06265
evm.TU.scaffold20.103	M12	CML42; calcium-binding protein CML42; K13448 calcium-binding protein CML	http://www.genome.jp/dbget-bin/www_bget?ath:AT4G20780
evm.TU.scaffold20.167	M12	winged-helix DNA-binding transcription factor family protein	http://www.genome.jp/dbget-bin/www_bget?ath:AT4G19630
evm.TU.scaffold20.180	M12	PDR11; ABC transporter G family member 39	http://www.genome.jp/dbget-bin/www_bget?ath:AT1G66950
evm.TU.scaffold20.199	M12	ankyrin repeat-containing protein	http://www.genome.jp/dbget-bin/www_bget?ath:AT4G19150
evm.TU.scaffold20.222	M12	cyclic phosphodiesterase	http://www.genome.jp/dbget-bin/www_bget?ath:AT4G18930
evm.TU.scaffold20.263	M12	D-Tyr-tRNA(Tyr) deacylase family protein; K07560 D-tyrosyl-tRNA(Tyr) deacylase [EC:3.1.-.-]	http://www.genome.jp/dbget-bin/www_bget?ath:AT4G18460
evm.TU.scaffold20.70	M12	hypothetical protein	http://www.genome.jp/dbget-bin/www_bget?ath:AT4G21140
evm.TU.scaffold20.73	M12	cytochrome-c oxidase/ electron carrier	http://www.genome.jp/dbget-bin/www_bget?ath:AT4G21105
evm.TU.scaffold20.74	M12	MFDX2; ferredoxin 2	http://www.genome.jp/dbget-bin/www_bget?ath:AT4G21090
evm.TU.scaffold20.91	M12	TUB9; tubulin beta-9 chain; K07375 tubulin beta	http://www.genome.jp/dbget-bin/www_bget?ath:AT4G20890
evm.TU.scaffold2101.13	M12	DHS; deoxyhypusine synthase; K00809 deoxyhypusine synthase [EC:2.5.1.46]	http://www.genome.jp/dbget-bin/www_bget?ath:AT5G05920
evm.TU.scaffold2101.15	M12	--	--
evm.TU.scaffold2101.9	M12	bifunctional inhibitor/lipid-transfer protein/seed storage 2S albumin superfamily protein	http://www.genome.jp/dbget-bin/www_bget?ath:AT5G05960
evm.TU.scaffold2137.10	M12	LEA4-5; late embryogenesis abundant protein 4-5	http://www.genome.jp/dbget-bin/www_bget?ath:AT5G06760
evm.TU.scaffold274.17	M12	amino acid dehydrogenase family protein; K00262 glutamate dehydrogenase (NADP+) [EC:1.4.1.4]	http://www.genome.jp/dbget-bin/www_bget?ath:AT1G51720
evm.TU.scaffold274.4	M12	reticulon-like protein B6	http://www.genome.jp/dbget-bin/www_bget?ath:AT3G61560
evm.TU.scaffold2755.2	M12	--	--
evm.TU.scaffold313.10	M12	protein CHLORORESPIRATORY REDUCTION 31	http://www.genome.jp/dbget-bin/www_bget?ath:AT4G23890
evm.TU.scaffold313.11	M12	hypothetical protein	http://www.genome.jp/dbget-bin/www_bget?ath:AT4G23885
evm.TU.scaffold313.16	M12	glycoside hydrolase family 28 protein / polygalacturonase (pectinase) family protein	http://www.genome.jp/dbget-bin/www_bget?ath:AT4G23820
evm.TU.scaffold313.37	M12	probable aminotransferase TAT4; K00815 tyrosine aminotransferase [EC:2.6.1.5]	http://www.genome.jp/dbget-bin/www_bget?ath:AT4G23590
evm.TU.scaffold313.59	M12	NAD(P)-binding Rossmann-fold superfamily protein	http://www.genome.jp/dbget-bin/www_bget?ath:AT4G23420
evm.TU.scaffold313.70_evm.TU.scaffold313.71	M12	CRK11; cysteine-rich receptor-like protein kinase 11	http://www.genome.jp/dbget-bin/www_bget?ath:AT4G23190
evm.TU.scaffold313.9	M12	nucleoside diphosphate kinase IV; K00940 nucleoside-diphosphate kinase [EC:2.7.4.6]	http://www.genome.jp/dbget-bin/www_bget?ath:AT4G23900
evm.TU.scaffold4.90	M12	40S ribosomal protein S23-2; K02973 small subunit ribosomal protein S23e	http://www.genome.jp/dbget-bin/www_bget?ath:AT5G02960
evm.TU.scaffold424.26	M12	ribosomal protein L35; K02916 large subunit ribosomal protein L35	http://www.genome.jp/dbget-bin/www_bget?ath:AT2G24090
evm.TU.scaffold424.27	M12	hypothetical protein	http://www.genome.jp/dbget-bin/www_bget?ath:AT2G22520
evm.TU.scaffold424.28	M12	hypothetical protein	http://www.genome.jp/dbget-bin/www_bget?ath:AT1G64840
evm.TU.scaffold424.38	M12	hypothetical protein	http://www.genome.jp/dbget-bin/www_bget?ath:AT1G64840
evm.TU.scaffold424.39	M12	ACA11; putative calcium-transporting ATPase 11; K01537 Ca2+-transporting ATPase [EC:3.6.3.8]	http://www.genome.jp/dbget-bin/www_bget?ath:AT3G57330
evm.TU.scaffold424.44	M12	alpha/beta-Hydrolases superfamily protein; K01285 lysosomal Pro-X carboxypeptidase [EC:3.4.16.2]	http://www.genome.jp/dbget-bin/www_bget?ath:AT2G24280
evm.TU.scaffold424.62	M12	60S acidic ribosomal protein P0-3; K02941 large subunit ribosomal protein LP0	http://www.genome.jp/dbget-bin/www_bget?ath:AT3G11250
evm.TU.scaffold5.136	M12	HSFA3; heat shock transcription factor A3; K09419 heat shock transcription factor, other eukaryote	http://www.genome.jp/dbget-bin/www_bget?ath:AT5G03720
evm.TU.scaffold5.155	M12	hypothetical protein	http://www.genome.jp/dbget-bin/www_bget?ath:AT5G04000
evm.TU.scaffold5.208	M12	VTE5; phytol kinase 1; K18678 phytol kinase [EC:2.7.1.182]	http://www.genome.jp/dbget-bin/www_bget?ath:AT5G04490
evm.TU.scaffold5.25	M12	NDP1; kinesin light chain-like protein	http://www.genome.jp/dbget-bin/www_bget?ath:AT5G02130
evm.TU.scaffold5.27	M12	hypothetical protein	http://www.genome.jp/dbget-bin/www_bget?ath:AT5G02160
evm.TU.scaffold5.29	M12	FHL; far-red-elongated hypocotyl1-like protein	http://www.genome.jp/dbget-bin/www_bget?ath:AT5G02200
evm.TU.scaffold5.61	M12	hypothetical protein	http://www.genome.jp/dbget-bin/www_bget?ath:AT2G41590
evm.TU.scaffold551.53	M12	hypothetical protein	http://www.genome.jp/dbget-bin/www_bget?ath:AT5G05300
evm.TU.scaffold574.18	M12	hypothetical protein	http://www.genome.jp/dbget-bin/www_bget?ath:AT4G24175
evm.TU.scaffold574.2	M12	hypothetical protein	http://www.genome.jp/dbget-bin/www_bget?ath:AT4G24026
evm.TU.scaffold574.3	M12	TRE1; trehalase 1; K01194 alpha,alpha-trehalase [EC:3.2.1.28]	http://www.genome.jp/dbget-bin/www_bget?ath:AT4G24040
evm.TU.scaffold574.34	M12	ubiquitin carboxyl-terminal hydrolase family protein	http://www.genome.jp/dbget-bin/www_bget?ath:AT4G24320
evm.TU.scaffold574.36	M12	phosphorylase family protein	http://www.genome.jp/dbget-bin/www_bget?ath:AT4G24340
evm.TU.scaffold574.43	M12	Rhamnogalacturonate lyase family protein; K18195 rhamnogalacturonan endolyase [EC:4.2.2.23]	http://www.genome.jp/dbget-bin/www_bget?ath:AT4G24430
evm.TU.scaffold63.27	M12	hypothetical protein	http://www.genome.jp/dbget-bin/www_bget?ath:AT4G24700
evm.TU.scaffold63.45	M12	protein transport protein sec61 subunit gamma-2; K07342 protein transport protein SEC61 subunit gamma and related proteins	http://www.genome.jp/dbget-bin/www_bget?ath:AT5G50460
evm.TU.scaffold63.46	M12	thylakoid lumenal protein 17.9	http://www.genome.jp/dbget-bin/www_bget?ath:AT4G24930
evm.TU.scaffold687.23	M12	--	--
evm.TU.scaffold687.5	M12	hypothetical protein	http://www.genome.jp/dbget-bin/www_bget?ath:AT1G52342
evm.TU.scaffold829.9	M12	putative disease resistance protein	http://www.genome.jp/dbget-bin/www_bget?ath:AT5G05400
evm.TU.scaffold841.26	M12	hypothetical protein	http://www.genome.jp/dbget-bin/www_bget?ath:AT5G13090
evm.TU.scaffold841.27	M12	hypothetical protein	http://www.genome.jp/dbget-bin/www_bget?ath:AT5G13100
evm.TU.scaffold841.9	M12	proline-rich family protein	http://www.genome.jp/dbget-bin/www_bget?ath:AT5G12880
evm.TU.scaffold905.10	M12	hypothetical protein	http://www.genome.jp/dbget-bin/www_bget?ath:AT1G52565
evm.TU.scaffold905.19	M12	peptidase S24/S26A/S26B/S26C family protein; K13280 signal peptidase, endoplasmic reticulum-type [EC:3.4.-.-]	http://www.genome.jp/dbget-bin/www_bget?ath:AT1G52600
evm.TU.scaffold905.4	M12	BGLU19; beta glucosidase 19; K01188 beta-glucosidase [EC:3.2.1.21]	http://www.genome.jp/dbget-bin/www_bget?ath:AT3G21370
evm.TU.scaffold944.41	M12	probable aminotransferase TAT4; K00815 tyrosine aminotransferase [EC:2.6.1.5]	http://www.genome.jp/dbget-bin/www_bget?ath:AT4G23590
novel.2102	M12	CLPC1; ATP-dependent Clp protease ATP-binding subunit ClpC; K03696 ATP-dependent Clp protease ATP-binding subunit ClpC	http://www.genome.jp/dbget-bin/www_bget?ath:AT5G50920
novel.2210	M12	--
novel.2287	M12	--
novel.232	M12	--
novel.2913	M12	hypothetical protein	http://www.genome.jp/dbget-bin/www_bget?ath:AT1G21280
novel.2914	M12	--
novel.2917	M12	TIR-NBS-LRR class disease resistance protein	http://www.genome.jp/dbget-bin/www_bget?ath:AT5G11250
novel.2920	M12	--
novel.2922	M12	--
novel.3143	M12	--
novel.341	M12	CID10; putative RNA-binding protein RBP37	http://www.genome.jp/dbget-bin/www_bget?ath:AT3G49390
novel.347	M12	--
novel.45	M12	PDF1.3; plant defensin 1.3	http://www.genome.jp/dbget-bin/www_bget?ath:AT2G26010
novel.488	M12	Myb/SANT-like DNA-binding domain-containing protein	http://www.genome.jp/dbget-bin/www_bget?ath:AT2G33550
novel.639	M12	TPR2; Topless-related 2 protein	http://www.genome.jp/dbget-bin/www_bget?ath:AT3G16830
novel.646	M12	NUC173 domain-containing protein; K14794 ribosomal RNA-processing protein 12	http://www.genome.jp/dbget-bin/www_bget?ath:AT2G34357
novel.920	M12	OTS2; ubiquitin-like-specific protease 1C; K16287 ubiquitin-like-specific protease 1C/D [EC:3.4.22.68]	http://www.genome.jp/dbget-bin/www_bget?ath:AT1G10570
evm.TU.scaffold101.37	M13	SIR; sulfite reductase; K00392 sulfite reductase (ferredoxin) [EC:1.8.7.1]	http://www.genome.jp/dbget-bin/www_bget?ath:AT5G04590
evm.TU.scaffold1121.7	M13	UBP10; ubiquitin-specific protease 10; K11835 ubiquitin carboxyl-terminal hydrolase 4/11/15 [EC:3.4.19.12]	http://www.genome.jp/dbget-bin/www_bget?ath:AT4G10590
evm.TU.scaffold1121.8	M13	kunitz family trypsin and protease inhibitor protein	http://www.genome.jp/dbget-bin/www_bget?ath:AT1G72290
evm.TU.scaffold1121.9	M13	MSI1; histone-binding protein MSI1; K10752 histone-binding protein RBBP4	http://www.genome.jp/dbget-bin/www_bget?ath:AT5G58230
evm.TU.scaffold1188.19	M13	ARID/BRIGHT DNA-binding domain-containing protein	http://www.genome.jp/dbget-bin/www_bget?ath:AT1G76510
evm.TU.scaffold1213.3	M13	SMO1-1; sterol-4alpha-methyl oxidase 1-1; K14423 4,4-dimethyl-9beta,19-cyclopropylsterol-4alpha-methyl oxidase [EC:1.14.13.72]	http://www.genome.jp/dbget-bin/www_bget?ath:AT4G12110
evm.TU.scaffold122.15	M13	CHX18; cation/H(+) antiporter 18	http://www.genome.jp/dbget-bin/www_bget?ath:AT5G41610
evm.TU.scaffold122.16	M13	hypothetical protein	http://www.genome.jp/dbget-bin/www_bget?ath:AT3G57110
evm.TU.scaffold122.35	M13	transcription factor bHLH94	http://www.genome.jp/dbget-bin/www_bget?ath:AT1G22490
evm.TU.scaffold122.4	M13	gibberellin-regulated protein 9	http://www.genome.jp/dbget-bin/www_bget?ath:AT1G22690
evm.TU.scaffold1326.15	M13	--	--
evm.TU.scaffold1326.5	M13	COL2; zinc finger protein CONSTANS-LIKE 2	http://www.genome.jp/dbget-bin/www_bget?ath:AT3G02380
evm.TU.scaffold1354.13	M13	hypothetical protein	http://www.genome.jp/dbget-bin/www_bget?ath:AT4G28300
evm.TU.scaffold1354.14	M13	hypothetical protein	http://www.genome.jp/dbget-bin/www_bget?ath:AT4G28300
evm.TU.scaffold1354.22	M13	hypothetical protein	http://www.genome.jp/dbget-bin/www_bget?ath:AT4G28460
evm.TU.scaffold1365.2	M13	--	--
evm.TU.scaffold1439.6	M13	ET2; effector of transcription2	http://www.genome.jp/dbget-bin/www_bget?ath:AT5G56780
evm.TU.scaffold1442.4_evm.TU.scaffold1442.8	M13	CAP1; cyclase associated protein 1; K17261 adenylyl cyclase-associated protein	http://www.genome.jp/dbget-bin/www_bget?ath:AT4G34490
evm.TU.scaffold1534.9	M13	--	--
evm.TU.scaffold1615.3	M13	--	--
evm.TU.scaffold1615.4	M13	hypothetical protein	http://www.genome.jp/dbget-bin/www_bget?ath:AT5G57120
evm.TU.scaffold1748.8	M13	hypothetical protein	http://www.genome.jp/dbget-bin/www_bget?ath:AT5G50840
evm.TU.scaffold175.31	M13	--	--
evm.TU.scaffold175.33	M13	--	--
evm.TU.scaffold179.27	M13	hypothetical protein	http://www.genome.jp/dbget-bin/www_bget?ath:AT5G54150
evm.TU.scaffold179.28	M13	CAT2; cationic amino acid transporter 2	http://www.genome.jp/dbget-bin/www_bget?ath:AT1G58030
evm.TU.scaffold179.29	M13	copper ion binding protein	http://www.genome.jp/dbget-bin/www_bget?ath:AT4G32610
evm.TU.scaffold1853.17	M13	cytochrome c oxidase subunit 5b-1; K02265 cytochrome c oxidase subunit 5b	http://www.genome.jp/dbget-bin/www_bget?ath:AT3G15640
evm.TU.scaffold1853.6	M13	hypothetical protein	http://www.genome.jp/dbget-bin/www_bget?ath:AT3G15534
evm.TU.scaffold1853.7	M13	hypothetical protein	http://www.genome.jp/dbget-bin/www_bget?ath:AT1G52857
evm.TU.scaffold194.6	M13	putative clathrin assembly protein	http://www.genome.jp/dbget-bin/www_bget?ath:AT1G14910
evm.TU.scaffold1944.14	M13	B-cell receptor-associated 31-like protein	http://www.genome.jp/dbget-bin/www_bget?ath:AT1G48440
evm.TU.scaffold1944.16	M13	PYD1; putative dihydropyrimidine dehydrogenase; K00207 dihydropyrimidine dehydrogenase (NADP+) [EC:1.3.1.2]	http://www.genome.jp/dbget-bin/www_bget?ath:AT3G17810
evm.TU.scaffold2293.2	M13	thioesterase family protein	http://www.genome.jp/dbget-bin/www_bget?ath:AT3G16175
evm.TU.scaffold2293.25	M13	NF-YB3; nuclear transcription factor Y subunit B-3	http://www.genome.jp/dbget-bin/www_bget?ath:AT4G14540
evm.TU.scaffold2352.3	M13	tetratricopeptide repeat domain-containing protein	http://www.genome.jp/dbget-bin/www_bget?ath:AT3G16760
evm.TU.scaffold2413.1	M13	--	--
evm.TU.scaffold2413.6	M13	NFU3; NifU-like protein 3	http://www.genome.jp/dbget-bin/www_bget?ath:AT4G25910
evm.TU.scaffold2432.6	M13	HEN2; protein HUA ENHANCER 2; K12598 ATP-dependent RNA helicase DOB1 [EC:3.6.4.13]	http://www.genome.jp/dbget-bin/www_bget?ath:AT2G06990
evm.TU.scaffold2548.3	M13	Pentatricopeptide repeat-containing protein	http://www.genome.jp/dbget-bin/www_bget?ath:AT1G22830
evm.TU.scaffold2548.4	M13	O-fucosyltransferase family protein	http://www.genome.jp/dbget-bin/www_bget?ath:AT1G52630
evm.TU.scaffold2556.7	M13	PRS3; ribose-phosphate pyrophosphokinase 3	http://www.genome.jp/dbget-bin/www_bget?ath:AT1G10700
evm.TU.scaffold2616.14	M13	--	--
evm.TU.scaffold2714.2	M13	calmodulin-binding protein	http://www.genome.jp/dbget-bin/www_bget?ath:AT5G04020
evm.TU.scaffold283.21	M13	Tautomerase/MIF superfamily protein	http://www.genome.jp/dbget-bin/www_bget?ath:AT3G51660
evm.TU.scaffold283.24	M13	CPuORF44; conserved peptide upstream open reading frame 44	http://www.genome.jp/dbget-bin/www_bget?ath:AT3G51632
evm.TU.scaffold283.33	M13	TIR-NBS-LRR class disease resistance protein	http://www.genome.jp/dbget-bin/www_bget?ath:AT3G51570
evm.TU.scaffold3024.3	M13	hypothetical protein	http://www.genome.jp/dbget-bin/www_bget?ath:AT3G14560
evm.TU.scaffold3024.4	M13	NTMC2T6.2; protein NTMC2T6.2	http://www.genome.jp/dbget-bin/www_bget?ath:AT3G14590
evm.TU.scaffold3115.7	M13	--	--
evm.TU.scaffold3210.1	M13	aluminum induced protein with YGL and LRDR motif	http://www.genome.jp/dbget-bin/www_bget?ath:AT3G22850
evm.TU.scaffold3318.3	M13	QSOX2; quiescin-sulfhydryl oxidase 2; K10758 thiol oxidase [EC:1.8.3.2]	http://www.genome.jp/dbget-bin/www_bget?ath:AT2G01270
evm.TU.scaffold3396.2	M13	MPK19; mitogen-activated protein kinase 19	http://www.genome.jp/dbget-bin/www_bget?ath:AT3G14720
evm.TU.scaffold3506.3	M13	P-loop containing nucleoside triphosphate hydrolases superfamily protein	http://www.genome.jp/dbget-bin/www_bget?ath:AT4G13030
evm.TU.scaffold391.12	M13	hypothetical protein	http://www.genome.jp/dbget-bin/www_bget?ath:AT5G52890
evm.TU.scaffold404.10	M13	--	--
evm.TU.scaffold404.9	M13	--	--
evm.TU.scaffold410.21	M13	MUR1; GDP-mannose 4,6 dehydratase 2; K01711 GDPmannose 4,6-dehydratase [EC:4.2.1.47]	http://www.genome.jp/dbget-bin/www_bget?ath:AT3G51160
evm.TU.scaffold410.34	M13	protein serine/threonine kinase; K07179 RIO kinase 2 [EC:2.7.11.1]	http://www.genome.jp/dbget-bin/www_bget?ath:AT3G51270
evm.TU.scaffold410.48	M13	--	--
evm.TU.scaffold410.55	M13	YLS2; strictosidine synthase-like 5	http://www.genome.jp/dbget-bin/www_bget?ath:AT3G51430
evm.TU.scaffold4217.2	M13	DEL1; E2F transcription factor-like E2FE	http://www.genome.jp/dbget-bin/www_bget?ath:AT3G48160
evm.TU.scaffold422.17	M13	HS1; heat stable protein 1	http://www.genome.jp/dbget-bin/www_bget?ath:AT3G17210
evm.TU.scaffold422.53	M13	putative protein phosphatase 2C	http://www.genome.jp/dbget-bin/www_bget?ath:AT3G16800
evm.TU.scaffold438.2	M13	Wound-responsive family protein	http://www.genome.jp/dbget-bin/www_bget?ath:AT4G33560
evm.TU.scaffold453.20	M13	hypothetical protein	http://www.genome.jp/dbget-bin/www_bget?ath:AT1G11170
evm.TU.scaffold453.27	M13	--	--
evm.TU.scaffold453.39	M13	sphingoid long-chain bases kinase 2	http://www.genome.jp/dbget-bin/www_bget?ath:AT2G46090
evm.TU.scaffold453.47	M13	hypothetical protein	http://www.genome.jp/dbget-bin/www_bget?ath:AT1G11440
evm.TU.scaffold453.48	M13	NRPB10; DNA-directed RNA polymerases II, IV and V subunit 10; K03007 DNA-directed RNA polymerases I, II, and III subunit RPABC5	http://www.genome.jp/dbget-bin/www_bget?ath:AT1G11475
evm.TU.scaffold453.82	M13	AHP2; homologous-pairing protein 2-like protein	http://www.genome.jp/dbget-bin/www_bget?ath:AT1G13330
evm.TU.scaffold467.38	M13	UBC32; ubiquitin-conjugating enzyme E2 32; K10578 ubiquitin-conjugating enzyme E2 J1 [EC:6.3.2.19]	http://www.genome.jp/dbget-bin/www_bget?ath:AT3G17000
evm.TU.scaffold477.21	M13	40S ribosomal protein S14-2; K02955 small subunit ribosomal protein S14e	http://www.genome.jp/dbget-bin/www_bget?ath:AT3G11510
evm.TU.scaffold515.2	M13	IAA9; auxin-responsive protein IAA9; K14484 auxin-responsive protein IAA	http://www.genome.jp/dbget-bin/www_bget?ath:AT5G65670
evm.TU.scaffold515.4	M13	--	--
evm.TU.scaffold515.5	M13	--	--
evm.TU.scaffold557.22	M13	2-oxoglutarate-Fe(II)-dependent oxygenase domain-containing protein; K06892 feruloyl-CoA ortho-hydroxylase [EC:1.14.11.-]	http://www.genome.jp/dbget-bin/www_bget?ath:AT3G50210
evm.TU.scaffold653.20	M13	hypothetical protein	http://www.genome.jp/dbget-bin/www_bget?ath:AT3G52105
evm.TU.scaffold653.3	M13	hypothetical protein	http://www.genome.jp/dbget-bin/www_bget?ath:AT3G52360
evm.TU.scaffold653.31	M13	ARM repeat superfamily protein; K14001 nucleotide exchange factor SIL1	http://www.genome.jp/dbget-bin/www_bget?ath:AT3G51980
evm.TU.scaffold659.17	M13	hypothetical protein	http://www.genome.jp/dbget-bin/www_bget?ath:AT4G27530
evm.TU.scaffold659.23	M13	B-box domain protein 28	http://www.genome.jp/dbget-bin/www_bget?ath:AT4G27310
evm.TU.scaffold659.25	M13	glycosyltransferase domain-containing protein; K03843 alpha-1,3/alpha-1,6-mannosyltransferase [EC:2.4.1.132 2.4.1.257]	http://www.genome.jp/dbget-bin/www_bget?ath:AT1G78800
evm.TU.scaffold659.26	M13	oxidoreductase family protein	http://www.genome.jp/dbget-bin/www_bget?ath:AT4G09670
evm.TU.scaffold659.27	M13	SESA4; seed storage albumin 4	http://www.genome.jp/dbget-bin/www_bget?ath:AT4G27170
evm.TU.scaffold659.8	M13	ankyrin repeat-containing protein	http://www.genome.jp/dbget-bin/www_bget?ath:AT4G11000
evm.TU.scaffold718.12	M13	--	--
evm.TU.scaffold775.8	M13	--	--
evm.TU.scaffold778.1	M13	TCTP; translationally-controlled tumor protein-like protein	http://www.genome.jp/dbget-bin/www_bget?ath:AT3G16640
evm.TU.scaffold778.10	M13	putative peroxidase; K00430 peroxidase [EC:1.11.1.7]	http://www.genome.jp/dbget-bin/www_bget?ath:AT4G33870
evm.TU.scaffold778.26	M13	putative eukaryotic LigT protein	http://www.genome.jp/dbget-bin/www_bget?ath:AT3G16220
evm.TU.scaffold778.27	M13	hypothetical protein	http://www.genome.jp/dbget-bin/www_bget?ath:AT3G16200
evm.TU.scaffold778.9	M13	--	--
evm.TU.scaffold789.8	M13	RING/U-box domain-containing protein	http://www.genome.jp/dbget-bin/www_bget?ath:AT4G26400
evm.TU.scaffold789.9	M13	--	--
evm.TU.scaffold794.20	M13	--	--
evm.TU.scaffold821.4	M13	ALF5; MATE efflux family protein ALF5; K03327 multidrug resistance protein, MATE family	http://www.genome.jp/dbget-bin/www_bget?ath:AT3G23560
evm.TU.scaffold847.10	M13	SAUR-like auxin-responsive protein; K14488 SAUR family protein	http://www.genome.jp/dbget-bin/www_bget?ath:AT5G53590
evm.TU.scaffold868.3	M13	60S ribosomal protein L22-2; K02891 large subunit ribosomal protein L22e	http://www.genome.jp/dbget-bin/www_bget?ath:AT3G05560
evm.TU.scaffold93.4	M13	zinc knuckle (CCHC-type) family protein	http://www.genome.jp/dbget-bin/www_bget?ath:AT2G07760
evm.TU.scaffold93.5	M13	ATP synthase subunit G protein; K02140 F-type H+-transporting ATPase subunit g	http://www.genome.jp/dbget-bin/www_bget?ath:AT4G26210
evm.TU.scaffold93.56	M13	F-box/kelch-repeat protein	http://www.genome.jp/dbget-bin/www_bget?ath:AT5G49000
evm.TU.scaffold93.57	M13	26S proteasome regulatory subunit Rpn7; K03037 26S proteasome regulatory subunit N7	http://www.genome.jp/dbget-bin/www_bget?ath:AT4G24820
evm.TU.scaffold932.1	M13	chaperone DnaJ-domain containing protein	http://www.genome.jp/dbget-bin/www_bget?ath:AT3G14200
evm.TU.scaffold932.12	M13	PME3; pectin methylesterase 3; K01051 pectinesterase [EC:3.1.1.11]	http://www.genome.jp/dbget-bin/www_bget?ath:AT3G14310
evm.TU.scaffold932.15	M13	peroxisomal (S)-2-hydroxy-acid oxidase GLO2; K11517 (S)-2-hydroxy-acid oxidase [EC:1.1.3.15]	http://www.genome.jp/dbget-bin/www_bget?ath:AT3G14415
evm.TU.scaffold932.2	M13	ESM1; epithiospecifier modifier 1	http://www.genome.jp/dbget-bin/www_bget?ath:AT3G14210
evm.TU.scaffold932.3	M13	GDSL esterase/lipase	http://www.genome.jp/dbget-bin/www_bget?ath:AT3G14220
evm.TU.scaffold932.4	M13	RAP2.2; ethylene-responsive transcription factor RAP2-2; K09286 EREBP-like factor	http://www.genome.jp/dbget-bin/www_bget?ath:AT3G14230
evm.TU.scaffold949.11	M13	--	--
evm.TU.scaffold949.16	M13	PRT1; E3 ubiquitin-protein ligase PRT1	http://www.genome.jp/dbget-bin/www_bget?ath:AT3G24800
evm.TU.scaffold961.13	M13	hypothetical protein	http://www.genome.jp/dbget-bin/www_bget?ath:AT1G22885
novel.1078	M13	CC-NBS-LRR class disease resistance protein	http://www.genome.jp/dbget-bin/www_bget?ath:AT1G58400
novel.1212	M13	--	--
novel.1213	M13	IDL3; protein IDA-LIKE 3	http://www.genome.jp/dbget-bin/www_bget?ath:AT5G09805
novel.1347	M13	putative low temperature and salt responsive protein	http://www.genome.jp/dbget-bin/www_bget?ath:AT4G30660
novel.1402	M13	--	--
novel.160	M13	--	--
novel.1989	M13	BMY2; beta-amylase 2	http://www.genome.jp/dbget-bin/www_bget?ath:AT5G45300
novel.2147	M13	MuDR family transposase	http://www.genome.jp/dbget-bin/www_bget?ath:AT1G64260
novel.226	M13	--	--
novel.227	M13	--	--
novel.2735	M13	--	--
novel.2774	M13	--	--
novel.2846	M13	--	--
novel.2950	M13	L-aspartase-like family protein; K01756 adenylosuccinate lyase [EC:4.3.2.2]	http://www.genome.jp/dbget-bin/www_bget?ath:AT4G18440
novel.3030	M13	--	--
novel.3060	M13	--	--
novel.3651	M13	--	--
novel.3682	M13	--	--
novel.376	M13	AGD9; putative ADP-ribosylation factor GTPase-activating protein AGD9; K12493 ADP-ribosylation factor GTPase-activating protein 2/3	http://www.genome.jp/dbget-bin/www_bget?ath:AT5G46750
novel.378	M13	COP1-interacting protein-like protein	http://www.genome.jp/dbget-bin/www_bget?ath:AT5G43310
novel.3998	M13	--	--
novel.4032	M13	--
novel.427	M13	--
evm.TU.scaffold1024.14	M14	TTN1; tubulin-folding cofactor D	http://www.genome.jp/dbget-bin/www_bget?ath:AT3G60740
evm.TU.scaffold1056.2	M14	--	--
evm.TU.scaffold1056.3	M14	CKA2; casein kinase II, alpha chain 2; K03097 casein kinase II subunit alpha [EC:2.7.11.1]	http://www.genome.jp/dbget-bin/www_bget?ath:AT3G50000
evm.TU.scaffold11.58	M14	RAD51; DNA repair protein RAD51-like 1; K04482 DNA repair protein RAD51	http://www.genome.jp/dbget-bin/www_bget?ath:AT5G20850
evm.TU.scaffold1112.5	M14	NTRA; NADPH-dependent thioredoxin reductase A; K00384 thioredoxin reductase (NADPH) [EC:1.8.1.9]	http://www.genome.jp/dbget-bin/www_bget?ath:AT2G17420
evm.TU.scaffold116.21	M14	CASP-like protein	http://www.genome.jp/dbget-bin/www_bget?ath:AT4G25040
evm.TU.scaffold1173.11	M14	60S ribosomal protein L22-2; K02891 large subunit ribosomal protein L22e	http://www.genome.jp/dbget-bin/www_bget?ath:AT3G05560
evm.TU.scaffold1197.4	M14	FaTA; fatA acyl-ACP thioesterase; K10782 fatty acyl-ACP thioesterase A [EC:3.1.2.14]	http://www.genome.jp/dbget-bin/www_bget?ath:AT3G25110
evm.TU.scaffold1226.1	M14	BPC6; basic pentacysteine 6	http://www.genome.jp/dbget-bin/www_bget?ath:AT5G42520
evm.TU.scaffold1226.2	M14	BPC6; basic pentacysteine 6	http://www.genome.jp/dbget-bin/www_bget?ath:AT5G42520
evm.TU.scaffold1226.9	M14	RWD domain-containing protein; K10640 E3 ubiquitin-protein ligase RNF25 [EC:6.3.2.19]	http://www.genome.jp/dbget-bin/www_bget?ath:AT3G60300
evm.TU.scaffold1256.3	M14	--	--
evm.TU.scaffold1267.25	M14	--	--
evm.TU.scaffold1278.3	M14	hypothetical protein	http://www.genome.jp/dbget-bin/www_bget?ath:AT3G53400
evm.TU.scaffold1278.34	M14	ribosomal protein S21e; K02971 small subunit ribosomal protein S21e	http://www.genome.jp/dbget-bin/www_bget?ath:AT5G27700
evm.TU.scaffold1278.4	M14	60S ribosomal protein L12-2; K02870 large subunit ribosomal protein L12e	http://www.genome.jp/dbget-bin/www_bget?ath:AT3G53430
evm.TU.scaffold135.30	M14	YSL1; metal-nicotianamine transporter YSL1	http://www.genome.jp/dbget-bin/www_bget?ath:AT4G24120
evm.TU.scaffold135.34	M14	hypothetical protein	http://www.genome.jp/dbget-bin/www_bget?ath:AT3G57990
evm.TU.scaffold135.58	M14	WRKY53; putative WRKY transcription factor 53	http://www.genome.jp/dbget-bin/www_bget?ath:AT4G23810
evm.TU.scaffold140.29	M14	DNAse I-like superfamily protein	http://www.genome.jp/dbget-bin/www_bget?ath:AT2G37440
evm.TU.scaffold1466.20	M14	RPL24A; 60S ribosomal protein L24-1; K02896 large subunit ribosomal protein L24e	http://www.genome.jp/dbget-bin/www_bget?ath:AT2G36620
evm.TU.scaffold152.39	M14	Kunitz family trypsin and protease inhibitor protein	http://www.genome.jp/dbget-bin/www_bget?ath:AT3G04320
evm.TU.scaffold1536.4	M14	DNA-binding storekeeper protein-related transcriptional regulator	http://www.genome.jp/dbget-bin/www_bget?ath:AT2G36340
evm.TU.scaffold1580.11	M14	hypothetical protein	http://www.genome.jp/dbget-bin/www_bget?ath:AT5G65300
evm.TU.scaffold1580.7	M14	CRK; actin related protein 2/3 complex, subunit 5A; K05754 actin related protein 2/3 complex, subunit 5	http://www.genome.jp/dbget-bin/www_bget?ath:AT4G01710
evm.TU.scaffold16.109	M14	pseudouridine synthase family protein; K03177 tRNA pseudouridine55 synthase [EC:5.4.99.25]	http://www.genome.jp/dbget-bin/www_bget?ath:AT5G14460
evm.TU.scaffold16.123	M14	30S ribosomal protein S13; K02952 small subunit ribosomal protein S13	http://www.genome.jp/dbget-bin/www_bget?ath:AT5G14320
evm.TU.scaffold16.48	M14	hypothetical protein	http://www.genome.jp/dbget-bin/www_bget?ath:AT5G15320
evm.TU.scaffold16.53	M14	hypothetical protein	http://www.genome.jp/dbget-bin/www_bget?ath:AT5G15265
evm.TU.scaffold16.83	M14	F-box protein	http://www.genome.jp/dbget-bin/www_bget?ath:AT1G47810
evm.TU.scaffold1693.13	M14	--	--
evm.TU.scaffold1693.15	M14	putative protein kinase	http://www.genome.jp/dbget-bin/www_bget?ath:AT3G57700
evm.TU.scaffold18.143	M14	FUS5; COP9 signalosome complex subunit 7; K12180 COP9 signalosome complex subunit 7	http://www.genome.jp/dbget-bin/www_bget?ath:AT1G02090
evm.TU.scaffold1985.2	M14	CYP76C2; cytochrome P450 76C2	http://www.genome.jp/dbget-bin/www_bget?ath:AT2G45570
evm.TU.scaffold1985.3	M14	CYP76C2; cytochrome P450 76C2	http://www.genome.jp/dbget-bin/www_bget?ath:AT2G45570
evm.TU.scaffold200.74	M14	PAP29; purple acid phosphatase 29	http://www.genome.jp/dbget-bin/www_bget?ath:AT5G63140
evm.TU.scaffold2094.11	M14	GUN1; pentatricopeptide-repeat protein GUN1	http://www.genome.jp/dbget-bin/www_bget?ath:AT2G31400
evm.TU.scaffold2094.12	M14	MARD1; hypothetical protein	http://www.genome.jp/dbget-bin/www_bget?ath:AT3G63210
evm.TU.scaffold2203.8	M14	FACTOR OF DNA METHYLATION 5	http://www.genome.jp/dbget-bin/www_bget?ath:AT1G80790
evm.TU.scaffold2220.1	M14	protein kinase superfamily protein	http://www.genome.jp/dbget-bin/www_bget?ath:AT1G71530
evm.TU.scaffold2320.9	M14	Glutathione S-transferase family protein	http://www.genome.jp/dbget-bin/www_bget?ath:AT4G19880
evm.TU.scaffold233.35	M14	nucleoside-triphosphatase/transmembrane receptor/nucleotide binding/ATP binding	http://www.genome.jp/dbget-bin/www_bget?ath:AT4G19500
evm.TU.scaffold2503.4	M14	PIP1A; aquaporin PIP1-1; K09872 aquaporin PIP	http://www.genome.jp/dbget-bin/www_bget?ath:AT3G61430
evm.TU.scaffold2724.3	M14	P-loop containing nucleoside triphosphate hydrolases superfamily protein	http://www.genome.jp/dbget-bin/www_bget?ath:AT4G24710
evm.TU.scaffold2861.5	M14	CCH; copper chaperone; K07213 copper chaperone	http://www.genome.jp/dbget-bin/www_bget?ath:AT3G56240
evm.TU.scaffold2998.3	M14	CYP97B3; cytochrome P450 97B3	http://www.genome.jp/dbget-bin/www_bget?ath:AT4G15110
evm.TU.scaffold3002.1	M14	BTI1; VIRB2-interacting protein 1	http://www.genome.jp/dbget-bin/www_bget?ath:AT4G23630
evm.TU.scaffold3002.2	M14	TRH1; potassium transporter; K03549 KUP system potassium uptake protein	http://www.genome.jp/dbget-bin/www_bget?ath:AT4G23640
evm.TU.scaffold303.4	M14	carboxylesterase	http://www.genome.jp/dbget-bin/www_bget?ath:AT4G22305
evm.TU.scaffold316.11	M14	putative pectinesterase/pectinesterase inhibitor 51	http://www.genome.jp/dbget-bin/www_bget?ath:AT5G09760
evm.TU.scaffold32.152	M14	BHLH038; transcription factor ORG2	http://www.genome.jp/dbget-bin/www_bget?ath:AT3G56970
evm.TU.scaffold3552.1	M14	NBP35; nucleotide binding protein 35	http://www.genome.jp/dbget-bin/www_bget?ath:AT5G50960
evm.TU.scaffold3552.4	M14	zinc finger protein-like protein	http://www.genome.jp/dbget-bin/www_bget?ath:AT3G62850
evm.TU.scaffold384.13	M14	PB1 domain-containing protein	http://www.genome.jp/dbget-bin/www_bget?ath:AT5G64430
evm.TU.scaffold384.17	M14	Inositol monophosphatase family protein; K03841 fructose-1,6-bisphosphatase I [EC:3.1.3.11]	http://www.genome.jp/dbget-bin/www_bget?ath:AT5G64380
evm.TU.scaffold384.28	M14	EXL2; protein EXORDIUM like 2	http://www.genome.jp/dbget-bin/www_bget?ath:AT5G64260
evm.TU.scaffold384.30	M14	MC3; metacaspase 3	http://www.genome.jp/dbget-bin/www_bget?ath:AT5G64240
evm.TU.scaffold400.26	M14	hypothetical protein	http://www.genome.jp/dbget-bin/www_bget?ath:AT5G65925
evm.TU.scaffold400.47	M14	UDP-Glycosyltransferase superfamily protein	http://www.genome.jp/dbget-bin/www_bget?ath:AT5G65685
evm.TU.scaffold433.23	M14	HSA32; protein HEAT-STRESS-ASSOCIATED 32	http://www.genome.jp/dbget-bin/www_bget?ath:AT4G21320
evm.TU.scaffold52.110	M14	VQ motif-containing protein	http://www.genome.jp/dbget-bin/www_bget?ath:AT1G17147
evm.TU.scaffold52.115	M14	GSTU26; glutathione S-transferase tau 26; K00799 glutathione S-transferase [EC:2.5.1.18]	http://www.genome.jp/dbget-bin/www_bget?ath:AT1G17190
evm.TU.scaffold52.126	M14	Metal-dependent phosphohydrolase; K06950 uncharacterized protein	http://www.genome.jp/dbget-bin/www_bget?ath:AT1G17330
evm.TU.scaffold52.135	M14	ELF4-L4; protein ELF4-like 4	http://www.genome.jp/dbget-bin/www_bget?ath:AT1G17455
evm.TU.scaffold52.141	M14	hypothetical protein	http://www.genome.jp/dbget-bin/www_bget?ath:AT1G17510
evm.TU.scaffold52.143	M14	TIM23-1; translocase of inner mitochondrial membrane 23; K17794 mitochondrial import inner membrane translocase subunit TIM23	http://www.genome.jp/dbget-bin/www_bget?ath:AT1G17530
evm.TU.scaffold52.150	M14	RNA recognition motif-containing protein; K12741 heterogeneous nuclear ribonucleoprotein A1/A3	http://www.genome.jp/dbget-bin/www_bget?ath:AT1G17640
evm.TU.scaffold52.158	M14	DNA-binding bromodomain-containing protein	http://www.genome.jp/dbget-bin/www_bget?ath:AT1G17790
evm.TU.scaffold52.172	M14	RLP12; CLAVATA2 -related protein	http://www.genome.jp/dbget-bin/www_bget?ath:AT1G71400
evm.TU.scaffold52.174	M14	translation elongation factor EF1A/initiation factor IF2gamma family protein; K03267 peptide chain release factor subunit 3	http://www.genome.jp/dbget-bin/www_bget?ath:AT1G18070
evm.TU.scaffold52.197	M14	EPR1; early-phytochrome-responsive1	http://www.genome.jp/dbget-bin/www_bget?ath:AT1G18330
evm.TU.scaffold52.206	M14	transmembrane Fragile-X-F-associated protein	http://www.genome.jp/dbget-bin/www_bget?ath:AT1G18470
evm.TU.scaffold52.217	M14	MAML-4; 2-isopropylmalate synthase; K01649 2-isopropylmalate synthase [EC:2.3.3.13]	http://www.genome.jp/dbget-bin/www_bget?ath:AT1G18500
evm.TU.scaffold52.236	M14	MYB47; myb domain protein 47; K09422 myb proto-oncogene protein, plant	http://www.genome.jp/dbget-bin/www_bget?ath:AT1G18710
evm.TU.scaffold52.276	M14	pathogenesis-related thaumatin-like protein	http://www.genome.jp/dbget-bin/www_bget?ath:AT1G19320
evm.TU.scaffold527.23	M14	--	--
evm.TU.scaffold570.26	M14	--	--
evm.TU.scaffold577.36	M14	MLP28; MLP-like protein 28	http://www.genome.jp/dbget-bin/www_bget?ath:AT1G70830
evm.TU.scaffold600.2	M14	PUB14; U-box domain-containing protein 14	http://www.genome.jp/dbget-bin/www_bget?ath:AT3G54850
evm.TU.scaffold600.3	M14	ribosomal protein L10 family protein; K14815 mRNA turnover protein 4	http://www.genome.jp/dbget-bin/www_bget?ath:AT1G25260
evm.TU.scaffold61.54	M14	pollen Ole e 1 allergen and extensin family protein	http://www.genome.jp/dbget-bin/www_bget?ath:AT5G47635
evm.TU.scaffold627.5	M14	60S ribosomal protein L35a-1; K02917 large subunit ribosomal protein L35Ae	http://www.genome.jp/dbget-bin/www_bget?ath:AT1G07070
evm.TU.scaffold726.46	M14	NRT2.6; high affinity nitrate transporter 2.6; K02575 MFS transporter, NNP family, nitrate/nitrite transporter	http://www.genome.jp/dbget-bin/www_bget?ath:AT3G45060
evm.TU.scaffold75.4	M14	--	--
evm.TU.scaffold75.6	M14	Thioredoxin superfamily protein	http://www.genome.jp/dbget-bin/www_bget?ath:AT1G76020
evm.TU.scaffold78.36	M14	hypothetical protein	http://www.genome.jp/dbget-bin/www_bget?ath:AT1G69090
evm.TU.scaffold78.40	M14	hypothetical protein; K14308 nuclear pore complex protein Nup54	http://www.genome.jp/dbget-bin/www_bget?ath:AT1G24310
evm.TU.scaffold800.13	M14	AGO1; protein argonaute 1; K11593 eukaryotic translation initiation factor 2C	http://www.genome.jp/dbget-bin/www_bget?ath:AT1G48410
evm.TU.scaffold800.42	M14	hypothetical protein	http://www.genome.jp/dbget-bin/www_bget?ath:AT5G59050
evm.TU.scaffold800.43	M14	RNA-binding KH domain-containing protein; K13162 poly(rC)-binding protein 2/3/4	http://www.genome.jp/dbget-bin/www_bget?ath:AT5G15270
evm.TU.scaffold885.2	M14	--	--
evm.TU.scaffold89.15	M14	GSTT1; glutathione S-transferase THETA 1; K00799 glutathione S-transferase [EC:2.5.1.18]	http://www.genome.jp/dbget-bin/www_bget?ath:AT5G41210
evm.TU.scaffold89.20	M14	beta-adaptin-like protein B; K12392 AP-1 complex subunit beta-1	http://www.genome.jp/dbget-bin/www_bget?ath:AT4G11380
evm.TU.scaffold894.3	M14	multiple organellar RNA editing factor 1	http://www.genome.jp/dbget-bin/www_bget?ath:AT4G20020
evm.TU.scaffold90.14	M14	RGF9; root meristem growth factor 9	http://www.genome.jp/dbget-bin/www_bget?ath:AT5G64770
evm.TU.scaffold90.18	M14	CDKC;1; cyclin-dependent kinase C;1; K08819 cyclin-dependent kinase 12/13 [EC:2.7.11.22 2.7.11.23]	http://www.genome.jp/dbget-bin/www_bget?ath:AT5G10270
evm.TU.scaffold90.33	M14	LIP1; protein LIGHT INSENSITIVE PERIOD1; K07933 Rab-like protein 3	http://www.genome.jp/dbget-bin/www_bget?ath:AT5G64813
evm.TU.scaffold90.34	M14	threonyl-tRNA synthetase; K01868 threonyl-tRNA synthetase [EC:6.1.1.3]	http://www.genome.jp/dbget-bin/www_bget?ath:AT5G26830
evm.TU.scaffold90.41	M14	ASN2; asparagine synthetase 2; K01953 asparagine synthase (glutamine-hydrolysing) [EC:6.3.5.4]	http://www.genome.jp/dbget-bin/www_bget?ath:AT5G65010
evm.TU.scaffold90.42	M14	Nucleotide-sugar transporter family protein; K15272 solute carrier family 35 (UDP-sugar transporter), member A1/2/3	http://www.genome.jp/dbget-bin/www_bget?ath:AT5G65000
evm.TU.scaffold90.43	M14	zinc finger protein-like protein	http://www.genome.jp/dbget-bin/www_bget?ath:AT3G62850
evm.TU.scaffold94.20	M14	Tudor1; TUDOR-SN protein 1; K15979 staphylococcal nuclease domain-containing protein 1	http://www.genome.jp/dbget-bin/www_bget?ath:AT5G07350
evm.TU.scaffold94.21	M14	transducin/WD40 domain-containing protein	http://www.genome.jp/dbget-bin/www_bget?ath:AT5G45760
evm.TU.scaffold94.32	M14	NYE1; protein NON-YELLOWING 1	http://www.genome.jp/dbget-bin/www_bget?ath:AT4G22920
evm.TU.scaffold970.19	M14	--	--
novel.1502	M14	putative polyol transporter 3	http://www.genome.jp/dbget-bin/www_bget?ath:AT2G18480
novel.1566	M14	--	--
novel.1669	M14	--	--
novel.1796	M14	--	--
novel.1955	M14	--	--
novel.2065	M14	--	--
novel.2498	M14	--	--
novel.2507	M14	--	--
novel.2989	M14	--	--
novel.2992	M14	--	--
novel.3102	M14	--	--
novel.3243	M14	--	--
novel.3704	M14	--	--
novel.3788	M14	--	--
novel.3968	M14	--	--
novel.614	M14	--	--
novel.890	M14	RUS4; protein ROOT UV-B SENSITIVE 4	http://www.genome.jp/dbget-bin/www_bget?ath:AT2G23470
evm.TU.scaffold1044.11	M15	aspartyl protease family protein	http://www.genome.jp/dbget-bin/www_bget?ath:AT5G19120
evm.TU.scaffold112.24	M15	--	--
evm.TU.scaffold112.49	M15	--	--
evm.TU.scaffold112.57	M15	GSTF3; glutathione S-transferase F3; K00799 glutathione S-transferase [EC:2.5.1.18]	http://www.genome.jp/dbget-bin/www_bget?ath:AT2G02930
evm.TU.scaffold1253.5	M15	Cytochrome b-c1 complex, subunit 8 protein	http://www.genome.jp/dbget-bin/www_bget?ath:AT5G05370
evm.TU.scaffold1288.12	M15	NOI; protein NOI	http://www.genome.jp/dbget-bin/www_bget?ath:AT5G55850
evm.TU.scaffold132.23	M15	--	--
evm.TU.scaffold1374.35	M15	Protein OBERON 3	http://www.genome.jp/dbget-bin/www_bget?ath:AT1G14740
evm.TU.scaffold143.22	M15	HSP17.6II; class II heat shock protein 17.6; K13993 HSP20 family protein	http://www.genome.jp/dbget-bin/www_bget?ath:AT5G12020
evm.TU.scaffold143.28	M15	hypothetical protein	http://www.genome.jp/dbget-bin/www_bget?ath:AT5G11970
evm.TU.scaffold143.42	M15	--	--
evm.TU.scaffold143.47	M15	CAM9; calmodulin-like protein 9; K13448 calcium-binding protein CML	http://www.genome.jp/dbget-bin/www_bget?ath:AT3G51920
evm.TU.scaffold1462.2	M15	MPK16; mitogen-activated protein kinase 16	http://www.genome.jp/dbget-bin/www_bget?ath:AT5G19010
evm.TU.scaffold1467.29	M15	HSP81-3; Heat shock protein 90-3; K04079 molecular chaperone HtpG	http://www.genome.jp/dbget-bin/www_bget?ath:AT5G56010
evm.TU.scaffold1489.10	M15	Munc13-like protein PATROL1	http://www.genome.jp/dbget-bin/www_bget?ath:AT5G06970
evm.TU.scaffold1489.11	M15	EMB1879; hypothetical protein	http://www.genome.jp/dbget-bin/www_bget?ath:AT5G49820
evm.TU.scaffold1489.12	M15	CYP77A5P; cytochrome P450, family 77, subfamily A, polypeptide 5 pseudogene	http://www.genome.jp/dbget-bin/www_bget?ath:AT3G18270
evm.TU.scaffold153.10	M15	--	--
evm.TU.scaffold153.2	M15	PAI2; phosphoribosylanthranilate isomerase 2; K01817 phosphoribosylanthranilate isomerase [EC:5.3.1.24]	http://www.genome.jp/dbget-bin/www_bget?ath:AT5G05590
evm.TU.scaffold154.23	M15	--	--
evm.TU.scaffold154.6	M15	ZIF1; zinc induced facilitator 1 proetin	http://www.genome.jp/dbget-bin/www_bget?ath:AT5G13740
evm.TU.scaffold161.56	M15	--	--
evm.TU.scaffold161.75	M15	Haloacid dehalogenase-like hydrolase (HAD) superfamily protein	http://www.genome.jp/dbget-bin/www_bget?ath:AT3G19595
evm.TU.scaffold1628.3	M15	--	--
evm.TU.scaffold1733.1	M15	hypothetical protein	http://www.genome.jp/dbget-bin/www_bget?ath:AT3G22550
evm.TU.scaffold1925.2	M15	CDPK-related kinase 2	http://www.genome.jp/dbget-bin/www_bget?ath:AT3G19100
evm.TU.scaffold1950.12	M15	RLK902; receptor-like kinase 902	http://www.genome.jp/dbget-bin/www_bget?ath:AT3G17840
evm.TU.scaffold212.28	M15	CALS5; callose synthase 5; K11000 callose synthase [EC:2.4.1.-]	http://www.genome.jp/dbget-bin/www_bget?ath:AT2G13680
evm.TU.scaffold2143.10	M15	60S ribosomal protein L38; K02923 large subunit ribosomal protein L38e	http://www.genome.jp/dbget-bin/www_bget?ath:AT3G59540
evm.TU.scaffold2143.3	M15	hypothetical protein	http://www.genome.jp/dbget-bin/www_bget?ath:AT2G43340
evm.TU.scaffold2185.3	M15	ALA-interacting subunit 3	http://www.genome.jp/dbget-bin/www_bget?ath:AT1G54320
evm.TU.scaffold2536.4	M15	--	--
evm.TU.scaffold270.28	M15	HSP20-like chaperone	http://www.genome.jp/dbget-bin/www_bget?ath:AT1G76780
evm.TU.scaffold270.3	M15	serine-rich protein-like protein	http://www.genome.jp/dbget-bin/www_bget?ath:AT5G11090
evm.TU.scaffold270.32	M15	RING/U-box superfamily protein	http://www.genome.jp/dbget-bin/www_bget?ath:AT5G10650
evm.TU.scaffold2832.3	M15	hypothetical protein	http://www.genome.jp/dbget-bin/www_bget?ath:AT3G19030
evm.TU.scaffold331.18	M15	SAG101; acyl hydrolase	http://www.genome.jp/dbget-bin/www_bget?ath:AT5G14930
evm.TU.scaffold331.36	M15	--	--
evm.TU.scaffold3353.7	M15	hypothetical protein	http://www.genome.jp/dbget-bin/www_bget?ath:AT3G15780
evm.TU.scaffold337.4	M15	P5CS1; delta1-pyrroline-5-carboxylate synthase 1; K12657 delta-1-pyrroline-5-carboxylate synthetase [EC:2.7.2.11 1.2.1.41]	http://www.genome.jp/dbget-bin/www_bget?ath:AT2G39800
evm.TU.scaffold348.15	M15	regulator of chromosome condensation 1	http://www.genome.jp/dbget-bin/www_bget?ath:AT3G15430
evm.TU.scaffold352.36	M15	SBPASE; Sedoheptulose-1,7-bisphosphatase; K01100 sedoheptulose-bisphosphatase [EC:3.1.3.37]	http://www.genome.jp/dbget-bin/www_bget?ath:AT3G55800
evm.TU.scaffold352.46	M15	AIG2-like protein	http://www.genome.jp/dbget-bin/www_bget?ath:AT3G28950
evm.TU.scaffold373.19	M15	haloacid dehalogenase-like hydrolase family protein	http://www.genome.jp/dbget-bin/www_bget?ath:AT2G38740
evm.TU.scaffold406.35	M15	peptidoglycan-binding LysM domain-containing protein	http://www.genome.jp/dbget-bin/www_bget?ath:AT5G08200
evm.TU.scaffold406.37	M15	NF-YB12; nuclear factor Y, subunit B12	http://www.genome.jp/dbget-bin/www_bget?ath:AT5G08190
evm.TU.scaffold411.28	M15	hypothetical protein	http://www.genome.jp/dbget-bin/www_bget?ath:AT1G51920
evm.TU.scaffold411.55	M15	reversably-glycosylated protein 5; K13379 reversibly glycosylated polypeptide / UDP-arabinopyranose mutase [EC:2.4.1.- 5.4.99.30]	http://www.genome.jp/dbget-bin/www_bget?ath:AT5G16510
evm.TU.scaffold424.43	M15	--	--
evm.TU.scaffold447.10	M15	TTG1; protein TRANSPARENT TESTA GLABRA 1; K11805 WD repeat-containing protein 68	http://www.genome.jp/dbget-bin/www_bget?ath:AT5G24520
evm.TU.scaffold447.27	M15	GSTL1; glutathione transferase lambda 1; K00799 glutathione S-transferase [EC:2.5.1.18]	http://www.genome.jp/dbget-bin/www_bget?ath:AT5G02780
evm.TU.scaffold447.45	M15	probable E3 ubiquitin-protein ligase LOG2	http://www.genome.jp/dbget-bin/www_bget?ath:AT3G09770
evm.TU.scaffold447.9	M15	DME; transcriptional activator DEMETER	http://www.genome.jp/dbget-bin/www_bget?ath:AT5G04560
evm.TU.scaffold485.58	M15	GAMT2; gibberellic acid methyltransferase 2; K18886 gibberellin A4 carboxyl methyltransferase [EC:2.1.1.276]	http://www.genome.jp/dbget-bin/www_bget?ath:AT5G56300
evm.TU.scaffold491.9	M15	calcineurin-like phosphoesterase domain-containing protein	http://www.genome.jp/dbget-bin/www_bget?ath:AT4G11800
evm.TU.scaffold520.19	M15	BMY3; putative beta-amylase BMY3	http://www.genome.jp/dbget-bin/www_bget?ath:AT5G18670
evm.TU.scaffold520.2	M15	Cox19-like CHCH family protein; K18177 cytochrome c oxidase assembly factor 4	http://www.genome.jp/dbget-bin/www_bget?ath:AT5G18920
evm.TU.scaffold520.36	M15	--	--
evm.TU.scaffold520.75	M15	HXXXD-type acyl-transferase family protein	http://www.genome.jp/dbget-bin/www_bget?ath:AT5G17540
evm.TU.scaffold536.26	M15	hypothetical protein	http://www.genome.jp/dbget-bin/www_bget?ath:AT5G55620
evm.TU.scaffold536.31	M15	putative serine/threonine-protein kinase WNK11; K08867 WNK lysine deficient protein kinase [EC:2.7.11.1]	http://www.genome.jp/dbget-bin/www_bget?ath:AT5G55560
evm.TU.scaffold536.41	M15	bifunctional inhibitor/lipid-transfer protein/seed storage 2S albumin-like protein	http://www.genome.jp/dbget-bin/www_bget?ath:AT5G55450
evm.TU.scaffold550.13	M15	--	--
evm.TU.scaffold550.14	M15	--	--
evm.TU.scaffold563.5	M15	ADA2A; transcriptional adapter ADA2a; K11314 transcriptional adapter 2-alpha	http://www.genome.jp/dbget-bin/www_bget?ath:AT3G07740
evm.TU.scaffold579.39	M15	--	--
evm.TU.scaffold59.62	M15	RGS1; putative membrane receptor protein RGS1	http://www.genome.jp/dbget-bin/www_bget?ath:AT3G26090
evm.TU.scaffold6.11	M15	hypothetical protein	http://www.genome.jp/dbget-bin/www_bget?ath:AT2G46630
evm.TU.scaffold6.38	M15	DECOY; protein decoy; K17427 large subunit ribosomal protein L46	http://www.genome.jp/dbget-bin/www_bget?ath:AT1G14620
evm.TU.scaffold6.75	M15	RPS13A; 40S ribosomal protein S13-2; K02953 small subunit ribosomal protein S13e	http://www.genome.jp/dbget-bin/www_bget?ath:AT4G00100
evm.TU.scaffold625.16	M15	PRA1.A2; PRA1 family protein A2	http://www.genome.jp/dbget-bin/www_bget?ath:AT5G05987
evm.TU.scaffold625.17	M15	DFB; folylpolyglutamate synthase 1; K01930 folylpolyglutamate synthase [EC:6.3.2.17]	http://www.genome.jp/dbget-bin/www_bget?ath:AT5G05980
evm.TU.scaffold631.7	M15	CLPX; CLP protease regulatory subunit X; K03544 ATP-dependent Clp protease ATP-binding subunit ClpX	http://www.genome.jp/dbget-bin/www_bget?ath:AT5G53350
evm.TU.scaffold644.8	M15	PDR11; ABC transporter G family member 39	http://www.genome.jp/dbget-bin/www_bget?ath:AT1G66950
evm.TU.scaffold658.5	M15	--	--
evm.TU.scaffold664.13	M15	GDSL esterase/lipase	http://www.genome.jp/dbget-bin/www_bget?ath:AT5G03610
evm.TU.scaffold70.67	M15	NADH dehydrogenase-like complex N	http://www.genome.jp/dbget-bin/www_bget?ath:AT5G58260
evm.TU.scaffold71.59	M15	putative formyltetrahydrofolate deformylase; K01433 formyltetrahydrofolate deformylase [EC:3.5.1.10]	http://www.genome.jp/dbget-bin/www_bget?ath:AT4G17360
evm.TU.scaffold74.129	M15	putative protein kinase	http://www.genome.jp/dbget-bin/www_bget?ath:AT2G41970
evm.TU.scaffold756.34	M15	HTB2; histone H2B; K11252 histone H2B	http://www.genome.jp/dbget-bin/www_bget?ath:AT5G22880
evm.TU.scaffold76.10	M15	protein kinase family protein	http://www.genome.jp/dbget-bin/www_bget?ath:AT3G22750
evm.TU.scaffold77.48	M15	Calcineurin-like metallo-phosphoesterase superfamily protein	http://www.genome.jp/dbget-bin/www_bget?ath:AT5G58200
evm.TU.scaffold796.9	M15	CIPK2; CBL-interacting protein kinase 2	http://www.genome.jp/dbget-bin/www_bget?ath:AT5G07070
novel.108	M15	PREP1; zinc metalloprotease pitrilysin subfamily A; K06972	http://www.genome.jp/dbget-bin/www_bget?ath:AT3G19170
novel.1175	M15	GSTF3; glutathione S-transferase F3; K00799 glutathione S-transferase [EC:2.5.1.18]	http://www.genome.jp/dbget-bin/www_bget?ath:AT2G02930
novel.1324	M15	--	--
novel.1447	M15	ATR2; NADPH--cytochrome P450 reductase 2; K00327 NADPH-ferrihemoprotein reductase [EC:1.6.2.4]	http://www.genome.jp/dbget-bin/www_bget?ath:AT4G30210
novel.1488	M15	hypothetical protein	http://www.genome.jp/dbget-bin/www_bget?ath:AT2G13770
novel.2298	M15	RLP24; receptor like protein 24	http://www.genome.jp/dbget-bin/www_bget?ath:AT2G33020
novel.2708	M15	hypothetical protein	http://www.genome.jp/dbget-bin/www_bget?ath:ArthMp075
novel.2709	M15	SNF1-related protein kinase regulatory subunit beta-2; K07199 5'-AMP-activated protein kinase, regulatory beta subunit	http://www.genome.jp/dbget-bin/www_bget?ath:AT4G16360
novel.2957	M15	--	--
novel.3002	M15	BED zinc finger and hAT dimerization domain-containing protein	http://www.genome.jp/dbget-bin/www_bget?ath:AT3G42170
novel.3240	M15	--	--
novel.3400	M15	--	--
novel.3757	M15	--	--
novel.564	M15	--	--
novel.765	M15	--	--
novel.938	M15	--	--
evm.TU.scaffold11.25	M16	LCR81; low-molecular-weight cysteine-rich 81	http://www.genome.jp/dbget-bin/www_bget?ath:AT2G25295
evm.TU.scaffold116.49	M16	Double Clp-N motif protein	http://www.genome.jp/dbget-bin/www_bget?ath:AT4G25370
evm.TU.scaffold123.58	M16	hypothetical protein	http://www.genome.jp/dbget-bin/www_bget?ath:AT1G65090
evm.TU.scaffold1301.17	M16	probable fructokinase-2; K00847 fructokinase [EC:2.7.1.4]	http://www.genome.jp/dbget-bin/www_bget?ath:AT1G06030
evm.TU.scaffold14.215	M16	putative wound-responsive protein	http://www.genome.jp/dbget-bin/www_bget?ath:AT4G28240
evm.TU.scaffold14.219	M16	LLG3; LORELEI-like-GPI anchored protein 3	http://www.genome.jp/dbget-bin/www_bget?ath:AT4G28280
evm.TU.scaffold15.120	M16	NINJA; novel interactor of JAZ	http://www.genome.jp/dbget-bin/www_bget?ath:AT4G28910
evm.TU.scaffold15.14	M16	--	--
evm.TU.scaffold15.15	M16	--	--
evm.TU.scaffold15.16	M16	VEL1; vernalization5/VIN3-like protein	http://www.genome.jp/dbget-bin/www_bget?ath:AT4G30200
evm.TU.scaffold15.49	M16	CFIM-25; CFIM-25-like protein; K14397 cleavage and polyadenylation specificity factor subunit 5	http://www.genome.jp/dbget-bin/www_bget?ath:AT4G29820
evm.TU.scaffold15.54	M16	cysteine/histidine-rich C1 domain-containing protein	http://www.genome.jp/dbget-bin/www_bget?ath:AT4G01910
evm.TU.scaffold18.115	M16	Erythronate-4-phosphate dehydrogenase-like protein	http://www.genome.jp/dbget-bin/www_bget?ath:AT1G01500
evm.TU.scaffold18.45	M16	NETWORKED 3A	http://www.genome.jp/dbget-bin/www_bget?ath:AT1G03470
evm.TU.scaffold18.68	M16	probable LRR receptor-like serine/threonine-protein kinase	http://www.genome.jp/dbget-bin/www_bget?ath:AT1G07560
evm.TU.scaffold1894.18	M16	putative S-ribonuclease binding protein; K19042 E3 ubiquitin-protein ligase BOI and related proteins [EC:6.3.2.19]	http://www.genome.jp/dbget-bin/www_bget?ath:AT1G60610
evm.TU.scaffold1894.3	M16	FED_A; ferredoxin-2; K02639 ferredoxin	http://www.genome.jp/dbget-bin/www_bget?ath:AT1G60950
evm.TU.scaffold1894.7	M16	AGD4; ADP-ribosylation factor GTPase-activating protein AGD4; K12489 Arf-GAP with coiled-coil, ANK repeat and PH domain-containing protein	http://www.genome.jp/dbget-bin/www_bget?ath:AT1G10870
evm.TU.scaffold190.20	M16	MAPKKK13; mitogen-activated protein kinase kinase kinase 13	http://www.genome.jp/dbget-bin/www_bget?ath:AT1G07150
evm.TU.scaffold190.49	M16	2-oxoglutarate-dependent dioxygenase-like protein	http://www.genome.jp/dbget-bin/www_bget?ath:AT1G06650
evm.TU.scaffold190.54	M16	--	--
evm.TU.scaffold225.22	M16	GALK; galactokinase; K18674 N-acetylgalactosamine kinase [EC:2.7.1.157]	http://www.genome.jp/dbget-bin/www_bget?ath:AT3G06580
evm.TU.scaffold2304.1	M16	NADPH-dependent pterin aldehyde reductase	http://www.genome.jp/dbget-bin/www_bget?ath:AT1G10310
evm.TU.scaffold2304.11	M16	NFXL1; NF-X1-type zinc finger protein NFXL1; K12236 transcriptional repressor NF-X1 [EC:6.3.2.-]	http://www.genome.jp/dbget-bin/www_bget?ath:AT1G10170
evm.TU.scaffold2304.12	M16	Carbohydrate-binding protein	http://www.genome.jp/dbget-bin/www_bget?ath:AT1G10150
evm.TU.scaffold2304.3	M16	core-2/I-branching beta-1,6-N-acetylglucosaminyltransferase family protein	http://www.genome.jp/dbget-bin/www_bget?ath:AT1G10280
evm.TU.scaffold2304.9	M16	hypothetical protein	http://www.genome.jp/dbget-bin/www_bget?ath:AT1G10180
evm.TU.scaffold2434.2	M16	PHOS32; universal stress protein PHOS32	http://www.genome.jp/dbget-bin/www_bget?ath:AT5G54430
evm.TU.scaffold2493.2	M16	multiple organellar RNA editing factor 9	http://www.genome.jp/dbget-bin/www_bget?ath:AT1G11430
evm.TU.scaffold27.106	M16	PDF1.4; defensin-like protein 19	http://www.genome.jp/dbget-bin/www_bget?ath:AT1G19610
evm.TU.scaffold27.115	M16	reduced residual arabinose 3	http://www.genome.jp/dbget-bin/www_bget?ath:AT1G19360
evm.TU.scaffold27.123	M16	DA1; protein DA1	http://www.genome.jp/dbget-bin/www_bget?ath:AT1G19270
evm.TU.scaffold27.127	M16	probable carboxylesterase 1	http://www.genome.jp/dbget-bin/www_bget?ath:AT1G19190
evm.TU.scaffold27.128	M16	JAZ1; jasmonate-zim-domain protein 1; K13464 jasmonate ZIM domain-containing protein	http://www.genome.jp/dbget-bin/www_bget?ath:AT1G19180
evm.TU.scaffold27.157	M16	MYB47; myb domain protein 47; K09422 myb proto-oncogene protein, plant	http://www.genome.jp/dbget-bin/www_bget?ath:AT1G18710
evm.TU.scaffold27.17	M16	DMC1; meiotic recombination protein DMC1-like protein; K10872 meiotic recombination protein DMC1	http://www.genome.jp/dbget-bin/www_bget?ath:AT3G22880
evm.TU.scaffold27.180	M16	acyl-CoA N-acyltransferases-like protein	http://www.genome.jp/dbget-bin/www_bget?ath:AT1G18335
evm.TU.scaffold27.185	M16	RABA6b; Ras-related protein RABA6b	http://www.genome.jp/dbget-bin/www_bget?ath:AT1G18200
evm.TU.scaffold27.20	M16	putative protein kinase	http://www.genome.jp/dbget-bin/www_bget?ath:AT1G21590
evm.TU.scaffold27.210	M16	D-3-phosphoglycerate dehydrogenase; K00058 D-3-phosphoglycerate dehydrogenase [EC:1.1.1.95]	http://www.genome.jp/dbget-bin/www_bget?ath:AT1G17745
evm.TU.scaffold27.28	M16	thiamin diphosphate-binding fold protein; K00166 2-oxoisovalerate dehydrogenase E1 component alpha subunit [EC:1.2.4.4]	http://www.genome.jp/dbget-bin/www_bget?ath:AT1G21400
evm.TU.scaffold27.30	M16	--	--
evm.TU.scaffold27.36	M16	WAK5; wall-associated receptor kinase 5	http://www.genome.jp/dbget-bin/www_bget?ath:AT1G21230
evm.TU.scaffold27.42	M16	indole glucosinolate o-methyltransferase 1	http://www.genome.jp/dbget-bin/www_bget?ath:AT1G21100
evm.TU.scaffold27.54	M16	RNA recognition motif-containing protein	http://www.genome.jp/dbget-bin/www_bget?ath:AT1G76460
evm.TU.scaffold27.62	M16	hypothetical protein	http://www.genome.jp/dbget-bin/www_bget?ath:AT1G20770
evm.TU.scaffold27.92	M16	APS2; ATP sulfurylase 2; K13811 3'-phosphoadenosine 5'-phosphosulfate synthase [EC:2.7.7.4 2.7.1.25]	http://www.genome.jp/dbget-bin/www_bget?ath:AT1G19920
evm.TU.scaffold277.128	M16	microfibrillar-associated protein-like protein; K13110 microfibrillar-associated protein 1	http://www.genome.jp/dbget-bin/www_bget?ath:AT4G08580
evm.TU.scaffold277.21	M16	adenine nucleotide alpha hydrolases-like protein	http://www.genome.jp/dbget-bin/www_bget?ath:AT1G09740
evm.TU.scaffold277.24	M16	HYL1; double-stranded RNA-binding protein 1	http://www.genome.jp/dbget-bin/www_bget?ath:AT1G09700
evm.TU.scaffold277.25	M16	60S ribosomal protein L21-1; K02889 large subunit ribosomal protein L21e	http://www.genome.jp/dbget-bin/www_bget?ath:AT1G09690
evm.TU.scaffold3284.5	M16	hypothetical protein	http://www.genome.jp/dbget-bin/www_bget?ath:AT1G09310
evm.TU.scaffold332.19	M16	hypothetical protein	http://www.genome.jp/dbget-bin/www_bget?ath:AT3G62620
evm.TU.scaffold432.45	M16	HEXO2; beta-hexosaminidase 2; K12373 hexosaminidase [EC:3.2.1.52]	http://www.genome.jp/dbget-bin/www_bget?ath:AT1G05590
evm.TU.scaffold56.163	M16	probable transmembrane ascorbate ferrireductase 3; K08360 cytochrome b-561	http://www.genome.jp/dbget-bin/www_bget?ath:AT1G14730
evm.TU.scaffold60.101	M16	--	--
evm.TU.scaffold60.111	M16	hypothetical protein	http://www.genome.jp/dbget-bin/www_bget?ath:AT1G10410
evm.TU.scaffold60.113	M16	Trypsin family protein with PDZ domain; K01362 [EC:3.4.21.-]	http://www.genome.jp/dbget-bin/www_bget?ath:AT5G27660
evm.TU.scaffold60.127	M16	LRR_XI-23; leucine-rich receptor-like protein kinase	http://www.genome.jp/dbget-bin/www_bget?ath:AT1G09970
evm.TU.scaffold60.137	M16	--	--
evm.TU.scaffold60.138	M16	--	--
evm.TU.scaffold60.139	M16	U2A'; U2 small nuclear ribonucleoprotein A'; K11092 U2 small nuclear ribonucleoprotein A'	http://www.genome.jp/dbget-bin/www_bget?ath:AT1G09760
evm.TU.scaffold60.142	M16	cpHsc70-1; chloroplast heat shock protein 70-1; K03283 heat shock 70kDa protein 1/8	http://www.genome.jp/dbget-bin/www_bget?ath:AT4G24280
evm.TU.scaffold60.143	M16	60S ribosomal protein L21-1; K02889 large subunit ribosomal protein L21e	http://www.genome.jp/dbget-bin/www_bget?ath:AT1G09690
evm.TU.scaffold60.149	M16	GLP5; germin-like protein 5	http://www.genome.jp/dbget-bin/www_bget?ath:AT1G09560
evm.TU.scaffold60.164	M16	UBP15; ubiquitin carboxyl-terminal hydrolase 15; K11855 ubiquitin carboxyl-terminal hydrolase 36/42 [EC:3.4.19.12]	http://www.genome.jp/dbget-bin/www_bget?ath:AT1G17110
evm.TU.scaffold60.180	M16	--	--
evm.TU.scaffold60.187	M16	SCRL3; SCR-like 3	http://www.genome.jp/dbget-bin/www_bget?ath:AT1G08695
evm.TU.scaffold60.192	M16	pentatricopeptide repeat-containing protein	http://www.genome.jp/dbget-bin/www_bget?ath:AT1G08610
evm.TU.scaffold60.195	M16	ACHT4; atypical CYS HIS rich thioredoxin 4	http://www.genome.jp/dbget-bin/www_bget?ath:AT1G08570
evm.TU.scaffold60.231	M16	ribosomal protein L29 family protein; K17428 large subunit ribosomal protein L47	http://www.genome.jp/dbget-bin/www_bget?ath:AT1G07830
evm.TU.scaffold60.85	M16	putative pectin methylesterase/invertase inhibitor	http://www.genome.jp/dbget-bin/www_bget?ath:AT1G10770
evm.TU.scaffold651.31	M16	--	--
evm.TU.scaffold661.102	M16	MAPKKK13; mitogen-activated protein kinase kinase kinase 13	http://www.genome.jp/dbget-bin/www_bget?ath:AT1G07150
evm.TU.scaffold661.49	M16	--	--
evm.TU.scaffold661.55	M16	hypothetical protein	http://www.genome.jp/dbget-bin/www_bget?ath:AT1G20100
evm.TU.scaffold661.90	M16	UGT71C5; UDP-glucosyl transferase 71C5	http://www.genome.jp/dbget-bin/www_bget?ath:AT1G07240
evm.TU.scaffold726.35	M16	--	--
evm.TU.scaffold74.162	M16	LPAT2; lysophosphatidyl acyltransferase 2; K13523 lysophosphatidic acid acyltransferase / lysophosphatidylinositol acyltransferase [EC:2.3.1.51 2.3.1.-]	http://www.genome.jp/dbget-bin/www_bget?ath:AT3G57650
evm.TU.scaffold8.1	M16	D-3-phosphoglycerate dehydrogenase; K00058 D-3-phosphoglycerate dehydrogenase [EC:1.1.1.95]	http://www.genome.jp/dbget-bin/www_bget?ath:AT1G17745
evm.TU.scaffold8.159	M16	hypothetical protein	http://www.genome.jp/dbget-bin/www_bget?ath:AT1G13360
evm.TU.scaffold8.189	M16	hypothetical protein	http://www.genome.jp/dbget-bin/www_bget?ath:AT1G12830
evm.TU.scaffold8.20	M16	nucleoside diphosphate kinase; K00940 nucleoside-diphosphate kinase [EC:2.7.4.6]	http://www.genome.jp/dbget-bin/www_bget?ath:AT1G17410
evm.TU.scaffold8.286	M16	SC3; secretory carrier-associated membrane protein 3	http://www.genome.jp/dbget-bin/www_bget?ath:AT1G61250
evm.TU.scaffold8.3	M16	PS2; inorganic pyrophosphatase 1; K13248 pyridoxal phosphate phosphatase PHOSPHO2 [EC:3.1.3.74]	http://www.genome.jp/dbget-bin/www_bget?ath:AT1G73010
evm.TU.scaffold8.33	M16	hypothetical protein	http://www.genome.jp/dbget-bin/www_bget?ath:AT1G17090
evm.TU.scaffold8.45	M16	ACT domain-containing protein	http://www.genome.jp/dbget-bin/www_bget?ath:AT1G16880
evm.TU.scaffold8.56	M16	putative serine/threonine kinase	http://www.genome.jp/dbget-bin/www_bget?ath:AT1G16670
evm.TU.scaffold8.91	M16	hypothetical protein	http://www.genome.jp/dbget-bin/www_bget?ath:AT1G15230
evm.TU.scaffold923.11	M16	2-oxoglutarate-dependent dioxygenase-like protein	http://www.genome.jp/dbget-bin/www_bget?ath:AT1G06650
evm.TU.scaffold923.17	M16	histone H1.2; K11275 histone H1/5	http://www.genome.jp/dbget-bin/www_bget?ath:AT2G30620
evm.TU.scaffold923.39	M16	glycine-rich protein	http://www.genome.jp/dbget-bin/www_bget?ath:AT1G07135
novel.1743	M16	hypothetical protein	http://www.genome.jp/dbget-bin/www_bget?ath:AT1G23790
novel.1925	M16	BED zinc finger and hAT dimerization domain-containing protein	http://www.genome.jp/dbget-bin/www_bget?ath:AT3G42170
novel.3228	M16	--	--
novel.3246	M16	--	--
novel.3691	M16	--	--
evm.TU.scaffold101.36	M17	LGO; cyclin-dependent protein kinase inhibitor SMR1	http://www.genome.jp/dbget-bin/www_bget?ath:AT3G10525
evm.TU.scaffold1164.3	M17	RING/U-box superfamily protein	http://www.genome.jp/dbget-bin/www_bget?ath:AT3G60966
evm.TU.scaffold1198.1	M17	putative beta-1,3-galactosyltransferase 10	http://www.genome.jp/dbget-bin/www_bget?ath:AT4G32120
evm.TU.scaffold136.46	M17	U-box domain-containing protein 5	http://www.genome.jp/dbget-bin/www_bget?ath:AT4G36550
evm.TU.scaffold136.47	M17	U-box domain-containing protein 5	http://www.genome.jp/dbget-bin/www_bget?ath:AT4G36550
evm.TU.scaffold136.5	M17	myb family transcription factor	http://www.genome.jp/dbget-bin/www_bget?ath:AT4G37180
evm.TU.scaffold136.53	M17	TIR-NBS-LRR class disease resistance protein	http://www.genome.jp/dbget-bin/www_bget?ath:AT4G36150
evm.TU.scaffold136.7	M17	cold acclimation protein WCOR413	http://www.genome.jp/dbget-bin/www_bget?ath:AT4G37220
evm.TU.scaffold1397.14	M17	hypothetical protein	http://www.genome.jp/dbget-bin/www_bget?ath:AT4G37290
evm.TU.scaffold1397.28	M17	hypothetical protein	http://www.genome.jp/dbget-bin/www_bget?ath:AT4G37030
evm.TU.scaffold1423.13	M17	BZIP53; basic region/leucine zipper motif 53 protein	http://www.genome.jp/dbget-bin/www_bget?ath:AT3G62420
evm.TU.scaffold1502.4	M17	serine protease inhibitor, Kazal-type family protein	http://www.genome.jp/dbget-bin/www_bget?ath:AT3G61980
evm.TU.scaffold1502.5	M17	S-adenosyl-L-methionine-dependent methyltransferase-like protein	http://www.genome.jp/dbget-bin/www_bget?ath:AT3G62000
evm.TU.scaffold1665.10	M17	MCD1; multiple chloroplast division site 1	http://www.genome.jp/dbget-bin/www_bget?ath:AT1G20830
evm.TU.scaffold1665.9	M17	ribosomal protein L10 family protein; K14815 mRNA turnover protein 4	http://www.genome.jp/dbget-bin/www_bget?ath:AT1G25260
evm.TU.scaffold175.32	M17	--	--
evm.TU.scaffold1859.1	M17	--	--
evm.TU.scaffold1992.1	M17	WSIP2; WUS-interacting protein 2	http://www.genome.jp/dbget-bin/www_bget?ath:AT3G15880
evm.TU.scaffold223.25	M17	NF-YB10; nuclear transcription factor Y subunit B-10	http://www.genome.jp/dbget-bin/www_bget?ath:AT3G53340
evm.TU.scaffold2499.5	M17	XT1; xyloglucan 6-xylosyltransferase; K08238 xyloglucan 6-xylosyltransferase [EC:2.4.2.39]	http://www.genome.jp/dbget-bin/www_bget?ath:AT3G62720
evm.TU.scaffold260.5	M17	small nuclear ribonucleoprotein G; K11099 small nuclear ribonucleoprotein G	http://www.genome.jp/dbget-bin/www_bget?ath:AT3G11500
evm.TU.scaffold2600.1	M17	PBF1; proteasome subunit beta type-1; K02732 20S proteasome subunit beta 6 [EC:3.4.25.1]	http://www.genome.jp/dbget-bin/www_bget?ath:AT3G60820
evm.TU.scaffold2616.12	M17	HTA9; histone H2A protein 9; K11251 histone H2A	http://www.genome.jp/dbget-bin/www_bget?ath:AT1G52740
evm.TU.scaffold2654.11	M17	BAP1; BON association protein 1	http://www.genome.jp/dbget-bin/www_bget?ath:AT3G61190
evm.TU.scaffold2740.1	M17	PBF1; proteasome subunit beta type-1; K02732 20S proteasome subunit beta 6 [EC:3.4.25.1]	http://www.genome.jp/dbget-bin/www_bget?ath:AT3G60820
evm.TU.scaffold2884.3	M17	RAB18; Ras-related protein Rab-18; K07910 Ras-related protein Rab-18	http://www.genome.jp/dbget-bin/www_bget?ath:AT1G43890
evm.TU.scaffold304.12	M17	RLP35; receptor like protein 35	http://www.genome.jp/dbget-bin/www_bget?ath:AT3G11080
evm.TU.scaffold32.110	M17	RNA recognition motif-containing protein; K14785 ESF2/ABP1 family protein	http://www.genome.jp/dbget-bin/www_bget?ath:AT3G56510
evm.TU.scaffold32.131	M17	hypothetical protein	http://www.genome.jp/dbget-bin/www_bget?ath:AT3G56830
evm.TU.scaffold32.51	M17	Haloacid dehalogenase-like hydrolase (HAD) superfamily protein; K15731 carboxy-terminal domain RNA polymerase II polypeptide A small phosphatase [EC:3.1.3.16]	http://www.genome.jp/dbget-bin/www_bget?ath:AT3G55960
evm.TU.scaffold32.98	M17	hypothetical protein	http://www.genome.jp/dbget-bin/www_bget?ath:AT3G56360
evm.TU.scaffold3251.3	M17	RBL14; rhomboid-like protein 14; K09651 rhomboid domain-containing protein 1 [EC:3.4.21.-]	http://www.genome.jp/dbget-bin/www_bget?ath:AT3G17611
evm.TU.scaffold3377.3	M17	thioesterase family protein	http://www.genome.jp/dbget-bin/www_bget?ath:AT3G16175
evm.TU.scaffold347.8	M17	--	--
evm.TU.scaffold347.9	M17	--	--
evm.TU.scaffold3472.8	M17	tetratricopeptide repeat domain-containing protein	http://www.genome.jp/dbget-bin/www_bget?ath:AT3G16760
evm.TU.scaffold3472.9	M17	EBP; ethylene-responsive transcription factor RAP2-3; K09286 EREBP-like factor	http://www.genome.jp/dbget-bin/www_bget?ath:AT3G16770
evm.TU.scaffold422.1	M17	RPL3P; 50S ribosomal protein L3-2; K02906 large subunit ribosomal protein L3	http://www.genome.jp/dbget-bin/www_bget?ath:AT3G17465
evm.TU.scaffold422.24	M17	putative pectinesterase inhibitor	http://www.genome.jp/dbget-bin/www_bget?ath:AT3G17152
evm.TU.scaffold422.25	M17	nucleic acid-binding, OB-fold-like protein; K07466 replication factor A1	http://www.genome.jp/dbget-bin/www_bget?ath:AT1G52950
evm.TU.scaffold422.32	M17	pollen Ole e 1 allergen and extensin family protein	http://www.genome.jp/dbget-bin/www_bget?ath:AT3G16660
evm.TU.scaffold422.40	M17	Adenine nucleotide alpha hydrolases-like superfamily protein	http://www.genome.jp/dbget-bin/www_bget?ath:AT3G17020
evm.TU.scaffold422.41	M17	UBC32; ubiquitin-conjugating enzyme E2 32; K10578 ubiquitin-conjugating enzyme E2 J1 [EC:6.3.2.19]	http://www.genome.jp/dbget-bin/www_bget?ath:AT3G17000
evm.TU.scaffold422.48	M17	COBL8; COBRA-like protein 8	http://www.genome.jp/dbget-bin/www_bget?ath:AT3G16860
evm.TU.scaffold422.52	M17	putative protein phosphatase 2C	http://www.genome.jp/dbget-bin/www_bget?ath:AT3G05640
evm.TU.scaffold4223.2	M17	putative eukaryotic LigT protein	http://www.genome.jp/dbget-bin/www_bget?ath:AT3G16220
evm.TU.scaffold4359.2	M17	KINESIN-13A; kinesin 13A; K10393 kinesin family member 2/24	http://www.genome.jp/dbget-bin/www_bget?ath:AT3G16630
evm.TU.scaffold4359.3	M17	TCTP; translationally-controlled tumor protein-like protein	http://www.genome.jp/dbget-bin/www_bget?ath:AT3G16640
evm.TU.scaffold439.10	M17	hypothetical protein	http://www.genome.jp/dbget-bin/www_bget?ath:AT5G14730
evm.TU.scaffold439.25	M17	hypothetical protein	http://www.genome.jp/dbget-bin/www_bget?ath:AT1G36622
evm.TU.scaffold439.33	M17	GTB1; transcription elongation factor SPT6-like protein; K11292 transcription elongation factor SPT6	http://www.genome.jp/dbget-bin/www_bget?ath:AT1G65440
evm.TU.scaffold449.33	M17	CAMBP25; calmodulin binding protein 25	http://www.genome.jp/dbget-bin/www_bget?ath:AT2G41010
evm.TU.scaffold48.110	M17	ACT7; actin 7; K10355 actin, other eukaryote	http://www.genome.jp/dbget-bin/www_bget?ath:AT5G09810
evm.TU.scaffold48.111	M17	EDM2; enhanced downy mildew 2	http://www.genome.jp/dbget-bin/www_bget?ath:AT5G55390
evm.TU.scaffold48.112	M17	hypothetical protein	http://www.genome.jp/dbget-bin/www_bget?ath:AT2G35260
evm.TU.scaffold553.19	M17	Exostosin family protein	http://www.genome.jp/dbget-bin/www_bget?ath:AT4G38040
evm.TU.scaffold66.22	M17	hypothetical protein	http://www.genome.jp/dbget-bin/www_bget?ath:AT2G42975
evm.TU.scaffold66.74	M17	hypothetical protein	http://www.genome.jp/dbget-bin/www_bget?ath:AT2G42040
evm.TU.scaffold66.97	M17	P-loop containing nucleoside triphosphate hydrolases superfamily protein	http://www.genome.jp/dbget-bin/www_bget?ath:AT4G27680
evm.TU.scaffold67.36	M17	hypothetical protein	http://www.genome.jp/dbget-bin/www_bget?ath:AT3G01860
evm.TU.scaffold73.141	M17	MAT3; S-adenosylmethionine synthase 3; K00789 S-adenosylmethionine synthetase [EC:2.5.1.6]	http://www.genome.jp/dbget-bin/www_bget?ath:AT2G36880
evm.TU.scaffold73.144	M17	MEMB12; membrin 12; K08496 golgi SNAP receptor complex member 2	http://www.genome.jp/dbget-bin/www_bget?ath:AT5G50440
evm.TU.scaffold73.184	M17	hypothetical protein	http://www.genome.jp/dbget-bin/www_bget?ath:AT2G37480
evm.TU.scaffold73.191	M17	histone H4; K11254 histone H4	http://www.genome.jp/dbget-bin/www_bget?ath:AT3G53730
evm.TU.scaffold73.208	M17	protease inhibitor/seed storage/lipid transfer protein (LTP) family protein	http://www.genome.jp/dbget-bin/www_bget?ath:AT2G37870
evm.TU.scaffold73.216	M17	hypothetical protein	http://www.genome.jp/dbget-bin/www_bget?ath:AT2G20620
evm.TU.scaffold73.251	M17	hypothetical protein	http://www.genome.jp/dbget-bin/www_bget?ath:AT2G38465
evm.TU.scaffold794.26	M17	PYD1; putative dihydropyrimidine dehydrogenase; K00207 dihydropyrimidine dehydrogenase (NADP+) [EC:1.3.1.2]	http://www.genome.jp/dbget-bin/www_bget?ath:AT3G17810
evm.TU.scaffold794.28	M17	B-cell receptor-associated 31-like protein	http://www.genome.jp/dbget-bin/www_bget?ath:AT1G48440
evm.TU.scaffold794.38	M17	AGD15; putative ADP-ribosylation factor GTPase-activating protein AGD15; K12486 stromal membrane-associated protein	http://www.genome.jp/dbget-bin/www_bget?ath:AT3G17660
evm.TU.scaffold794.39	M17	YSL5; putative metal-nicotianamine transporter YSL5	http://www.genome.jp/dbget-bin/www_bget?ath:AT3G17650
evm.TU.scaffold868.2	M17	MCD1; multiple chloroplast division site 1	http://www.genome.jp/dbget-bin/www_bget?ath:AT1G20830
evm.TU.scaffold8808.1	M17	hypothetical protein	http://www.genome.jp/dbget-bin/www_bget?ath:AT1G52857
evm.TU.scaffold906.1	M17	NAC2; NAC domain containing protein 2	http://www.genome.jp/dbget-bin/www_bget?ath:AT3G15510
evm.TU.scaffold906.2	M17	NAC3; ATAF-like NAC-domain transcription factor	http://www.genome.jp/dbget-bin/www_bget?ath:AT3G15500
evm.TU.scaffold906.4	M17	ribosomal RNA processing brix domain-containing protein; K14820 ribosome biogenesis protein BRX1	http://www.genome.jp/dbget-bin/www_bget?ath:AT3G15460
evm.TU.scaffold91.29	M17	pectin lyase-like superfamily protein; K01728 pectate lyase [EC:4.2.2.2]	http://www.genome.jp/dbget-bin/www_bget?ath:AT3G09540
evm.TU.scaffold93.25	M17	DTX35; detoxifying efflux carrier 35; K03327 multidrug resistance protein, MATE family	http://www.genome.jp/dbget-bin/www_bget?ath:AT4G25640
evm.TU.scaffold93.41	M17	--	--
evm.TU.scaffold93.52	M17	GYRA; DNA gyrase subunit A; K02469 DNA gyrase subunit A [EC:5.99.1.3]	http://www.genome.jp/dbget-bin/www_bget?ath:AT3G10690
evm.TU.scaffold93.53	M17	DNAJ heat shock N-terminal domain-containing protein	http://www.genome.jp/dbget-bin/www_bget?ath:AT2G25560
evm.TU.scaffold933.19	M17	Bifunctional inhibitor/lipid-transfer protein/seed storage 2S albumin superfamily protein	http://www.genome.jp/dbget-bin/www_bget?ath:AT3G18280
novel.1579	M17	--	--
novel.1917	M17	phototropic-responsive NPH3 family protein	http://www.genome.jp/dbget-bin/www_bget?ath:AT3G49900
novel.2395	M17	F-box/RNI-like/FBD-like domain-containing protein	http://www.genome.jp/dbget-bin/www_bget?ath:AT3G52680
novel.2738	M17	RCAR1; regulatory component of ABA receptor 1; K14496 abscisic acid receptor PYR/PYL family	http://www.genome.jp/dbget-bin/www_bget?ath:AT1G01360
novel.2746	M17	--	--
novel.2794	M17	--	--
novel.2840	M17	TIR-NBS-LRR class disease resistance protein	http://www.genome.jp/dbget-bin/www_bget?ath:AT5G41540
novel.570	M17	--	--
novel.907	M17	F-box/kelch-repeat protein	http://www.genome.jp/dbget-bin/www_bget?ath:AT3G16740
novel.929	M17	protein-protein interaction regulator family protein; K13114 pinin	http://www.genome.jp/dbget-bin/www_bget?ath:AT1G15200
evm.TU.scaffold1.78	M18	Cox19-like CHCH family protein	http://www.genome.jp/dbget-bin/www_bget?ath:AT5G09570
evm.TU.scaffold1041.12	M18	plant invertase/pectin methylesterase inhibitor domain-containing protein	http://www.genome.jp/dbget-bin/www_bget?ath:AT3G36659
evm.TU.scaffold127.17	M18	probable fructokinase-4; K00847 fructokinase [EC:2.7.1.4]	http://www.genome.jp/dbget-bin/www_bget?ath:AT3G59480
evm.TU.scaffold1316.13	M18	Optic atrophy 3 protein (OPA3)	http://www.genome.jp/dbget-bin/www_bget?ath:AT3G58150
evm.TU.scaffold1329.21	M18	late embryogenesis abundant hydroxyproline-rich glycoprotein	http://www.genome.jp/dbget-bin/www_bget?ath:AT2G46150
evm.TU.scaffold1461.25	M18	hypothetical protein	http://www.genome.jp/dbget-bin/www_bget?ath:AT5G65207
evm.TU.scaffold1485.11	M18	RAB GDP-dissociation inhibitor; K17255 Rab GDP dissociation inhibitor	http://www.genome.jp/dbget-bin/www_bget?ath:AT5G09550
evm.TU.scaffold15.134	M18	pentatricopeptide repeat-containing protein	http://www.genome.jp/dbget-bin/www_bget?ath:AT1G28020
evm.TU.scaffold1528.12	M18	MO1; monooxygenase 1	http://www.genome.jp/dbget-bin/www_bget?ath:AT4G15760
evm.TU.scaffold16.207	M18	hypothetical protein	http://www.genome.jp/dbget-bin/www_bget?ath:AT5G13210
evm.TU.scaffold1654.3	M18	heat shock protein 23.5; K13993 HSP20 family protein	http://www.genome.jp/dbget-bin/www_bget?ath:AT5G51440
evm.TU.scaffold178.64	M18	BIGYIN; protein BIGYIN1; K17969 mitochondrial fission 1 protein	http://www.genome.jp/dbget-bin/www_bget?ath:AT3G57090
evm.TU.scaffold179.11	M18	SPFH/Band 7/PHB domain-containing membrane-associated protein	http://www.genome.jp/dbget-bin/www_bget?ath:AT4G27585
evm.TU.scaffold1836.7	M18	scarecrow-like protein 30	http://www.genome.jp/dbget-bin/www_bget?ath:AT3G46600
evm.TU.scaffold1836.8	M18	scarecrow-like protein 30	http://www.genome.jp/dbget-bin/www_bget?ath:AT3G46600
evm.TU.scaffold2.170	M18	hypothetical protein	http://www.genome.jp/dbget-bin/www_bget?ath:AT4G37290
evm.TU.scaffold206.33	M18	uncharacterized oxidative stress response protein	http://www.genome.jp/dbget-bin/www_bget?ath:AT2G21640
evm.TU.scaffold21.157	M18	Syntaxin/t-SNARE family protein	http://www.genome.jp/dbget-bin/www_bget?ath:AT1G27700
evm.TU.scaffold217.84	M18	NAC13; NAC domain protein 13	http://www.genome.jp/dbget-bin/www_bget?ath:AT1G32870
evm.TU.scaffold2247.3	M18	CNI1; E3 ubiquitin-protein ligase ATL31; K10664 E3 ubiquitin-protein ligase ATL6/9/15/31/42/55 [EC:6.3.2.19]	http://www.genome.jp/dbget-bin/www_bget?ath:AT5G27420
evm.TU.scaffold2263.1	M18	hypothetical protein	http://www.genome.jp/dbget-bin/www_bget?ath:AT2G41730
evm.TU.scaffold2522.5	M18	core-2/I-branching beta-1,6-N-acetylglucosaminyltransferase family protein	http://www.genome.jp/dbget-bin/www_bget?ath:AT2G37585
evm.TU.scaffold254.29	M18	GSTU10; glutathione S-transferase TAU 10; K00799 glutathione S-transferase [EC:2.5.1.18]	http://www.genome.jp/dbget-bin/www_bget?ath:AT1G74590
evm.TU.scaffold254.31	M18	GSTU10; glutathione S-transferase TAU 10; K00799 glutathione S-transferase [EC:2.5.1.18]	http://www.genome.jp/dbget-bin/www_bget?ath:AT1G74590
evm.TU.scaffold27.76	M18	TIM17-1; translocase inner membrane subunit 17-1; K17795 mitochondrial import inner membrane translocase subunit TIM17	http://www.genome.jp/dbget-bin/www_bget?ath:AT1G20350
evm.TU.scaffold277.75	M18	ESL1; sugar transporter ERD6-like 3	http://www.genome.jp/dbget-bin/www_bget?ath:AT1G08920
evm.TU.scaffold2874.3	M18	ABCB4; auxin efflux transmembrane transporter MDR4; K05658 ATP-binding cassette, subfamily B (MDR/TAP), member 1 [EC:3.6.3.44]	http://www.genome.jp/dbget-bin/www_bget?ath:AT2G47000
evm.TU.scaffold2883.4	M18	hypothetical protein	http://www.genome.jp/dbget-bin/www_bget?ath:AT2G41730
evm.TU.scaffold289.6	M18	hypothetical protein	http://www.genome.jp/dbget-bin/www_bget?ath:AT4G37030
evm.TU.scaffold29.26	M18	WNK4; putative serine/threonine-protein kinase WNK4; K08867 WNK lysine deficient protein kinase [EC:2.7.11.1]	http://www.genome.jp/dbget-bin/www_bget?ath:AT5G58350
evm.TU.scaffold29.60	M18	hypothetical protein	http://www.genome.jp/dbget-bin/www_bget?ath:AT5G57910
evm.TU.scaffold3.100	M18	rpl16; ribosomal protein L16; K02878 large subunit ribosomal protein L16	http://www.genome.jp/dbget-bin/www_bget?ath:ArthCp060
evm.TU.scaffold318.16	M18	SPFH/Band 7/PHB domain-containing membrane-associated protein	http://www.genome.jp/dbget-bin/www_bget?ath:AT4G27585
evm.TU.scaffold325.35	M18	uncharacterized oxidative stress response protein	http://www.genome.jp/dbget-bin/www_bget?ath:AT2G21640
evm.TU.scaffold3286.3	M18	hypothetical protein	http://www.genome.jp/dbget-bin/www_bget?ath:AT1G05060
evm.TU.scaffold383.47	M18	UGT73C1; UDP-glucosyl transferase 73C1; K13496 UDP-glucosyl transferase 73C [EC:2.4.1.-]	http://www.genome.jp/dbget-bin/www_bget?ath:AT2G36750
evm.TU.scaffold4.32	M18	hypothetical protein	http://www.genome.jp/dbget-bin/www_bget?ath:AT1G70420
evm.TU.scaffold453.1	M18	core-2/I-branching beta-1,6-N-acetylglucosaminyltransferase family protein	http://www.genome.jp/dbget-bin/www_bget?ath:AT1G10880
evm.TU.scaffold468.13	M18	SOT12; sulphotransferase 12	http://www.genome.jp/dbget-bin/www_bget?ath:AT2G03760
evm.TU.scaffold48.131	M18	hypothetical protein	http://www.genome.jp/dbget-bin/www_bget?ath:AT2G38823
evm.TU.scaffold505.21	M18	AOX1A; alternative oxidase 1A; K17893 ubiquinol oxidase [EC:1.10.3.11]	http://www.genome.jp/dbget-bin/www_bget?ath:AT3G22370
evm.TU.scaffold51.80	M18	Acyl-CoA N-acyltransferases (NAT) superfamily protein	http://www.genome.jp/dbget-bin/www_bget?ath:AT2G32020
evm.TU.scaffold514.103	M18	SIP1;2; putative aquaporin SIP1-2; K09875 aquaporin SIP	http://www.genome.jp/dbget-bin/www_bget?ath:AT5G18290
evm.TU.scaffold514.3	M18	--	--
evm.TU.scaffold516.6	M18	SOT12; sulphotransferase 12	http://www.genome.jp/dbget-bin/www_bget?ath:AT2G03760
evm.TU.scaffold523.17	M18	MRP3; ABC transporter C family member 3	http://www.genome.jp/dbget-bin/www_bget?ath:AT3G13080
evm.TU.scaffold53.29	M18	RING/U-box domain-containing protein	http://www.genome.jp/dbget-bin/www_bget?ath:AT1G24440
evm.TU.scaffold53.30	M18	HXXXD-type acyl-transferase-like protein	http://www.genome.jp/dbget-bin/www_bget?ath:AT1G24420
evm.TU.scaffold54.19	M18	PDC2; pyruvate decarboxylase-2; K01568 pyruvate decarboxylase [EC:4.1.1.1]	http://www.genome.jp/dbget-bin/www_bget?ath:AT5G54960
evm.TU.scaffold55.11	M18	peroxidase 7; K00430 peroxidase [EC:1.11.1.7]	http://www.genome.jp/dbget-bin/www_bget?ath:AT1G30870
evm.TU.scaffold56.188	M18	putative glutamine amidotransferase	http://www.genome.jp/dbget-bin/www_bget?ath:AT1G15040
evm.TU.scaffold56.75	M18	RING/U-box domain-containing protein	http://www.genome.jp/dbget-bin/www_bget?ath:AT1G13195
evm.TU.scaffold57.137	M18	--	--
evm.TU.scaffold57.22	M18	--	--
evm.TU.scaffold573.4	M18	TX1; MATE efflux family protein DTX1; K03327 multidrug resistance protein, MATE family	http://www.genome.jp/dbget-bin/www_bget?ath:AT2G04040
evm.TU.scaffold59.92	M18	SOT12; sulphotransferase 12	http://www.genome.jp/dbget-bin/www_bget?ath:AT2G03760
evm.TU.scaffold60.83	M18	probable aldo-keto reductase 1	http://www.genome.jp/dbget-bin/www_bget?ath:AT1G10810
evm.TU.scaffold621.5	M18	hypothetical protein	http://www.genome.jp/dbget-bin/www_bget?ath:AT5G54550
evm.TU.scaffold621.6	M18	hypothetical protein	http://www.genome.jp/dbget-bin/www_bget?ath:AT5G52930
evm.TU.scaffold628.10	M18	hypothetical protein	http://www.genome.jp/dbget-bin/www_bget?ath:AT4G33666
evm.TU.scaffold642.1	M18	P-loop containing nucleoside triphosphate hydrolases superfamily protein	http://www.genome.jp/dbget-bin/www_bget?ath:AT2G18193
evm.TU.scaffold712.2	M18	hypothetical protein	http://www.genome.jp/dbget-bin/www_bget?ath:AT2G41730
evm.TU.scaffold726.33	M18	hypothetical protein	http://www.genome.jp/dbget-bin/www_bget?ath:AT3G45730
evm.TU.scaffold73.120	M18	hypothetical protein	http://www.genome.jp/dbget-bin/www_bget?ath:AT2G36440
evm.TU.scaffold73.133	M18	UGT73C2; UDP-glucosyl transferase 73C2; K13496 UDP-glucosyl transferase 73C [EC:2.4.1.-]	http://www.genome.jp/dbget-bin/www_bget?ath:AT2G36760
evm.TU.scaffold736.29	M18	--	--
evm.TU.scaffold736.30	M18	hypothetical protein	http://www.genome.jp/dbget-bin/www_bget?ath:AT5G24040
evm.TU.scaffold767.2	M18	hypothetical protein	http://www.genome.jp/dbget-bin/www_bget?ath:AT2G41730
evm.TU.scaffold8.284	M18	BFN1; endonuclease 1	http://www.genome.jp/dbget-bin/www_bget?ath:AT1G11190
evm.TU.scaffold8127.1	M18	UGT73C1; UDP-glucosyl transferase 73C1; K13496 UDP-glucosyl transferase 73C [EC:2.4.1.-]	http://www.genome.jp/dbget-bin/www_bget?ath:AT2G36750
evm.TU.scaffold831.12	M18	DOGT1; UDP-glycosyltransferase 73C5; K13496 UDP-glucosyl transferase 73C [EC:2.4.1.-]	http://www.genome.jp/dbget-bin/www_bget?ath:AT2G36800
evm.TU.scaffold91.68	M18	yippee family putative zinc-binding protein	http://www.genome.jp/dbget-bin/www_bget?ath:AT3G08990
evm.TU.scaffold951.11	M18	hypothetical protein	http://www.genome.jp/dbget-bin/www_bget?ath:AT1G31335
evm.TU.scaffold994.44	M18	--	--
novel.1867	M18	GAE5; UDP-D-glucuronate 4-epimerase 5; K08679 UDP-glucuronate 4-epimerase [EC:5.1.3.6]	http://www.genome.jp/dbget-bin/www_bget?ath:AT4G12250
novel.2591	M18	--	--
novel.2866	M18	--	--
novel.2944	M18	--	--
novel.3551	M18	--	--
evm.TU.scaffold1023.8	M19	EXLB1; expansin-like B1	http://www.genome.jp/dbget-bin/www_bget?ath:AT4G17030
evm.TU.scaffold1037.10	M19	ACS7; 1-aminocyclopropane-1-carboxylate synthase 7; K01762 1-aminocyclopropane-1-carboxylate synthase [EC:4.4.1.14]	http://www.genome.jp/dbget-bin/www_bget?ath:AT4G26200
evm.TU.scaffold1037.6	M19	MEK1; mitogen-activated protein kinase kinase 1; K04368 mitogen-activated protein kinase kinase 1 [EC:2.7.12.2]	http://www.genome.jp/dbget-bin/www_bget?ath:AT4G26070
evm.TU.scaffold125.65	M19	HSFA7A; heat stress transcription factor A-7a; K09419 heat shock transcription factor, other eukaryote	http://www.genome.jp/dbget-bin/www_bget?ath:AT3G51910
evm.TU.scaffold135.57	M19	glycoside hydrolase family 28 protein / polygalacturonase (pectinase) family protein	http://www.genome.jp/dbget-bin/www_bget?ath:AT4G23820
evm.TU.scaffold135.67	M19	F-box protein	http://www.genome.jp/dbget-bin/www_bget?ath:AT1G33530
evm.TU.scaffold1486.4	M19	pentatricopeptide repeat-containing protein	http://www.genome.jp/dbget-bin/www_bget?ath:AT4G08210
evm.TU.scaffold1528.7	M19	RALFL33; protein ralf-like 33	http://www.genome.jp/dbget-bin/www_bget?ath:AT4G15800
evm.TU.scaffold1705.2	M19	PSBO1; PS II oxygen-evolving complex 1; K02716 photosystem II oxygen-evolving enhancer protein 1	http://www.genome.jp/dbget-bin/www_bget?ath:AT5G66570
evm.TU.scaffold1705.7	M19	DAR5; DA1-related protein 5	http://www.genome.jp/dbget-bin/www_bget?ath:AT5G66630
evm.TU.scaffold1731.10	M19	BGL2; beta 1,3-glucanase 2	http://www.genome.jp/dbget-bin/www_bget?ath:AT3G57260
evm.TU.scaffold1779.17	M19	hypothetical protein	http://www.genome.jp/dbget-bin/www_bget?ath:AT5G67210
evm.TU.scaffold1782.8	M19	MAPKKK19; mitogen-activated protein kinase kinase kinase 19	http://www.genome.jp/dbget-bin/www_bget?ath:AT5G67080
evm.TU.scaffold180.28	M19	ATPase, V0 complex, subunit E; K02153 V-type H+-transporting ATPase subunit e	http://www.genome.jp/dbget-bin/www_bget?ath:AT4G26710
evm.TU.scaffold180.46	M19	putative beta-1,3-galactosyltransferase 4	http://www.genome.jp/dbget-bin/www_bget?ath:AT4G26940
evm.TU.scaffold180.52	M19	Kua-ubiquitin conjugating enzyme hybrid localisation domain-containing protein; K10704 ubiquitin-conjugating enzyme E2 variant	http://www.genome.jp/dbget-bin/www_bget?ath:AT2G22890
evm.TU.scaffold180.56	M19	60S ribosomal protein L14-2; K02875 large subunit ribosomal protein L14e	http://www.genome.jp/dbget-bin/www_bget?ath:AT4G27090
evm.TU.scaffold1843.7	M19	--	--
evm.TU.scaffold1843.8	M19	hypothetical protein	http://www.genome.jp/dbget-bin/www_bget?ath:AT4G28085
evm.TU.scaffold1873.5	M19	PROT2; proline transporter 2	http://www.genome.jp/dbget-bin/www_bget?ath:AT3G55740
evm.TU.scaffold2057.19	M19	hypothetical protein	http://www.genome.jp/dbget-bin/www_bget?ath:AT4G27657
evm.TU.scaffold2057.22	M19	hypothetical protein	http://www.genome.jp/dbget-bin/www_bget?ath:AT4G27657
evm.TU.scaffold2106.2	M19	MPK6; MAP kinase 6; K14512 mitogen-activated protein kinase 6 [EC:2.7.11.24]	http://www.genome.jp/dbget-bin/www_bget?ath:AT2G43790
evm.TU.scaffold213.33	M19	putative aldose 1-epimerase; K01785 aldose 1-epimerase [EC:5.1.3.3]	http://www.genome.jp/dbget-bin/www_bget?ath:AT3G47800
evm.TU.scaffold213.41	M19	putative DNAJ heat shock protein; K09510 DnaJ homolog subfamily B member 4	http://www.genome.jp/dbget-bin/www_bget?ath:AT3G47940
evm.TU.scaffold2144.3	M19	hypothetical protein	http://www.genome.jp/dbget-bin/www_bget?ath:AT3G56250
evm.TU.scaffold225.14	M19	60S ribosomal protein L29-1; K02905 large subunit ribosomal protein L29e	http://www.genome.jp/dbget-bin/www_bget?ath:AT3G06700
evm.TU.scaffold225.5	M19	hypothetical protein	http://www.genome.jp/dbget-bin/www_bget?ath:AT3G06868
evm.TU.scaffold2329.1	M19	FLC; MADS-box protein FLOWERING LOCUS C	http://www.genome.jp/dbget-bin/www_bget?ath:AT5G10140
evm.TU.scaffold258.137	M19	TIR-NBS-LRR class disease resistance protein	http://www.genome.jp/dbget-bin/www_bget?ath:AT5G22690
evm.TU.scaffold258.142	M19	--	--
evm.TU.scaffold258.145	M19	--	--
evm.TU.scaffold258.157	M19	Gibberellin-regulated family protein	http://www.genome.jp/dbget-bin/www_bget?ath:AT3G10185
evm.TU.scaffold258.80	M19	UBC11; ubiquitin-conjugating enzyme 11; K06689 ubiquitin-conjugating enzyme E2 D/E [EC:6.3.2.19]	http://www.genome.jp/dbget-bin/www_bget?ath:AT3G08690
evm.TU.scaffold258.88_evm.TU.scaffold258.89	M19	hypothetical protein	http://www.genome.jp/dbget-bin/www_bget?ath:AT3G08880
evm.TU.scaffold258.98	M19	hypothetical protein	http://www.genome.jp/dbget-bin/www_bget?ath:AT3G09050
evm.TU.scaffold260.25	M19	polynucleotidyl transferase, ribonuclease H-like superfamily protein	http://www.genome.jp/dbget-bin/www_bget?ath:AT3G11770
evm.TU.scaffold304.5	M19	hypothetical protein	http://www.genome.jp/dbget-bin/www_bget?ath:AT5G05300
evm.TU.scaffold362.21	M19	putative 3-methyladenine glycosylase I; K01246 DNA-3-methyladenine glycosylase I [EC:3.2.2.20]	http://www.genome.jp/dbget-bin/www_bget?ath:AT3G12710
evm.TU.scaffold367.41	M19	hypothetical protein	http://www.genome.jp/dbget-bin/www_bget?ath:AT2G31335
evm.TU.scaffold369.10	M19	RPL16A; 60S ribosomal protein L16A; K02868 large subunit ribosomal protein L11e	http://www.genome.jp/dbget-bin/www_bget?ath:AT2G42740
evm.TU.scaffold40.115	M19	hypothetical protein	http://www.genome.jp/dbget-bin/www_bget?ath:AT4G24275
evm.TU.scaffold400.10	M19	BT4; BTB and TAZ domain protein 4	http://www.genome.jp/dbget-bin/www_bget?ath:AT5G67480
evm.TU.scaffold400.11	M19	hypothetical protein	http://www.genome.jp/dbget-bin/www_bget?ath:AT5G67490
evm.TU.scaffold400.13	M19	APK4; adenosine-5'-phosphosulfate kinase 4; K00860 adenylylsulfate kinase [EC:2.7.1.25]	http://www.genome.jp/dbget-bin/www_bget?ath:AT5G67520
evm.TU.scaffold468.1	M19	hypothetical protein; K13151 snurportin-1	http://www.genome.jp/dbget-bin/www_bget?ath:AT4G24880
evm.TU.scaffold60.157	M19	GolS3; galactinol synthase 3; K18819 inositol 3-alpha-galactosyltransferase [EC:2.4.1.123]	http://www.genome.jp/dbget-bin/www_bget?ath:AT1G09350
evm.TU.scaffold623.14	M19	Oxoglutarate/iron-dependent oxygenase; K00472 prolyl 4-hydroxylase [EC:1.14.11.2]	http://www.genome.jp/dbget-bin/www_bget?ath:AT4G25600
evm.TU.scaffold623.15	M19	C2H2-like zinc finger protein	http://www.genome.jp/dbget-bin/www_bget?ath:AT4G25610
evm.TU.scaffold793.4	M19	ATCES1; acyl-CoA independent ceramide synthase; K04711 dihydroceramidase [EC:3.5.1.-]	http://www.genome.jp/dbget-bin/www_bget?ath:AT4G22330
evm.TU.scaffold816.22	M19	VPS2.1; vacuolar protein sorting-associated protein 2-1; K12191 charged multivesicular body protein 2A	http://www.genome.jp/dbget-bin/www_bget?ath:AT2G06530
evm.TU.scaffold816.3	M19	Cytochrome b-c1 complex, subunit 8 protein	http://www.genome.jp/dbget-bin/www_bget?ath:AT3G10860
evm.TU.scaffold816.33	M19	NAC053; NAC domain containing protein 53	http://www.genome.jp/dbget-bin/www_bget?ath:AT3G10500
evm.TU.scaffold885.13	M19	putative defensin-like protein 203	http://www.genome.jp/dbget-bin/www_bget?ath:AT2G36255
evm.TU.scaffold885.44	M19	SK13; SKP1-like protein 13; K03094 S-phase kinase-associated protein 1	http://www.genome.jp/dbget-bin/www_bget?ath:AT3G60010
evm.TU.scaffold885.56	M19	DIN2; beta-glucosidase 30; K01188 beta-glucosidase [EC:3.2.1.21]	http://www.genome.jp/dbget-bin/www_bget?ath:AT3G60140
evm.TU.scaffold943.13	M19	ATP-PRT2; ATP phosphoribosyl transferase 2; K00765 ATP phosphoribosyltransferase [EC:2.4.2.17]	http://www.genome.jp/dbget-bin/www_bget?ath:AT1G09795
novel.1119	M19	--	--
novel.1154	M19	--	--
novel.1836	M19	FMN-linked oxidoreductases superfamily protein; K05539 tRNA-dihydrouridine synthase A [EC:1.-.-.-]	http://www.genome.jp/dbget-bin/www_bget?ath:AT3G63510
novel.2430	M19	RING/U-box domain-containing protein	http://www.genome.jp/dbget-bin/www_bget?ath:AT4G19670
novel.2575	M19	NB-ARC domain-containing disease resistance protein	http://www.genome.jp/dbget-bin/www_bget?ath:AT1G50180
novel.2601	M19	serine/threonine-protein phosphatase 7 inactive-like protein; K04460 serine/threonine-protein phosphatase 5 [EC:3.1.3.16]	http://www.genome.jp/dbget-bin/www_bget?ath:AT5G10900
novel.288	M19	UGT85A3; UDP-glucosyl transferase 85A3	http://www.genome.jp/dbget-bin/www_bget?ath:AT1G22380
novel.289	M19	BolA-like protein	http://www.genome.jp/dbget-bin/www_bget?ath:AT5G17560
novel.3291	M19	--	--
novel.3587	M19	--	--
novel.3734	M19	--	--
novel.3787	M19	--	--
novel.3795	M19	--	--
novel.3990	M19	--	--
novel.4020	M19	--	--
novel.424	M19	CLT1; CRT (chloroquine-resistance transporter)-like transporter 1	http://www.genome.jp/dbget-bin/www_bget?ath:AT5G19380
novel.458	M19	--	--
evm.TU.scaffold1.170	M2	aspartyl protease family protein	http://www.genome.jp/dbget-bin/www_bget?ath:AT5G10770
evm.TU.scaffold1.9	M2	hypothetical protein	http://www.genome.jp/dbget-bin/www_bget?ath:AT5G08240
evm.TU.scaffold10.143	M2	HSP20 family protein; K13993 HSP20 family protein	http://www.genome.jp/dbget-bin/www_bget?ath:AT2G29500
evm.TU.scaffold10.150	M2	tropinone reductase-like protein; K08081 Tropinone reductase 1 [EC:1.1.1.206]	http://www.genome.jp/dbget-bin/www_bget?ath:AT2G29150
evm.TU.scaffold10.153	M2	tropinone reductase-like protein; K08081 Tropinone reductase 1 [EC:1.1.1.206]	http://www.genome.jp/dbget-bin/www_bget?ath:AT2G29320
evm.TU.scaffold10.178	M2	EXPA6; expansin A6	http://www.genome.jp/dbget-bin/www_bget?ath:AT2G28950
evm.TU.scaffold10.47	M2	putative serine/threonine kinase	http://www.genome.jp/dbget-bin/www_bget?ath:AT2G31010
evm.TU.scaffold10.93	M2	C4H; trans-cinnamate 4-monooxygenase; K00487 trans-cinnamate 4-monooxygenase [EC:1.14.13.11]	http://www.genome.jp/dbget-bin/www_bget?ath:AT2G30490
evm.TU.scaffold10.94	M2	C4H; trans-cinnamate 4-monooxygenase; K00487 trans-cinnamate 4-monooxygenase [EC:1.14.13.11]	http://www.genome.jp/dbget-bin/www_bget?ath:AT2G30490
evm.TU.scaffold1004.30	M2	--	--
evm.TU.scaffold1022.1	M2	Patched family protein; K12385 Niemann-Pick C1 protein	http://www.genome.jp/dbget-bin/www_bget?ath:AT1G42470
evm.TU.scaffold1022.5	M2	CPN60A; chaperonin-60 alpha	http://www.genome.jp/dbget-bin/www_bget?ath:AT2G28000
evm.TU.scaffold1023.7	M2	--	--
evm.TU.scaffold1030.9	M2	cold acclimation protein WCOR413	http://www.genome.jp/dbget-bin/www_bget?ath:AT4G37220
evm.TU.scaffold1031.23	M2	WOX13; WUSCHEL-related homeobox 13	http://www.genome.jp/dbget-bin/www_bget?ath:AT4G35550
evm.TU.scaffold1038.11	M2	PIP1;4; plasma membrane intrinsic protein 1;4; K09872 aquaporin PIP	http://www.genome.jp/dbget-bin/www_bget?ath:AT4G00430
evm.TU.scaffold1048.20	M2	EXPA5; expansin A5	http://www.genome.jp/dbget-bin/www_bget?ath:AT3G29030
evm.TU.scaffold1049.16	M2	CRD1; magnesium-protoporphyrin IX monomethyl ester [oxidative] cyclase; K04035 magnesium-protoporphyrin IX monomethyl ester (oxidative) cyclase [EC:1.14.13.81]	http://www.genome.jp/dbget-bin/www_bget?ath:AT3G56940
evm.TU.scaffold105.13	M2	germination-related protein	http://www.genome.jp/dbget-bin/www_bget?ath:AT3G08030
evm.TU.scaffold105.66	M2	AIR12; auxin-induced in root cultures protein 12	http://www.genome.jp/dbget-bin/www_bget?ath:AT3G07390
evm.TU.scaffold1053.6	M2	AHP4; histidine-containing phosphotransfer protein 4; K14490 histidine-containing phosphotransfer peotein	http://www.genome.jp/dbget-bin/www_bget?ath:AT3G16360
evm.TU.scaffold106.111	M2	ERF4; ethylene-responsive transcription factor 4; K09286 EREBP-like factor	http://www.genome.jp/dbget-bin/www_bget?ath:AT3G15210
evm.TU.scaffold106.124	M2	legume lectin-like protein	http://www.genome.jp/dbget-bin/www_bget?ath:AT3G16530
evm.TU.scaffold106.135	M2	plasma-membrane choline transporter family protein	http://www.genome.jp/dbget-bin/www_bget?ath:AT3G15380
evm.TU.scaffold106.30	M2	chaperone DnaJ-domain containing protein	http://www.genome.jp/dbget-bin/www_bget?ath:AT3G14200
evm.TU.scaffold106.33	M2	GLIP4; GDSL esterase/lipase 4	http://www.genome.jp/dbget-bin/www_bget?ath:AT3G14225
evm.TU.scaffold106.5	M2	hypothetical protein	http://www.genome.jp/dbget-bin/www_bget?ath:AT3G13950
evm.TU.scaffold106.81	M2	leucine-rich repeat transmembrane protein kinase	http://www.genome.jp/dbget-bin/www_bget?ath:AT3G14840
evm.TU.scaffold107.11	M2	putative pectinesterase/pectinesterase inhibitor 34	http://www.genome.jp/dbget-bin/www_bget?ath:AT3G49220
evm.TU.scaffold107.15	M2	pyruvate kinase-like protein; K00873 pyruvate kinase [EC:2.7.1.40]	http://www.genome.jp/dbget-bin/www_bget?ath:AT3G49160
evm.TU.scaffold107.19	M2	PRXCB; peroxidase 34; K00430 peroxidase [EC:1.11.1.7]	http://www.genome.jp/dbget-bin/www_bget?ath:AT3G49120
evm.TU.scaffold107.6	M2	putative cysteine proteinase; K01376 [EC:3.4.22.-]	http://www.genome.jp/dbget-bin/www_bget?ath:AT3G49340
evm.TU.scaffold1072.24	M2	RHD2; Respiratory burst oxidase homolog protein C; K13447 respiratory burst oxidase [EC:1.6.3.- 1.11.1.-]	http://www.genome.jp/dbget-bin/www_bget?ath:AT5G51060
evm.TU.scaffold1072.25	M2	--	--
evm.TU.scaffold1072.28	M2	GDH2; glutamate dehydrogenase 2; K00261 glutamate dehydrogenase (NAD(P)+) [EC:1.4.1.3]	http://www.genome.jp/dbget-bin/www_bget?ath:AT5G07440
evm.TU.scaffold1073.1	M2	hypothetical protein	http://www.genome.jp/dbget-bin/www_bget?ath:AT2G04039
evm.TU.scaffold1081.76	M2	hypothetical protein	http://www.genome.jp/dbget-bin/www_bget?ath:AT5G59080
evm.TU.scaffold1083.10	M2	--	--
evm.TU.scaffold109.18	M2	GSTU11; glutathione S-transferase TAU 11; K00799 glutathione S-transferase [EC:2.5.1.18]	http://www.genome.jp/dbget-bin/www_bget?ath:AT1G69930
evm.TU.scaffold109.55	M2	PIN3; auxin efflux carrier component 3; K13947 auxin efflux carrier family	http://www.genome.jp/dbget-bin/www_bget?ath:AT1G70940
evm.TU.scaffold1096.2	M2	Haloacid dehalogenase-like hydrolase (HAD) superfamily protein; K01091 phosphoglycolate phosphatase [EC:3.1.3.18]	http://www.genome.jp/dbget-bin/www_bget?ath:AT5G36790
evm.TU.scaffold11.10	M2	hypothetical protein	http://www.genome.jp/dbget-bin/www_bget?ath:AT5G48790
evm.TU.scaffold11.108	M2	L-type lectin-domain containing receptor kinase IX.1	http://www.genome.jp/dbget-bin/www_bget?ath:AT5G10530
evm.TU.scaffold11.119	M2	Leucine-rich repeat transmembrane protein kinase	http://www.genome.jp/dbget-bin/www_bget?ath:AT1G29720
evm.TU.scaffold11.120	M2	GDSL esterase/lipase	http://www.genome.jp/dbget-bin/www_bget?ath:AT1G29670
evm.TU.scaffold11.139	M2	hypothetical protein	http://www.genome.jp/dbget-bin/www_bget?ath:AT1G29290
evm.TU.scaffold11.188	M2	LTPG1; glycosylphosphatidylinositol-anchored lipid protein transfer 1	http://www.genome.jp/dbget-bin/www_bget?ath:AT1G27950
evm.TU.scaffold11.26	M2	LCR46; putative defensin-like protein	http://www.genome.jp/dbget-bin/www_bget?ath:AT5G48945
evm.TU.scaffold11.85	M2	WVD2; protein WAVE-DAMPENED 2	http://www.genome.jp/dbget-bin/www_bget?ath:AT5G28646
evm.TU.scaffold11.89	M2	hypothetical protein	http://www.genome.jp/dbget-bin/www_bget?ath:AT3G04550
evm.TU.scaffold1110.15	M2	1-aminocyclopropane-1-carboxylate oxidase-like 6	http://www.genome.jp/dbget-bin/www_bget?ath:AT1G04350
evm.TU.scaffold1116.12	M2	PIP1;4; plasma membrane intrinsic protein 1;4; K09872 aquaporin PIP	http://www.genome.jp/dbget-bin/www_bget?ath:AT4G00430
evm.TU.scaffold1145.2	M2	lipopolysaccharide-modifying domain-containing protein	http://www.genome.jp/dbget-bin/www_bget?ath:AT3G61290
evm.TU.scaffold115.34	M2	hypothetical protein	http://www.genome.jp/dbget-bin/www_bget?ath:AT5G12050
evm.TU.scaffold1153.3	M2	transcription factor bHLH64	http://www.genome.jp/dbget-bin/www_bget?ath:AT2G18300
evm.TU.scaffold1158.1	M2	MYB34; myb domain protein 34; K09422 myb proto-oncogene protein, plant	http://www.genome.jp/dbget-bin/www_bget?ath:AT5G60890
evm.TU.scaffold1158.12	M2	SCPL34; serine carboxypeptidase-like 34; K16297 serine carboxypeptidase-like clade II [EC:3.4.16.-]	http://www.genome.jp/dbget-bin/www_bget?ath:AT5G23210
evm.TU.scaffold1159.8	M2	RGXT1; rhamnogalacturonan xylosyltransferase 1; K11714 rhamnogalacturonan II specific xylosyltransferase [EC:2.4.2.-]	http://www.genome.jp/dbget-bin/www_bget?ath:AT4G01770
evm.TU.scaffold116.38	M2	plant invertase/pectin methylesterase inhibitor domain-containing protein	http://www.genome.jp/dbget-bin/www_bget?ath:AT4G25260
evm.TU.scaffold1160.1	M2	BRI1; protein brassinosteroid insensitive 1; K13415 protein brassinosteroid insensitive 1 [EC:2.7.10.1 2.7.11.1]	http://www.genome.jp/dbget-bin/www_bget?ath:AT4G39400
evm.TU.scaffold1173.2	M2	GSTF6; glutathione S-transferase F6; K00799 glutathione S-transferase [EC:2.5.1.18]	http://www.genome.jp/dbget-bin/www_bget?ath:AT1G02930
evm.TU.scaffold1175.10	M2	polynucleotidyl transferase, ribonuclease H-like superfamily protein	http://www.genome.jp/dbget-bin/www_bget?ath:AT5G61390
evm.TU.scaffold118.17	M2	C2H2-type zinc finger-containing protein	http://www.genome.jp/dbget-bin/www_bget?ath:AT3G49930
evm.TU.scaffold1188.18	M2	HOL1; thiocyanate methyltransferase 1	http://www.genome.jp/dbget-bin/www_bget?ath:AT2G43910
evm.TU.scaffold119.15	M2	EXL3; protein EXORDIUM like 3	http://www.genome.jp/dbget-bin/www_bget?ath:AT5G51550
evm.TU.scaffold1198.30	M2	WNK1; serine/threonine-protein kinase WNK1; K08867 WNK lysine deficient protein kinase [EC:2.7.11.1]	http://www.genome.jp/dbget-bin/www_bget?ath:AT3G04910
evm.TU.scaffold120.12	M2	haloacid dehalogenase-like hydrolase (HAD) superfamily protein	http://www.genome.jp/dbget-bin/www_bget?ath:AT5G59490
evm.TU.scaffold120.55	M2	transcription factor-related protein; K03122 transcription initiation factor TFIIA large subunit	http://www.genome.jp/dbget-bin/www_bget?ath:AT5G59230
evm.TU.scaffold120.56	M2	Major facilitator superfamily protein	http://www.genome.jp/dbget-bin/www_bget?ath:AT5G59250
evm.TU.scaffold1206.1	M2	late embryogenesis abundant 3-like protein	http://www.genome.jp/dbget-bin/www_bget?ath:AT1G02820
evm.TU.scaffold1224.13	M2	WRKY70; WRKY transcription factor 70	http://www.genome.jp/dbget-bin/www_bget?ath:AT3G56400
evm.TU.scaffold123.33	M2	non-specific lipid transfer protein GPI-anchored 2	http://www.genome.jp/dbget-bin/www_bget?ath:AT3G43720
evm.TU.scaffold124.6	M2	MYB116; putative transcription factor (MYB116); K09422 myb proto-oncogene protein, plant	http://www.genome.jp/dbget-bin/www_bget?ath:AT1G25340
evm.TU.scaffold1248.23	M2	--	--
evm.TU.scaffold1252.14	M2	hypothetical protein	http://www.genome.jp/dbget-bin/www_bget?ath:AT1G05870
evm.TU.scaffold1252.27	M2	ADS1; delta-9 acyl-lipid desaturase 1; K00507 stearoyl-CoA desaturase (delta-9 desaturase) [EC:1.14.19.1]	http://www.genome.jp/dbget-bin/www_bget?ath:AT1G06080
evm.TU.scaffold1254.21	M2	SMAD/FHA domain-containing protein	http://www.genome.jp/dbget-bin/www_bget?ath:AT2G21530
evm.TU.scaffold1255.16	M2	LHCB2.3; photosystem II light harvesting complex protein 2.3; K08913 light-harvesting complex II chlorophyll a/b binding protein 2	http://www.genome.jp/dbget-bin/www_bget?ath:AT3G27690
evm.TU.scaffold126.36	M2	pollen Ole e 1 allergen and extensin family protein	http://www.genome.jp/dbget-bin/www_bget?ath:AT1G78040
evm.TU.scaffold126.49	M2	DNA-directed RNA polymerase II protein	http://www.genome.jp/dbget-bin/www_bget?ath:AT1G77890
evm.TU.scaffold1266.1	M2	hypothetical protein	http://www.genome.jp/dbget-bin/www_bget?ath:AT3G22240
evm.TU.scaffold1267.12	M2	BG_PPAP; glucan endo-1,3-beta-glucosidase 10	http://www.genome.jp/dbget-bin/www_bget?ath:AT5G42100
evm.TU.scaffold127.22	M2	GUN4; protein GENOMES UNCOUPLED 4	http://www.genome.jp/dbget-bin/www_bget?ath:AT3G59400
evm.TU.scaffold128.68	M2	PIF3; transcription factor PIF3; K12126 phytochrome-interacting factor 3	http://www.genome.jp/dbget-bin/www_bget?ath:AT1G09530
evm.TU.scaffold1288.5	M2	hypothetical protein	http://www.genome.jp/dbget-bin/www_bget?ath:AT5G55710
evm.TU.scaffold1292.14	M2	KTI1; kunitz trypsin inhibitor 1	http://www.genome.jp/dbget-bin/www_bget?ath:AT1G73260
evm.TU.scaffold1292.27	M2	alpha/beta-Hydrolases superfamily protein	http://www.genome.jp/dbget-bin/www_bget?ath:AT1G73480
evm.TU.scaffold1297.18	M2	--	--
evm.TU.scaffold13.158	M2	FLA17; fasciclin-like arabinogalactan protein 17 precursor	http://www.genome.jp/dbget-bin/www_bget?ath:AT5G06390
evm.TU.scaffold13.92	M2	aspartyl protease family protein	http://www.genome.jp/dbget-bin/www_bget?ath:AT5G07030
evm.TU.scaffold1301.15	M2	ADS1; delta-9 acyl-lipid desaturase 1; K00507 stearoyl-CoA desaturase (delta-9 desaturase) [EC:1.14.19.1]	http://www.genome.jp/dbget-bin/www_bget?ath:AT1G06080
evm.TU.scaffold1301.8	M2	ORA59; ethylene-responsive transcription factor ERF094	http://www.genome.jp/dbget-bin/www_bget?ath:AT1G06160
evm.TU.scaffold1307.7	M2	ERD3; putative methyltransferase PMT21	http://www.genome.jp/dbget-bin/www_bget?ath:AT4G19120
evm.TU.scaffold1310.19	M2	hypothetical protein	http://www.genome.jp/dbget-bin/www_bget?ath:AT5G03550
evm.TU.scaffold1313.16	M2	alpha/beta hydrolase related protein	http://www.genome.jp/dbget-bin/www_bget?ath:AT2G40095
evm.TU.scaffold1316.12	M2	BZIP61; transcription factor BZIP61	http://www.genome.jp/dbget-bin/www_bget?ath:AT3G58120
evm.TU.scaffold132.5	M2	ATPC1; ATP synthase gamma chain 1; K02115 F-type H+-transporting ATPase subunit gamma	http://www.genome.jp/dbget-bin/www_bget?ath:AT4G04640
evm.TU.scaffold1321.1	M2	hypothetical protein	http://www.genome.jp/dbget-bin/www_bget?ath:AT1G26920
evm.TU.scaffold1321.5	M2	KDR; basic helix-loop-helix protein KIDARI	http://www.genome.jp/dbget-bin/www_bget?ath:AT1G26945
evm.TU.scaffold1328.9	M2	SCO1; elongation factor G; K02355 elongation factor G	http://www.genome.jp/dbget-bin/www_bget?ath:AT1G62750
evm.TU.scaffold1334.11	M2	WAT1; protein walls are thin 1	http://www.genome.jp/dbget-bin/www_bget?ath:AT1G75500
evm.TU.scaffold137.5	M2	sks4; protein SKU5 similar 4	http://www.genome.jp/dbget-bin/www_bget?ath:AT4G22010
evm.TU.scaffold137.70	M2	PGR5-LIKE_A; PGR5-like protein 1A	http://www.genome.jp/dbget-bin/www_bget?ath:AT4G22890
evm.TU.scaffold137.88	M2	--	--
evm.TU.scaffold1374.7	M2	CA2; carbonic anhydrase 2; K01673 carbonic anhydrase [EC:4.2.1.1]	http://www.genome.jp/dbget-bin/www_bget?ath:AT5G14740
evm.TU.scaffold1378.16	M2	FAR1; fatty acyl-CoA reductase 1; K13356 fatty acyl-CoA reductase [EC:1.2.1.-]	http://www.genome.jp/dbget-bin/www_bget?ath:AT5G22500
evm.TU.scaffold1387.2	M2	putative methyltransferase PMT18	http://www.genome.jp/dbget-bin/www_bget?ath:AT1G33170
evm.TU.scaffold139.10	M2	Bax inhibitor-1 family protein	http://www.genome.jp/dbget-bin/www_bget?ath:AT4G14730
evm.TU.scaffold139.104	M2	NSF; N-ethylmaleimide sensitive factor; K06027 vesicle-fusing ATPase [EC:3.6.4.6]	http://www.genome.jp/dbget-bin/www_bget?ath:AT4G04910
evm.TU.scaffold139.112	M2	putative beta-1,3-endoglucanase	http://www.genome.jp/dbget-bin/www_bget?ath:AT4G16260
[truncated: 2,806 more rows]

## Sheet: hubs
Hubs
M1	evm.TU.scaffold738.14,evm.TU.scaffold257.179,evm.TU.scaffold23.58,evm.TU.scaffold56.208
M2	evm.TU.scaffold1096.2,evm.TU.scaffold9.3,evm.TU.scaffold33.12,evm.TU.scaffold1049.16
M3	evm.TU.scaffold407.36,novel.295,evm.TU.scaffold2266.17,evm.TU.scaffold394.72
M4	evm.TU.scaffold1600.9,novel.1944,evm.TU.scaffold276.8,evm.TU.scaffold474.13
M5	novel.2038,novel.355,evm.TU.scaffold105.69,evm.TU.scaffold1706.5
M6	novel.300,evm.TU.scaffold34.18,novel.3726,evm.TU.scaffold142.2
M7	evm.TU.scaffold1646.7,evm.TU.scaffold947.16,evm.TU.scaffold947.7,evm.TU.scaffold947.17
M8	evm.TU.scaffold1772.2,novel.1051,evm.TU.scaffold337.8,evm.TU.scaffold1382.8
M9	evm.TU.scaffold66.58,evm.TU.scaffold98.36,evm.TU.scaffold5.88,evm.TU.scaffold49.20
M10	evm.TU.scaffold21.97,evm.TU.scaffold2025.18,evm.TU.scaffold2841.7,evm.TU.scaffold1437.5
M11	evm.TU.scaffold256.62,novel.3818,novel.895,evm.TU.scaffold128.63
M12	evm.TU.scaffold12.104,evm.TU.scaffold424.38,evm.TU.scaffold13.114,evm.TU.scaffold16.189
M13	evm.TU.scaffold1213.3,evm.TU.scaffold3318.3,evm.TU.scaffold1748.8,evm.TU.scaffold718.12
M14	evm.TU.scaffold78.40,evm.TU.scaffold2220.1,evm.TU.scaffold233.35,evm.TU.scaffold800.43
M15	evm.TU.scaffold1462.2,evm.TU.scaffold644.8,evm.TU.scaffold143.47,novel.938
M16	evm.TU.scaffold60.139,evm.TU.scaffold60.101,evm.TU.scaffold277.25,evm.TU.scaffold60.187
M17	evm.TU.scaffold422.40,evm.TU.scaffold4359.3,evm.TU.scaffold794.39,novel.570
M18	evm.TU.scaffold254.31,evm.TU.scaffold57.22,evm.TU.scaffold73.133,evm.TU.scaffold51.80
M19	evm.TU.scaffold258.137,novel.2430,evm.TU.scaffold400.11,novel.1119
M20	novel.1451,evm.TU.scaffold11.17,novel.2508,evm.TU.scaffold11.32
M21	evm.TU.scaffold119.51,evm.TU.scaffold288.2,evm.TU.scaffold332.14,novel.1056
M22	novel.2421,evm.TU.scaffold2183.8,novel.2556,evm.TU.scaffold160.68
M23	novel.2174,evm.TU.scaffold309.6,novel.3031,evm.TU.scaffold1321.7
M24	novel.1100,evm.TU.scaffold176.53,evm.TU.scaffold176.137,evm.TU.scaffold184.63
M25	evm.TU.scaffold1570.32,evm.TU.scaffold4191.4,evm.TU.scaffold1570.31,evm.TU.scaffold2074.10
M26	novel.778,evm.TU.scaffold93.35,evm.TU.scaffold1442.14,evm.TU.scaffold25.92
M27	evm.TU.scaffold444.61,evm.TU.scaffold444.20,evm.TU.scaffold444.32,novel.3526
M28	novel.2535,evm.TU.scaffold993.6,evm.TU.scaffold380.6,evm.TU.scaffold1623.5
NC	evm.TU.scaffold462.18,evm.TU.scaffold3155.2,evm.TU.scaffold699.35,evm.TU.scaffold2229.2
